# Supplementary material
Source: MDPI journal article supplement (https://www.mdpi.com/2073-4395/13/5/1383)
Supplement: s1 [file s1]

Archive with 6 entries (6 files):
- Supplementary Figures.pdf
- Supplementary Table S1. List of primers used for RT⌐/qPCR analysis, genotyping and CDS cloning.xlsx
- Supplementary Table S2. KEGG category of differential metabolites in gmfbac1gmfbac2 vs wild type.xlsx
- Supplementary Table S3. 552 DEGs in gmfbac1gmfbac2 vs wild type.xlsx
- Supplementary Table S4. KEGG category of downregulated DEGs in gmfbac1gmfbac2 vs wild type.xlsx
- Supplementary Table S5. KEGG category of upregulated DEGs in gmfbac1gmfbac2 vs wild type.xlsx
