# Supplementary material
Source: MDPI journal article supplement (https://www.mdpi.com/2073-4395/13/5/1383)
Supplement: s1 [file s1 › Supplementary Table S1. List of primers used for RT⌐/qPCR analysis, genotyping and CDS cloning.xlsx]

## Sheet: Sheet1
Supplementary Table S1. List of primers used for RT‐qPCR analysis, genotyping and CDS cloning
	gene ID	Forward	Reverse
Tefs-qPCR	Glyma.17G186600	TGCAAAGGAGGCTGCTAACT	CAGCATCACCGTTCTTCAAA
GmFBAc1-qPCR	Glyma.02G222400	AAACCTGTGCAACAGGGAAGGG	ACACAAAGCCTCATTCACAGCAC
GmFBAc2-qPCR	Glyma.14G189400	AGCACCCTTAAGGCATGGAGTG	AAGGGCTTCCTGAGCCTTCTTC
GmFBAc3-qPCR	Glyma.03G191500	TGCTGTTCCGGCCATTGTCTTC	ATGGCGTTGAGGTTGAGGGTTG
GmFBAc4-qPCR	Glyma.10G066700	AAGCCCAACATGGTGACTCCTG	TCACCGTATGCTCCGCTATGAC
GmFBAc5-qPCR	Glyma.13G151800	TGAGGTCATAGCGGAGCATACG	AGAAACACGATCGCCGGAACTG
GmFBAc6-qPCR	Glyma.02G303000	AGCACTGCAACAAAGCACACTC	ATGCCTCTTGAGCTTTGGCAAC
GmFBAc7-qPCR	Glyma.14G010900	TGGTGGGCAAAGTGAAGAAGAAGC	TCCATGGCTTCAACACCTCCAAC
GmFBAp1-qPCR	Glyma.10G268500	AGTCCCAACCCATGGCATGTTTC	GGGTGTCCTTGCCATGTCTTTAGC
GmFBAp2-qPCR	Glyma.12G153001	GCGATCAGAACATTGTGCCCGA	CAAGACTCATTGTTTGACCCTGGC
GmFBAp3-qPCR	Glyma.20G122500	CCTCTGCCAGGGTCAAACAATGAG	TCAGCAGACCTAGAAGCCAACC
GmFBAp4-qPCR	Glyma.04G008300	AAGGCTGCTCAAGATGCACTCC	TCACCCTCGGCAGTGTACTTTC
GmFBAp5-qPCR	Glyma.12G037400	TCGCTCAGCTGCATACTACGAG	TGCTCACAACAGTACGCCATTTG
GmFBAp6-qPCR	Glyma.11G111100	TACACCGGTGAGGGTGAATCTG	TCCTCCGTCAACACCTACTACAAC
GmFBAp7-qPCR	Glyma.11G111400	TGCTCTGGCAGTTAAGGAAGCTG	GGACCAATCCATTGTCCTGAGC
GmARF-qPCR	Glyma.13G140500	AGGGTGCTTTACTGCGATTCAG	ACTGAATGGCTCATCACCAATGTG
GmARF-qPCR	Glyma.13G140600	TCACGCTGCTACGCCAATGAAG	AGACGTTCTCACTGATGCTAGGC
GmARF-qPCR	Glyma.12G076200	GTTCTGGAGATGTGTTGTCTCACC	CCATAAGGCACTTCGCTTTGTCC
GmARF-qPCR	Glyma.12G174100	TCACCCGGAAAGTCATCTTCTACC	ACTGGTATCCGAACCAACTTGCC
GmJAZ-qPCR	Glyma.15G179600	AAACAACGTGGCACCAAAGAAC	AGGTCCATAGGAGGAAGCTTGTG
GmJAZ-qPCR	Glyma.17G047700	AAGGTGCCTTCGGAGACCTTAC	TGGGTTCCGTTGCTTGATGATGG
GmJAZ-qPCR	Glyma.01G204400	AGCTGACAAAGCCAAGGACATC	AAGTGTAAGCACAGTCGTTCTGG
GmJAZ-qPCR	Glyma.11G038600	TGACCAAGGATGCTAGAGGTTCAC	AAGACAAGAACTTGGCCACCATAG
GmFBAc1-target site	Glyma.02G222400	CTCATTCACAGCACGGTGGTGT	CCTCATGACATTCACAAGTGTGCC
GmFBAc2-target site	Glyma.14G189400	CGTTAACAGCAAGGTGGTGGTG	TTCACAAGTGTGCTGCCGTCACCG
GmFBAc1-CDS-BP	Glyma.02G222400	GGGGACAAGTTTGTACAAAAAGCAGGCTGCATGTCTCACTTCAAGGGCAAGTACC	GGGGACCACTTTGTACAAGAAAGCTGGGTGGTAGCTGTAGTTCGAAACATGGAGGC
GmFBAc1-CDS-BP	Glyma.14G189400	GGGGACAAGTTTGTACAAAAAGCAGGCTGCATGTCTCACTTCAAGGGCAAGTACC	GGGGACCACTTTGTACAAGAAAGCTGGGTGGTACTTGTAGTCCTCAACATGGAGGC
