# Supplementary material
Source: MDPI journal article supplement (https://www.mdpi.com/2073-4395/13/5/1383)
Supplement: s1 [file s1 › Supplementary Table S2. KEGG category of differential metabolites in gmfbac1gmfbac2 vs wild type.xlsx]

## Sheet: Sheet1
Supplementary Table S2. KEGG category of differential metabolites in gmfbac1gmfbac2 vs wild type
ID Annotation	ID Annotation (Arabidopsis)	Annotation	Category	Database	N	n	M	m	p-value	FDR correction	Submitted IDs	Matching IDs
map00970	ath00970	Aminoacyl-tRNA biosynthesis	Pathways	KEGG	12	8	3358	75	1.95471e-11	8.99169e-10	C00037|C00047|C00049|C00079|C00148|C00152|C00183|C00188	C00037|C00047|C00049|C00079|C00148|C00152|C00183|C00188
map01100	ath01100	Metabolic pathways	Pathways	KEGG	12	12	3358	1455	4.26758e-05	0.00074548	C00026|C00037|C00047|C00049|C00079|C00099|C00137|C00148|C00152|C00183|C00188|C00209	C00026|C00037|C00047|C00049|C00079|C00099|C00137|C00148|C00152|C00183|C00188|C00209
map01064	ath01064	Biosynthesis of alkaloids derived from ornithine, lysine and nicotinic acid	Pathways	KEGG	12	4	3358	67	6.35681e-05	0.00074548	C00026|C00047|C00049|C00079	C00026|C00047|C00049|C00079
map00910	ath00910	Nitrogen metabolism	Pathways	KEGG	12	3	3358	26	8.66071e-05	0.00074548	C00037|C00049|C00152	C00037|C00049|C00152
map00250	ath00250	Alanine, aspartate and glutamate metabolism	Pathways	KEGG	12	3	3358	24	6.7693e-05	0.00074548	C00026|C00049|C00152	C00026|C00049|C00152
map00770	ath00770	Pantothenate and CoA biosynthesis	Pathways	KEGG	12	3	3358	27	9.72365e-05	0.00074548	C00049|C00099|C00183	C00049|C00099|C00183
map00300	ath00300	Lysine biosynthesis	Pathways	KEGG	12	3	3358	32	0.00016323	0.00107265	C00026|C00047|C00049	C00026|C00047|C00049
map00460	ath00460	Cyanoamino acid metabolism	Pathways	KEGG	12	3	3358	41	0.000344491	0.00198082	C00037|C00049|C00152	C00037|C00049|C00152
map00260	ath00260	Glycine, serine and threonine metabolism	Pathways	KEGG	12	3	3358	49	0.000585838	0.00299428	C00037|C00049|C00188	C00037|C00049|C00188
map01070	ath01070	Biosynthesis of plant hormones	Pathways	KEGG	12	3	3358	68	0.00153341	0.0070537	C00026|C00049|C00079	C00026|C00049|C00079
map00290	ath00290	Valine, leucine and isoleucine biosynthesis	Pathways	KEGG	12	2	3358	28	0.00420328	0.0175774	C00183|C00188	C00183|C00188
map00410	ath00410	beta-Alanine metabolism	Pathways	KEGG	12	2	3358	31	0.00513997	0.0197032	C00049|C00099	C00049|C00099
map00640	ath00640	Propanoate metabolism	Pathways	KEGG	12	2	3358	36	0.006895	0.0243977	C00099|C00183	C00099|C00183
map00630	ath00630	Glyoxylate and dicarboxylate metabolism	Pathways	KEGG	12	2	3358	44	0.0101902	0.0295813	C00026|C00209	C00026|C00209
map00310	ath00310	Lysine degradation	Pathways	KEGG	12	2	3358	47	0.0115753	0.0295813	C00037|C00047	C00037|C00047
map00340	ath00340	Histidine metabolism	Pathways	KEGG	12	2	3358	44	0.0101902	0.0295813	C00026|C00049	C00026|C00049
map01063	ath01063	Biosynthesis of alkaloids derived from shikimate pathway	Pathways	KEGG	12	3	3358	138	0.0113722	0.0295813	C00026|C00079|C00183	C00026|C00079|C00183
map00053	ath00053	Ascorbate and aldarate metabolism	Pathways	KEGG	12	2	3358	47	0.0115753	0.0295813	C00026|C00137	C00026|C00137
map00960	ath00960	Tropane, piperidine and pyridine alkaloid biosynthesis	Pathways	KEGG	12	2	3358	68	0.0233968	0.056645	C00047|C00079	C00047|C00079
map00966	ath00966	Glucosinolate biosynthesis	Pathways	KEGG	12	2	3358	74	0.0274131	0.0630502	C00079|C00183	C00079|C00183
map00330	ath00330	Arginine and proline metabolism	Pathways	KEGG	12	2	3358	82	0.0331751	0.0726694	C00049|C00148	C00049|C00148
map00780	ath00780	Biotin metabolism	Pathways	KEGG	12	1	3358	11	0.0386708	0.0808572	C00047	C00047
map01061	ath01061	Biosynthesis of phenylpropanoids	Pathways	KEGG	12	2	3358	97	0.0451487	0.0902973	C00026|C00079	C00026|C00079
map00020	ath00020	Citrate cycle (TCA cycle)	Pathways	KEGG	12	1	3358	20	0.0692856	0.132668	C00026	C00026
map00860	ath00860	Porphyrin and chlorophyll metabolism	Pathways	KEGG	12	2	3358	126	0.0721022	0.132668	C00037|C00188	C00037|C00188
map00710	ath00710	Carbon fixation in photosynthetic organisms	Pathways	KEGG	12	1	3358	23	0.0792902	0.140283	C00049	C00049
map04070	ath04070	Phosphatidylinositol signaling system	Pathways	KEGG	12	1	3358	27	0.0924764	0.146687	C00137	C00137
map00730	ath00730	Thiamine metabolism	Pathways	KEGG	12	1	3358	26	0.0891962	0.146687	C00037	C00037
map00400	ath00400	Phenylalanine, tyrosine and tryptophan biosynthesis	Pathways	KEGG	12	1	3358	27	0.0924764	0.146687	C00079	C00079
map00750	ath00750	Vitamin B6 metabolism	Pathways	KEGG	12	1	3358	32	0.108716	0.16132	C00026	C00026
map00660	ath00660	C5-Branched dibasic acid metabolism	Pathways	KEGG	12	1	3358	32	0.108716	0.16132	C00026	C00026
map00680	ath00680	Methane metabolism	Pathways	KEGG	12	1	3358	34	0.115136	0.164946	C00037	C00037
map01065	ath01065	Biosynthesis of alkaloids derived from histidine and purine	Pathways	KEGG	12	1	3358	35	0.118331	0.164946	C00026	C00026
map00052	ath00052	Galactose metabolism	Pathways	KEGG	12	1	3358	41	0.137277	0.166177	C00137	C00137
map00280	ath00280	Valine, leucine and isoleucine degradation	Pathways	KEGG	12	1	3358	41	0.137277	0.166177	C00183	C00183
map00480	ath00480	Glutathione metabolism	Pathways	KEGG	12	1	3358	38	0.127851	0.166177	C00037	C00037
map00562	ath00562	Inositol phosphate metabolism	Pathways	KEGG	12	1	3358	39	0.131003	0.166177	C00137	C00137
map00650	ath00650	Butanoate metabolism	Pathways	KEGG	12	1	3358	40	0.134145	0.166177	C00026	C00026
map00760	ath00760	Nicotinate and nicotinamide metabolism	Pathways	KEGG	12	1	3358	44	0.146609	0.172923	C00049	C00049
map00360	ath00360	Phenylalanine metabolism	Pathways	KEGG	12	1	3358	46	0.152779	0.175696	C00079	C00079
map01066	ath01066	Biosynthesis of alkaloids derived from terpenoid and polyketide	Pathways	KEGG	12	1	3358	48	0.158908	0.178287	C00026	C00026
map00270	ath00270	Cysteine and methionine metabolism	Pathways	KEGG	12	1	3358	56	0.18302	0.195789	C00049	C00049
map00940	ath00940	Phenylpropanoid biosynthesis	Pathways	KEGG	12	1	3358	55	0.180041	0.195789	C00079	C00079
map00240	ath00240	Pyrimidine metabolism	Pathways	KEGG	12	1	3358	59	0.191897	0.20062	C00099	C00099
map00230	ath00230	Purine metabolism	Pathways	KEGG	12	1	3358	92	0.283882	0.29019	C00037	C00037
map01062	ath01062	Biosynthesis of terpenoids and steroids	Pathways	KEGG	12	1	3358	98	0.299536	0.299536	C00026	C00026
