# Supplementary material
Source: MDPI journal article supplement (https://www.mdpi.com/2073-4395/13/5/1383)
Supplement: s1 [file s1 › Supplementary Table S3. 552 DEGs in gmfbac1gmfbac2 vs wild type.xlsx]

## Sheet: overlaped DEGs
	name	annotation		log2FC-1	log2FC-2	HC6-1	HC6-2	HC6-3	fba1-1	fba1-2	fba1-3	fba2-1	fba2-2	fba2-3	FDR1	FDR2	HC6-1	HC6-2	HC6-3	fba1-1	fba1-2	fba1-3	fba2-1	fba2-2	fba2-3		w	1	2
Glyma.16G170900		disease resistance family protein / LRR family protein		-11.2247	-11.2499	1.16249	1.16689	1.35965	0	0	0	0	0	0	1.38182e-18	1.09724e-18	1.16249	1.16689	1.35965	0	0	0	0	0	0		1.22968	0	0
Glyma.03G073744		Disease resistance protein (TIR-NBS-LRR class) family		-8.85982	-8.88504	0.266174	0.185169	0.212903	0	0	0	0	0	0	4.01773e-10	3.78218e-10	0.266174	0.185169	0.212903	0	0	0	0	0	0		0.221415	0	0
Glyma.16G202000		Embryo-specific protein 3, (ATS3)		-7.57316	-4.73484	0.649478	0.361786	0.445899	0	0	0	0.053044	0	0	4.64424e-06	0.000549314	0.649478	0.361786	0.445899	0	0	0	0.053044	0	0		0.485721	0	0.0176813
Glyma.13G152134		0		-7.41207	-7.43729	0.274707	0.84368	0.433395	0	0	0	0	0	0	1.93371e-05	1.92463e-05	0.274707	0.84368	0.433395	0	0	0	0	0	0		0.517261	0	0
Glyma.16G214641		0		-6.94219	-6.9674	0.210716	0.32078	0.161053	0	0	0	0	0	0	0.000203905	0.000209602	0.210716	0.32078	0.161053	0	0	0	0	0	0		0.23085	0	0
Glyma.06G191500		Galactose mutarotase-like superfamily protein		-6.80524	-6.83047	0.094652	0.197466	0.168259	0	0	0	0	0	0	0.000423031	0.000434172	0.094652	0.197466	0.168259	0	0	0	0	0	0		0.153459	0	0
Glyma.03G052200		PEBP (phosphatidylethanolamine-binding protein) family protein		-6.67805	-6.70331	0.158916	0.230633	0.397217	0	0	0	0	0	0	0.000837224	0.000857381	0.158916	0.230633	0.397217	0	0	0	0	0	0		0.262255	0	0
Glyma.20G055867		SIGNAL PEPTIDE PEPTIDASE-LIKE 2		-6.47327	-4.63529	0.223988	0.3916	0.447134	0	0	0	0.043586	0	0	0.00197713	0.0269602	0.223988	0.3916	0.447134	0	0	0	0.043586	0	0		0.354241	0	0.0145287
Glyma.14G068400		Calcium-dependent lipid-binding (CaLB domain) family protein		-6.30791	-6.33311	0.190662	0.229108	0.081218	0	0	0	0	0	0	0.00433936	0.00444202	0.190662	0.229108	0.081218	0	0	0	0	0	0		0.166996	0	0
Glyma.13G034100		K-box region and MADS-box transcription factor family protein		-6.20908	-6.23428	0.08069	0.244671	0.077501	0	0	0	0	0	0	0.00689554	0.00697367	0.08069	0.244671	0.077501	0	0	0	0	0	0		0.134287	0	0
Glyma.19G078300	GAPDH	glyceraldehyde-3-phosphate dehydrogenase C2		-6.20096	-6.22631	0.030077	0.030485	0.252675	0	0	0	0	0	0	0.0125581	0.0119993	0.030077	0.030485	0.252675	0	0	0	0	0	0		0.104412	0	0
Glyma.16G195100		ATP binding;nucleic acid binding;helicases		-6.1894	-6.21465	0.025046	0.028711	0.045978	0	0	0	0	0	0	0.0063998	0.00659394	0.025046	0.028711	0.045978	0	0	0	0	0	0		0.033245	0	0
Glyma.04G245500		K-box region and MADS-box transcription factor family protein		-6.14673	-6.17185	0.177151	0.114833	0	0	0	0	0	0	0	0.0287886	0.0262049	0.177151	0.114833	0	0	0	0	0	0	0		0.097328	0	0
Glyma.13G065700		exocyst subunit exo70 family protein A2		-6.14107	-9.36606	0.826323	0.876512	0.164626	0.021762	0	0	0	0	0	0.00216709	9.19511e-11	0.826323	0.876512	0.164626	0.021762	0	0	0	0	0		0.622487	0.007254	0
Glyma.06G020300		Pyridoxal-dependent decarboxylase family protein		-6.09937	-6.12474	0	0.036882	0.139919	0	0	0	0	0	0	0.0353493	0.0321817	0	0.036882	0.139919	0	0	0	0	0	0		0.0589337	0	0
Glyma.18G087000		NB-ARC domain-containing disease resistance protein		-5.98689	-6.01208	0.045969	0.039331	0.011038	0	0	0	0	0	0	0.0151398	0.0153589	0.045969	0.039331	0.011038	0	0	0	0	0	0		0.0321127	0	0
Glyma.13G145500		Protein of unknown function (DUF1624)		-5.98073	-6.00595	0.055617	0.091023	0.051984	0	0	0	0	0	0	0.0134408	0.0138175	0.055617	0.091023	0.051984	0	0	0	0	0	0		0.066208	0	0
Glyma.08G268400		Bifunctional inhibitor/lipid-transfer protein/seed storage 2S albumin superfamily protein		-5.97839	-6.00361	0.089179	0.214359	0.152011	0	0	0	0	0	0	0.0142806	0.0146102	0.089179	0.214359	0.152011	0	0	0	0	0	0		0.15185	0	0
Glyma.05G246800		0		-5.95912	-5.98438	0.143241	0.048938	0.230483	0	0	0	0	0	0	0.0177168	0.0178178	0.143241	0.048938	0.230483	0	0	0	0	0	0		0.140887	0	0
Glyma.10G240900		K-box region and MADS-box transcription factor family protein		-5.90843	-5.93361	0.094715	0.144803	0.030391	0	0	0	0	0	0	0.0207193	0.0207899	0.094715	0.144803	0.030391	0	0	0	0	0	0		0.0899697	0	0
Glyma.06G242550		STRUBBELIG-receptor family 3		-5.84993	-5.87517	0.034473	0.149446	0.18532	0	0	0	0	0	0	0.0240751	0.0239898	0.034473	0.149446	0.18532	0	0	0	0	0	0		0.12308	0	0
Glyma.07G260500	SS	starch synthase 3		-5.841	-5.86626	0.008363	0.030988	0.039637	0	0	0	0	0	0	0.0247148	0.0246264	0.008363	0.030988	0.039637	0	0	0	0	0	0		0.0263293	0	0
Glyma.13G101232		alpha-mannosidase 2		-5.81741	-5.84259	0.175674	0.137256	0.043501	0	0	0	0	0	0	0.0264904	0.0264718	0.175674	0.137256	0.043501	0	0	0	0	0	0		0.11881	0	0
Glyma.08G059100		FAD-binding Berberine family protein		-5.80828	-5.83348	0.099267	0.050432	0.047392	0	0	0	0	0	0	0.0244534	0.0246497	0.099267	0.050432	0.047392	0	0	0	0	0	0		0.065697	0	0
Glyma.08G359167		laccase 17		-5.76704	-5.79221	0.264159	0.056924	0.039744	0	0	0	0	0	0	0.0352635	0.0345718	0.264159	0.056924	0.039744	0	0	0	0	0	0		0.120276	0	0
Glyma.12G067100		cytochrome P450, family 93, subfamily D, polypeptide 1		-5.71561	-5.74083	0.046611	0.070864	0.044769	0	0	0	0	0	0	0.0304816	0.0309607	0.046611	0.070864	0.044769	0	0	0	0	0	0		0.0540813	0	0
Glyma.12G123366		disease resistance family protein / LRR family protein		-5.7125	-5.73772	0.031219	0.031291	0.029702	0	0	0	0	0	0	0.0303756	0.0308926	0.031219	0.031291	0.029702	0	0	0	0	0	0		0.0307373	0	0
Glyma.05G015500		EF hand calcium-binding protein family		-5.66543	-5.69064	0.110362	0.069601	0.070195	0	0	0	0	0	0	0.0357618	0.0361557	0.110362	0.069601	0.070195	0	0	0	0	0	0		0.083386	0	0
Glyma.19G231800		alpha/beta-Hydrolases superfamily protein		-4.40144	-3.58777	0.389718	0.104087	0.228305	0	0.027874	0	0	0	0.054751	0.00183533	0.0148348	0.389718	0.104087	0.228305	0	0.027874	0	0	0	0.054751		0.240703	0.00929133	0.0182503
Glyma.02G211100		0		-4.34674	-5.02113	2.46961	0.105955	3.91373	0.089029	0.071045	0.128462	0.054513	0.046315	0.058566	7.67078e-05	1.05409e-05	2.46961	0.105955	3.91373	0.089029	0.071045	0.128462	0.054513	0.046315	0.058566		2.1631	0.0961787	0.0531313
Glyma.20G034600		Peptidase C13 family		-4.31391	-3.74422	0.112389	0.205643	0.079342	0	0	0.032376	0	0	0.030551	0.00663353	0.0202501	0.112389	0.205643	0.079342	0	0	0.032376	0	0	0.030551		0.132458	0.010792	0.0101837
Glyma.04G022620		SIGNAL PEPTIDE PEPTIDASE-LIKE 2		-4.28117	-3.5652	1.40213	1.1299	0.940041	0	0.10924	0.066677	0.050596	0.145335	0.084522	3.50323e-11	1.20798e-11	1.40213	1.1299	0.940041	0	0.10924	0.066677	0.050596	0.145335	0.084522		1.15735	0.058639	0.0934843
Glyma.07G027500		Plant protein of unknown function (DUF247)		-4.19827	-3.24164	0.137196	0.114611	0.137133	0.022001	0	0	0	0.020696	0.020959	0.00829951	0.0219183	0.137196	0.114611	0.137133	0.022001	0	0	0	0.020696	0.020959		0.129647	0.00733367	0.013885
Glyma.16G185100		disease resistance family protein / LRR family protein		-4.19324	-4.4369	0.073572	0.084171	0.052096	0.003418	0	0.006314	0.00323	0	0.00424	9.94527e-05	6.12121e-05	0.073572	0.084171	0.052096	0.003418	0	0.006314	0.00323	0	0.00424		0.0699463	0.003244	0.00249
Glyma.08G223500		0		-4.16749	-7.35479	0.14283	0.131449	0.348629	0	0	0.027421	0	0	0	0.00598633	3.06652e-05	0.14283	0.131449	0.348629	0	0	0.027421	0	0	0		0.207636	0.00914033	0
Glyma.16G154600		fucosyltransferase 13		-4.07746	-3.79757	0.09222	0.124234	0.158622	0.02303	0	0	0	0.021809	0	0.0150642	0.0246264	0.09222	0.124234	0.158622	0.02303	0	0	0	0.021809	0		0.125025	0.00767667	0.00726967
Glyma.09G195600	PILS	Auxin efflux carrier family protein		-4.00711	-6.87302	0.128028	0.122525	0.134723	0	0	0.02422	0	0	0	0.0198839	0.000302707	0.128028	0.122525	0.134723	0	0	0.02422	0	0	0		0.128425	0.00807333	0
Glyma.04G252050		camphor resistance CrcB family protein		-3.97208	-6.87072	0.065336	0.229899	0.232709	0.032832	0	0	0	0	0	0.0295208	0.000476866	0.065336	0.229899	0.232709	0.032832	0	0	0	0	0		0.175981	0.010944	0
Glyma.11G050700		Subtilase family protein		-3.91623	-6.77988	0.037506	0.162308	0.028809	0	0	0.015019	0	0	0	0.047536	0.00106062	0.037506	0.162308	0.028809	0	0	0.015019	0	0	0		0.0762077	0.00500633	0
Glyma.20G076400		0		-3.73928	-3.65701	3.15245	1.94407	2.47313	0.211967	0.114779	0.081164	0.181256	0.176176	0.025402	7.45826e-14	8.42266e-14	3.15245	1.94407	2.47313	0.211967	0.114779	0.081164	0.181256	0.176176	0.025402		2.52322	0.13597	0.127611
Glyma.02G256100		Leucine-rich repeat protein kinase family protein		-3.6422	-7.50352	0.562194	0.20724	0.273536	0	0	0.074426	0	0	0	0.0145113	1.17497e-05	0.562194	0.20724	0.273536	0	0	0.074426	0	0	0		0.347657	0.0248087	0
Glyma.10G278000	FAD	fatty acid desaturase 2		-3.60114	-2.68725	1.03849	1.27727	1.3168	0.130197	0.091871	0.066508	0.223655	0.177972	0.135194	2.09324e-18	2.08093e-12	1.03849	1.27727	1.3168	0.130197	0.091871	0.066508	0.223655	0.177972	0.135194		1.21085	0.096192	0.17894
Glyma.16G172100		disease resistance family protein / LRR family protein		-3.58418	-4.77048	0.081597	0.099038	0.120242	0.010543	0	0.010887	0.01088	0	0	0.00178121	0.00039219	0.081597	0.099038	0.120242	0.010543	0	0.010887	0.01088	0	0		0.100292	0.00714333	0.00362667
Glyma.20G041100		zinc ion binding		-3.45485	-3.42531	1.23993	1.51789	1.06757	0.087749	0.124083	0.130918	0.101766	0.156397	0.09237	1.31079e-24	5.39331e-23	1.23993	1.51789	1.06757	0.087749	0.124083	0.130918	0.101766	0.156397	0.09237		1.27513	0.11425	0.116844
Glyma.08G308500		0		-3.43722	-8.40938	0.497104	0.26843	1.36775	0.048316	0.089523	0.044933	0	0	0	0.000170551	7.37901e-08	0.497104	0.26843	1.36775	0.048316	0.089523	0.044933	0	0	0		0.711096	0.060924	0
Glyma.19G231100		0		-3.31264	-3.58187	67.6476	64.9086	111.738	7.4282	9.15878	8.01179	6.56419	6.73299	6.93343	9.76138e-51	1.0659e-60	67.6476	64.9086	111.738	7.4282	9.15878	8.01179	6.56419	6.73299	6.93343		81.4315	8.19959	6.74354
Glyma.13G095200	XET	xyloglucan endotransglycosylase 6		-3.29414	-2.86043	3.86922	4.48909	3.80471	0.260637	0.2877	0.682525	0.475387	0.556391	0.630467	1.9217e-22	2.08704e-30	3.86922	4.48909	3.80471	0.260637	0.2877	0.682525	0.475387	0.556391	0.630467		4.05434	0.410287	0.554082
Glyma.09G009700		Protein of unknown function (DUF506)		-3.22687	-3.38388	3.1389	2.79875	3.03457	0.320583	0.36418	0.270218	0.231431	0.387526	0.232483	3.48917e-41	4.99904e-37	3.1389	2.79875	3.03457	0.320583	0.36418	0.270218	0.231431	0.387526	0.232483		2.99074	0.318327	0.283813
Glyma.04G159300		AGAMOUS-like 8		-3.21756	-5.1295	0.479387	0.757225	0.555332	0.058861	0.075153	0.055046	0.050747	0	0	1.16003e-10	0.0321852	0.479387	0.757225	0.555332	0.058861	0.075153	0.055046	0.050747	0	0		0.597315	0.06302	0.0169157
Glyma.10G236000		CAP160 protein		-3.19567	-2.68426	1.57787	1.26656	1.67096	0.100164	0.145166	0.23916	0.221964	0.238941	0.230257	1.44423e-16	5.72384e-16	1.57787	1.26656	1.67096	0.100164	0.145166	0.23916	0.221964	0.238941	0.230257		1.50513	0.161497	0.230387
Glyma.01G204800		expansin-like B1		-3.08731	-3.15598	1.13157	0.834757	1.32143	0.244549	0.058039	0.07482	0.167204	0.075048	0.114003	4.947e-07	7.85674e-09	1.13157	0.834757	1.32143	0.244549	0.058039	0.07482	0.167204	0.075048	0.114003		1.09592	0.125803	0.118752
Glyma.18G273800		Malectin/receptor-like protein kinase family protein		-2.9759	-2.60109	0.141081	0.062775	0.236801	0	0.028406	0.027602	0.013932	0.02764	0.028085	0.0130078	0.0112079	0.141081	0.062775	0.236801	0	0.028406	0.027602	0.013932	0.02764	0.028085		0.146886	0.0186693	0.023219
Glyma.16G091300		K-box region and MADS-box transcription factor family protein		-2.9347	-2.84584	0.127553	0.308287	0.353342	0.026843	0.072135	0	0.070525	0.033872	0	0.0342278	0.0381651	0.127553	0.308287	0.353342	0.026843	0.072135	0	0.070525	0.033872	0		0.263061	0.0329927	0.034799
Glyma.01G055700		HCO3- transporter family		-2.89861	-3.00955	7.14251	4.11144	11.0422	1.99372	0.939589	0.095407	0.971545	0.979395	0.57461	2.07689e-05	1.39648e-09	7.14251	4.11144	11.0422	1.99372	0.939589	0.095407	0.971545	0.979395	0.57461		7.43204	1.00957	0.84185
Glyma.06G111600		nodulin MtN21 /EamA-like transporter family protein		-2.86797	-2.55071	0.534234	0.518928	0.550811	0.027097	0.106582	0.076022	0.102271	0.067744	0.102822	7.88005e-06	1.65643e-05	0.534234	0.518928	0.550811	0.027097	0.106582	0.076022	0.102271	0.067744	0.102822		0.534658	0.0699003	0.0909457
Glyma.03G233900		phloem protein 2-B2		-2.85726	-2.92316	2.91343	1.95591	4.46105	0.46933	0.270596	0.582041	0.389134	0.578688	0.261739	2.45988e-11	4.66935e-12	2.91343	1.95591	4.46105	0.46933	0.270596	0.582041	0.389134	0.578688	0.261739		3.11013	0.440656	0.409854
Glyma.09G128600		cation/H+ exchanger 4		-2.80441	-2.8345	0.097769	0.12198	0.289322	0.051116	0	0.0355	0	0.023961	0.054303	0.0265985	0.0301292	0.097769	0.12198	0.289322	0.051116	0	0.0355	0	0.023961	0.054303		0.16969	0.028872	0.026088
Glyma.06G234500		RING/U-box superfamily protein		-2.80088	-2.49595	1.44731	1.51502	2.44957	0.174867	0.424111	0.175673	0.45772	0.246579	0.239648	6.82553e-12	1.23912e-11	1.44731	1.51502	2.44957	0.174867	0.424111	0.175673	0.45772	0.246579	0.239648		1.80397	0.258217	0.314649
Glyma.01G011500		Mono-/di-acylglycerol lipase, N-terminal;Lipase, class 3		-2.76155	-2.86452	2.79579	3.5531	3.79928	0.45391	0.499319	0.545825	0.266582	0.53291	0.581668	1.01007e-36	5.42733e-27	2.79579	3.5531	3.79928	0.45391	0.499319	0.545825	0.266582	0.53291	0.581668		3.38272	0.499685	0.460387
Glyma.02G114100		0		-2.75306	-2.6215	15.792	15.2633	22.6873	3.34618	2.55136	2.15422	3.46094	2.77893	2.44132	5.55643e-45	7.59724e-45	15.792	15.2633	22.6873	3.34618	2.55136	2.15422	3.46094	2.77893	2.44132		17.9142	2.68392	2.89373
Glyma.12G063900	WOX	WUSCHEL related homeobox 2		-2.69635	-2.33335	1.43567	1.86499	1.60042	0.202765	0.245124	0.307738	0.27484	0.333447	0.361033	1.42767e-16	8.26665e-14	1.43567	1.86499	1.60042	0.202765	0.245124	0.307738	0.27484	0.333447	0.361033		1.6337	0.251876	0.323107
Glyma.13G095000	XET	Xyloglucan endotransglucosylase/hydrolase family protein		-2.65277	-2.62164	21.3261	21.1952	19.1638	3.12792	3.94907	2.77341	2.15052	3.31465	4.55301	3.78068e-83	6.11903e-46	21.3261	21.1952	19.1638	3.12792	3.94907	2.77341	2.15052	3.31465	4.55301		20.5617	3.28347	3.33939
Glyma.19G147200		Late Embryogenesis Abundant 4-5		-2.63699	-2.98854	1.33232	2.01794	2.01046	0.384128	0.247453	0.239009	0.145191	0.288041	0.243192	7.43708e-09	4.2395e-10	1.33232	2.01794	2.01046	0.384128	0.247453	0.239009	0.145191	0.288041	0.243192		1.78691	0.290197	0.225475
Glyma.08G181500		Peroxidase superfamily protein		-2.6229	-4.34421	0.292538	0.403949	0.234572	0.048736	0.03506	0.068443	0.021876	0	0.023213	0.000926078	9.10509e-06	0.292538	0.403949	0.234572	0.048736	0.03506	0.068443	0.021876	0	0.023213		0.310353	0.0507463	0.0150297
Glyma.06G021200		DC1 domain-containing protein		-2.6092	-2.64632	26.4411	25.5927	27.5366	4.04734	3.99618	4.51195	4.30401	3.88817	4.33978	1.77445e-176	1.93846e-186	26.4411	25.5927	27.5366	4.04734	3.99618	4.51195	4.30401	3.88817	4.33978		26.5235	4.18516	4.17732
Glyma.02G121600		K-box region and MADS-box transcription factor family protein		-2.59429	-4.61349	0.3526	0.271506	0.155302	0	0.066767	0.060566	0	0	0.032678	0.0496737	0.00134044	0.3526	0.271506	0.155302	0	0.066767	0.060566	0	0	0.032678		0.259803	0.0424443	0.0108927
Glyma.08G281600		arabinogalactan protein 3		-2.51776	-2.45566	46.8473	45.2198	47.7967	6.87514	8.44077	9.17383	8.69458	7.30529	9.46353	6.21545e-108	1.41148e-123	46.8473	45.2198	47.7967	6.87514	8.44077	9.17383	8.69458	7.30529	9.46353		46.6213	8.16325	8.4878
Glyma.09G185500		0		-2.50852	-2.28373	10.7866	11.2941	10.6732	1.8275	2.36363	1.59183	1.5352	2.25996	2.92299	5.69773e-51	3.16896e-32	10.7866	11.2941	10.6732	1.8275	2.36363	1.59183	1.5352	2.25996	2.92299		10.918	1.92765	2.23938
Glyma.02G177800		myb-like HTH transcriptional regulator family protein		-2.49975	-1.92506	1.92541	2.59524	3.04348	0.462505	0.565277	0.140238	0.706614	0.709359	0.336093	1.22102e-08	7.66786e-08	1.92541	2.59524	3.04348	0.462505	0.565277	0.140238	0.706614	0.709359	0.336093		2.52137	0.38934	0.584022
Glyma.02G142100		alpha/beta-Hydrolases superfamily protein		-2.49753	-2.25186	6.55498	6.64228	5.5539	1.1257	1.24058	0.966234	1.49182	1.14235	1.28713	6.28777e-50	1.50763e-40	6.55498	6.64228	5.5539	1.1257	1.24058	0.966234	1.49182	1.14235	1.28713		6.25038	1.11084	1.3071
Glyma.13G152746		homogentisate phytyltransferase 1		-2.48482	-1.51663	0.65748	0.397707	0.502099	0.176048	0	0.105568	0.094944	0.234895	0.211635	0.00893909	0.0217894	0.65748	0.397707	0.502099	0.176048	0	0.105568	0.094944	0.234895	0.211635		0.519095	0.093872	0.180491
Glyma.16G176900		disease resistance family protein / LRR family protein		-2.46911	-2.14571	0.473581	0.426064	0.528341	0.117458	0.06849	0.071129	0.072332	0.109971	0.138192	2.09256e-09	2.30815e-07	0.473581	0.426064	0.528341	0.117458	0.06849	0.071129	0.072332	0.109971	0.138192		0.475995	0.0856923	0.106832
Glyma.13G304200		0		-2.45204	-2.38915	0.802666	0.710113	0.759792	0.075059	0.213575	0.119295	0.115388	0.177452	0.14167	3.53639e-06	8.4382e-07	0.802666	0.710113	0.759792	0.075059	0.213575	0.119295	0.115388	0.177452	0.14167		0.757524	0.135976	0.144837
Glyma.04G037300		phospholipase A 2A		-2.43488	-1.96005	0.356646	0.519477	0.508622	0.116544	0.046732	0.088352	0.205105	0.059016	0.083812	0.000767572	0.0158384	0.356646	0.519477	0.508622	0.116544	0.046732	0.088352	0.205105	0.059016	0.083812		0.461582	0.083876	0.115978
Glyma.10G015000		0		-2.37678	-2.15449	2.30575	3.87241	4.096	0.46296	0.82241	0.689305	0.681743	1.07615	0.524386	2.08282e-11	4.85929e-09	2.30575	3.87241	4.096	0.46296	0.82241	0.689305	0.681743	1.07615	0.524386		3.42472	0.658225	0.760761
Glyma.04G238100		Nodulin MtN3 family protein		-2.33001	-2.12601	0.941105	0.87183	0.756353	0	0.255041	0.253729	0.124258	0.304016	0.150039	0.0154715	0.000938338	0.941105	0.87183	0.756353	0	0.255041	0.253729	0.124258	0.304016	0.150039		0.856429	0.16959	0.192771
Glyma.08G346100		Protein of unknown function (DUF506)		-2.31547	-2.1187	1.30478	1.40663	1.09491	0.440976	0.150524	0.172015	0.518784	0.234802	0.118644	1.88886e-06	7.12692e-05	1.30478	1.40663	1.09491	0.440976	0.150524	0.172015	0.518784	0.234802	0.118644		1.26877	0.254505	0.290743
Glyma.09G101100		nodulin MtN21 /EamA-like transporter family protein		-2.30787	-4.44964	0.502379	0.389288	0.584904	0.112467	0.066862	0.115011	0.050317	0.013599	0	1.90695e-05	5.36928e-09	0.502379	0.389288	0.584904	0.112467	0.066862	0.115011	0.050317	0.013599	0		0.49219	0.0981133	0.0213053
Glyma.15G262800		zinc transporter 1 precursor		-2.30567	-1.95472	3.78391	3.53645	4.159	0.80436	0.680213	0.836722	0.894954	1.2988	0.752989	2.97794e-25	1.24595e-14	3.78391	3.53645	4.159	0.80436	0.680213	0.836722	0.894954	1.2988	0.752989		3.82645	0.773765	0.982249
Glyma.16G094000		0		-2.25965	-4.17599	0.263646	0.551151	0.355422	0.118064	0.114325	0	0	0.027695	0.030847	0.049907	2.17574e-05	0.263646	0.551151	0.355422	0.118064	0.114325	0	0	0.027695	0.030847		0.390073	0.077463	0.019514
Glyma.20G063100		zinc transporter 1 precursor		-2.2256	-2.0543	6.52788	7.52348	8.87019	1.76108	1.90864	1.25147	2.21589	1.6975	1.58245	7.27436e-31	1.83542e-28	6.52788	7.52348	8.87019	1.76108	1.90864	1.25147	2.21589	1.6975	1.58245		7.64052	1.6404	1.83195
Glyma.17G065400	XET	xyloglucan endotransglycosylase 6		-2.22334	-2.24777	3.69706	4.09625	3.86752	0.874128	0.747602	0.879968	0.825884	0.87145	0.745765	1.98788e-20	3.7133e-20	3.69706	4.09625	3.86752	0.874128	0.747602	0.879968	0.825884	0.87145	0.745765		3.88695	0.833899	0.814366
Glyma.20G158500		CAP160 protein		-2.21623	-2.3875	2.30647	2.21882	2.75734	0.610352	0.569333	0.383952	0.564552	0.536421	0.269833	9.6796e-18	9.70322e-16	2.30647	2.21882	2.75734	0.610352	0.569333	0.383952	0.564552	0.536421	0.269833		2.42754	0.521212	0.456935
Glyma.06G205800		AGAMOUS-like 8		-2.21037	-4.29692	0.589699	0.200009	0.566742	0.057998	0.042646	0.193414	0	0.027695	0.028047	0.0157427	5.30658e-06	0.589699	0.200009	0.566742	0.057998	0.042646	0.193414	0	0.027695	0.028047		0.45215	0.0980193	0.0185807
Glyma.12G076800		cyclic nucleotide-gated channel 15		-2.20576	-2.3918	4.60923	3.82966	4.61172	0.697472	0.997509	1.13902	0.752925	0.836594	0.889011	1.35234e-29	6.53635e-49	4.60923	3.82966	4.61172	0.697472	0.997509	1.13902	0.752925	0.836594	0.889011		4.3502	0.944667	0.826177
Glyma.17G065100	XET	xyloglucan endotransglycosylase 6		-2.17823	-2.11281	13.6058	13.488	11.9358	2.88037	2.94253	2.83252	2.81872	2.65745	3.53152	3.08925e-62	4.10401e-48	13.6058	13.488	11.9358	2.88037	2.94253	2.83252	2.81872	2.65745	3.53152		13.0098	2.88514	3.00256
Glyma.05G030300		Major facilitator superfamily protein		-2.17594	-2.31047	0.316904	0.352885	0.271044	0.10056	0.072099	0.0364	0.07601	0.075523	0.038178	0.0021376	0.00100806	0.316904	0.352885	0.271044	0.10056	0.072099	0.0364	0.07601	0.075523	0.038178		0.313611	0.0696863	0.063237
Glyma.04G060900		0		-2.15482	-1.68306	0.599913	0.897187	0.807685	0.201835	0.233284	0.076737	0.154806	0.302378	0.262388	1.06671e-05	0.000177836	0.599913	0.897187	0.807685	0.201835	0.233284	0.076737	0.154806	0.302378	0.262388		0.768262	0.170619	0.239857
Glyma.01G151300		Major facilitator superfamily protein		-2.14935	-1.11881	1.00536	1.15993	1.04329	0.193593	0.261985	0.262238	0.685009	0.476389	0.305826	6.53386e-11	0.00593877	1.00536	1.15993	1.04329	0.193593	0.261985	0.262238	0.685009	0.476389	0.305826		1.06953	0.239272	0.489075
Glyma.16G148800		K+ uptake transporter 3		-2.13666	-2.06863	0.852653	0.573292	0.930269	0.184894	0.119028	0.230934	0.262835	0.063522	0.228859	3.48177e-07	5.52427e-05	0.852653	0.573292	0.930269	0.184894	0.119028	0.230934	0.262835	0.063522	0.228859		0.785405	0.178285	0.185072
Glyma.17G203400		Histone superfamily protein		-2.12787	-2.6297	1.57522	2.23267	0.870297	0.379743	0.487011	0.197084	0.268927	0.261641	0.198621	0.000821575	1.32598e-05	1.57522	2.23267	0.870297	0.379743	0.487011	0.197084	0.268927	0.261641	0.198621		1.5594	0.354613	0.243063
Glyma.06G088100	AHP	HPT phosphotransmitter 4	Encodes AHP4, a histidine-containing phosphotransmitter involved in Histidine (His)-to-Aspartate (Asp) phosphorelay signal transduction. AHP4 is one of the six Arabidopsis thaliana histidine phosphotransfer proteins (AHPs). AHPs function as redundant positive regulators of cytokinin signaling. Members of the AHP gene family include: AT3G21510 (AHP1), AT3G29350 (AHP2), AT5G39340 (AHP3), AT3G16360 …	-2.10911	-2.73228	0.925756	0.615965	1.96289	0.374069	0.314013	0.107485	0	0.225257	0.283103	0.0310109	0.0172563	0.925756	0.615965	1.96289	0.374069	0.314013	0.107485	0	0.225257	0.283103		1.1682	0.265189	0.169453
Glyma.19G188700		poly(A) binding protein 7		-2.09111	-1.67574	1.47394	1.56569	1.22125	0.198999	0.452095	0.321499	0.411685	0.466	0.421287	2.38129e-10	3.37374e-10	1.47394	1.56569	1.22125	0.198999	0.452095	0.321499	0.411685	0.466	0.421287		1.42029	0.324198	0.432991
Glyma.13G143100	SAUR	SAUR-like auxin-responsive protein family		-2.05365	-1.82158	0.475289	0.527753	0.628874	0.124126	0.225811	0.034046	0.169904	0.134441	0.154219	0.012661	0.00835512	0.475289	0.527753	0.628874	0.124126	0.225811	0.034046	0.169904	0.134441	0.154219		0.543972	0.127994	0.152855
Glyma.08G314700	FAD	fatty acid desaturase A		-2.05327	-1.54808	0.79559	0.64008	0.591744	0.15541	0.220073	0.116478	0.116017	0.305805	0.264229	0.00207646	0.0354017	0.79559	0.64008	0.591744	0.15541	0.220073	0.116478	0.116017	0.305805	0.264229		0.675805	0.163987	0.228684
Glyma.18G003200	XET	xyloglucan endotransglucosylase/hydrolase 16		-2.04684	-1.87436	17.7794	17.0203	17.7884	4.67232	4.05461	4.06176	4.37603	4.74155	5.19513	5.15561e-70	4.26657e-59	17.7794	17.0203	17.7884	4.67232	4.05461	4.06176	4.37603	4.74155	5.19513		17.5294	4.2629	4.7709
Glyma.02G092500		Uncharacterised protein family (UPF0497)		-2.04318	-1.86514	0.710941	0.77509	1.32121	0.218101	0.315562	0.153145	0.205966	0.357834	0.207075	0.00323691	0.0078281	0.710941	0.77509	1.32121	0.218101	0.315562	0.153145	0.205966	0.357834	0.207075		0.935747	0.228936	0.256958
Glyma.20G192700		cycloartenol synthase 1		-2.03354	-1.46564	2.41165	1.79964	3.08228	0.615518	0.545113	0.608873	0.692016	1.06072	0.879018	1.0715e-17	1.00507e-08	2.41165	1.79964	3.08228	0.615518	0.545113	0.608873	0.692016	1.06072	0.879018		2.43119	0.589835	0.87725
Glyma.09G261400		RNAhelicase-like 8		-2.03352	-1.74712	0.672558	0.954458	0.793146	0.161116	0.13841	0.15225	0.224107	0.193359	0.152817	2.18196e-06	3.81933e-05	0.672558	0.954458	0.793146	0.161116	0.13841	0.15225	0.224107	0.193359	0.152817		0.806721	0.150592	0.190094
Glyma.19G244300		calmodulin-like 11		-2.02144	-1.67805	0.980647	0.771501	0.461654	0.202018	0.07867	0.262781	0.307527	0.152588	0.229727	0.00596612	0.0163334	0.980647	0.771501	0.461654	0.202018	0.07867	0.262781	0.307527	0.152588	0.229727		0.737934	0.181156	0.229947
Glyma.10G072000		0		-1.9742	-2.04475	3.17933	2.98423	4.48636	1.39668	0.60446	0.726613	0.680684	1.1112	0.768018	1.30743e-07	5.3634e-10	3.17933	2.98423	4.48636	1.39668	0.60446	0.726613	0.680684	1.1112	0.768018		3.54998	0.909252	0.853302
Glyma.17G184900		Cobalamin-independent synthase family protein		-1.9544	-1.19123	0.933162	0.800187	0.873867	0.232037	0.226536	0.208583	0.435551	0.344335	0.352305	8.12868e-10	0.000307419	0.933162	0.800187	0.873867	0.232037	0.226536	0.208583	0.435551	0.344335	0.352305		0.869072	0.222385	0.377397
Glyma.09G054600		Ankyrin repeat family protein		-1.94961	-3.18521	0.384738	0.71427	0.673006	0.18473	0.243429	0.032532	0.032842	0	0.160601	0.0236319	0.0012172	0.384738	0.71427	0.673006	0.18473	0.243429	0.032532	0.032842	0	0.160601		0.590671	0.153564	0.064481
Glyma.02G233300		0		-1.94509	-1.62708	12.2005	10.9593	15.697	3.35046	3.2658	3.52021	3.67609	4.60766	4.27305	8.0144e-47	1.10874e-31	12.2005	10.9593	15.697	3.35046	3.2658	3.52021	3.67609	4.60766	4.27305		12.9522	3.37882	4.1856
Glyma.13G004400		zinc transporter 5 precursor		-1.92657	-1.66931	9.71451	10.3035	9.82012	2.12329	2.01827	3.73758	2.87986	3.10501	3.10082	1.84033e-06	1.02857e-46	9.71451	10.3035	9.82012	2.12329	2.01827	3.73758	2.87986	3.10501	3.10082		9.94604	2.62638	3.02856
Glyma.13G052100		AGAMOUS-like 8		-1.90919	-2.08867	1.15018	0.860084	1.49989	0.347658	0.381439	0.211	0.280904	0.165434	0.370332	1.22766e-06	3.7243e-07	1.15018	0.860084	1.49989	0.347658	0.381439	0.211	0.280904	0.165434	0.370332		1.17005	0.313366	0.272223
Glyma.11G060500		0		-1.89881	-1.4972	2.58009	2.09501	3.69235	0.890944	0.290748	1.05775	1.34256	1.01438	0.556048	0.000573957	0.00301078	2.58009	2.09501	3.69235	0.890944	0.290748	1.05775	1.34256	1.01438	0.556048		2.78915	0.746479	0.970995
Glyma.18G246100		basic helix-loop-helix (bHLH) DNA-binding superfamily protein		-1.88571	-2.04419	9.74702	10.025	13.5848	3.68791	2.71287	2.6776	2.14977	2.9996	2.92165	6.97139e-26	1.45043e-30	9.74702	10.025	13.5848	3.68791	2.71287	2.6776	2.14977	2.9996	2.92165		11.1189	3.02613	2.69034
Glyma.11G253900	XET	xyloglucan endotransglucosylase/hydrolase 16		-1.87259	-2.02387	22.1096	20.964	23.307	5.68676	5.34837	7.15761	5.60637	5.21519	5.46058	6.42961e-46	4.37859e-77	22.1096	20.964	23.307	5.68676	5.34837	7.15761	5.60637	5.21519	5.46058		22.1269	6.06425	5.42738
Glyma.01G129200		0		-1.85878	-2.48008	3.7366	3.40033	5.5097	1.35421	1.22709	0.915287	0.809159	0.889559	0.557063	2.00363e-10	4.93188e-16	3.7366	3.40033	5.5097	1.35421	1.22709	0.915287	0.809159	0.889559	0.557063		4.21554	1.16553	0.751927
Glyma.08G127600		RmlC-like cupins superfamily protein		-1.85718	-1.49805	7.50432	10.6265	9.00197	2.22661	2.49885	2.78547	3.45762	2.42935	3.70355	3.23914e-26	4.38315e-15	7.50432	10.6265	9.00197	2.22661	2.49885	2.78547	3.45762	2.42935	3.70355		9.04427	2.50365	3.19684
Glyma.14G119732		0		-1.84501	-2.32897	0.541647	1.46669	1.52982	0.442972	0.270107	0.263098	0.442065	0.182621	0.067142	0.000307078	0.00026101	0.541647	1.46669	1.52982	0.442972	0.270107	0.263098	0.442065	0.182621	0.067142		1.17939	0.325392	0.230609
Glyma.16G160200		ATP binding;nucleic acid binding;helicases		-1.83609	-1.92515	0.49774	0.254721	0.38452	0.183665	0.082412	0.051989	0.075614	0.141725	0.083634	0.00586344	0.00104306	0.49774	0.254721	0.38452	0.183665	0.082412	0.051989	0.075614	0.141725	0.083634		0.378994	0.106022	0.100324
Glyma.19G228400		nicotianamine synthase 2		-1.83526	-1.66412	6.87663	7.86228	8.18708	1.72479	2.61046	2.1093	3.03479	1.66285	2.5135	1.94682e-22	2.98013e-15	6.87663	7.86228	8.18708	1.72479	2.61046	2.1093	3.03479	1.66285	2.5135		7.64199	2.14818	2.40371
Glyma.16G175900	UDPGT	UDP-glucosyl transferase 88A1		-1.82826	-1.61784	1.14798	1.23538	1.09421	0.255875	0.536908	0.188976	0.329127	0.415861	0.375583	8.85061e-05	9.43766e-06	1.14798	1.23538	1.09421	0.255875	0.536908	0.188976	0.329127	0.415861	0.375583		1.15919	0.327253	0.373524
Glyma.04G251100		nodulin MtN21 /EamA-like transporter family protein		-1.82759	-1.3793	2.90387	2.51288	2.53407	1.01532	0.336435	0.900718	1.06544	0.873907	1.10438	2.84277e-07	4.05925e-09	2.90387	2.51288	2.53407	1.01532	0.336435	0.900718	1.06544	0.873907	1.10438		2.65027	0.750824	1.01458
Glyma.06G035300	CYP450	cytochrome P450, family 82, subfamily C, polypeptide 4		-1.82568	-1.88777	3.07234	3.29227	2.7324	0.703327	0.928068	0.936591	0.741669	0.830027	0.874886	1.41619e-17	1.63014e-20	3.07234	3.29227	2.7324	0.703327	0.928068	0.936591	0.741669	0.830027	0.874886		3.03234	0.855995	0.815527
Glyma.15G138000		0		-1.81781	-1.89312	3.65954	3.51481	3.12529	0.98696	1.10764	0.838963	1.11158	0.827618	0.815673	2.59986e-13	3.11589e-13	3.65954	3.51481	3.12529	0.98696	1.10764	0.838963	1.11158	0.827618	0.815673		3.43321	0.977854	0.918292
Glyma.16G176800		disease resistance family protein / LRR family protein		-1.81728	-1.61276	0.329178	0.379855	0.422941	0.123941	0.114636	0.138718	0.175951	0.180043	0.11208	3.80689e-07	3.31284e-05	0.329178	0.379855	0.422941	0.123941	0.114636	0.138718	0.175951	0.180043	0.11208		0.377325	0.125765	0.156025
Glyma.06G250300		Developmental regulator, ULTRAPETALA		-1.79998	-1.33569	1.57086	0.556892	1.13435	0.248434	0.255697	0.415288	0.355641	0.466274	0.471861	0.00161016	0.0204279	1.57086	0.556892	1.13435	0.248434	0.255697	0.415288	0.355641	0.466274	0.471861		1.08737	0.306473	0.431259
Glyma.12G223100		Seven transmembrane MLO family protein		-1.78736	-2.20146	1.3795	1.16561	0.996498	0.282988	0.3601	0.384245	0.15269	0.260566	0.351302	5.55862e-10	7.92275e-11	1.3795	1.16561	0.996498	0.282988	0.3601	0.384245	0.15269	0.260566	0.351302		1.18053	0.342444	0.254853
Glyma.17G171000		0		-1.78563	-2.35563	5.66998	5.19282	7.76369	1.51332	1.8134	2.08633	1.98889	0.818052	0.813747	1.67123e-12	4.28916e-12	5.66998	5.19282	7.76369	1.51332	1.8134	2.08633	1.98889	0.818052	0.813747		6.20883	1.80435	1.2069
Glyma.16G176600		Leucine-rich repeat transmembrane protein kinase		-1.77735	-2.65997	0.235231	0.2975	0.178861	0.036079	0.034374	0.135265	0.010772	0.053278	0.047363	0.0248498	0.000153775	0.235231	0.2975	0.178861	0.036079	0.034374	0.135265	0.010772	0.053278	0.047363		0.237197	0.0685727	0.0371377
Glyma.14G176400		Phosphate-responsive 1 family protein		-1.76757	-1.61619	36.6238	34.4906	30.6863	8.32227	11.3937	10.2841	10.7089	11.988	10.419	2.01789e-45	1.04992e-55	36.6238	34.4906	30.6863	8.32227	11.3937	10.2841	10.7089	11.988	10.419		33.9336	10	11.0386
Glyma.12G204100		0		-1.76672	-1.56174	15.7973	15.2178	18.3396	5.49668	4.15804	4.91144	5.66158	5.82186	5.17985	1.05532e-28	9.03529e-26	15.7973	15.2178	18.3396	5.49668	4.15804	4.91144	5.66158	5.82186	5.17985		16.4516	4.85539	5.55443
Glyma.17G117200		early nodulin-related		-1.76292	-1.38362	1.89208	2.1561	1.93294	0.439859	0.440636	0.770832	0.454435	0.860719	0.942675	3.10199e-06	0.000354327	1.89208	2.1561	1.93294	0.439859	0.440636	0.770832	0.454435	0.860719	0.942675		1.9937	0.550442	0.75261
Glyma.07G090400		0		-1.76046	-1.69316	3.30488	3.52108	3.82797	1.22287	1.24619	0.691163	1.26324	0.94008	1.07455	1.27558e-09	4.83189e-11	3.30488	3.52108	3.82797	1.22287	1.24619	0.691163	1.26324	0.94008	1.07455		3.55131	1.05341	1.09262
Glyma.14G195000		glutamine-dependent asparagine synthase 1		-1.75966	-1.81205	5.85339	6.61321	6.65297	1.83182	1.95446	1.88097	1.53112	2.13445	1.76581	1.00966e-37	1.28528e-30	5.85339	6.61321	6.65297	1.83182	1.95446	1.88097	1.53112	2.13445	1.76581		6.37319	1.88909	1.81046
Glyma.13G355200		Protein of unknown function (DUF1677)		-1.73781	-1.96274	1.93223	2.29335	3.87648	0.978993	0.42689	1.02924	0.805467	0.60699	0.657583	4.44913e-05	4.7376e-08	1.93223	2.29335	3.87648	0.978993	0.42689	1.02924	0.805467	0.60699	0.657583		2.70069	0.811708	0.690013
Glyma.15G066200		Cyclin D6;1		-1.7332	-1.59194	1.74425	1.62504	1.66621	0.252144	0.530067	0.726468	0.642373	0.454045	0.563788	2.22054e-06	1.65217e-09	1.74425	1.62504	1.66621	0.252144	0.530067	0.726468	0.642373	0.454045	0.563788		1.6785	0.502893	0.553402
Glyma.07G235000		molybdopterin biosynthesis MoaE family protein		-1.72641	-1.05518	1.12955	1.69724	1.48777	0.430091	0.4155	0.464035	0.708521	0.68583	0.666703	5.87845e-05	0.0206134	1.12955	1.69724	1.48777	0.430091	0.4155	0.464035	0.708521	0.68583	0.666703		1.43819	0.436542	0.687018
Glyma.06G064000		Integrase-type DNA-binding superfamily protein		-1.714	-1.59361	2.72486	3.79249	2.37501	1.18339	0.835641	0.711844	0.701987	1.51215	0.710139	1.9062e-07	3.52128e-05	2.72486	3.79249	2.37501	1.18339	0.835641	0.711844	0.701987	1.51215	0.710139		2.96412	0.910291	0.974759
Glyma.08G164400		zinc transporter 1 precursor		-1.71299	-1.80281	7.33123	8.18458	7.89905	2.54864	2.24366	2.38495	1.4144	2.38336	2.90323	3.84508e-31	1.03146e-16	7.33123	8.18458	7.89905	2.54864	2.24366	2.38495	1.4144	2.38336	2.90323		7.80495	2.39242	2.23366
Glyma.13G157600		callose synthase 5		-1.71134	-2.05755	0.541936	0.52864	0.679027	0.201548	0.144674	0.175868	0.307417	0.03284	0.060454	0.00701373	0.0235842	0.541936	0.52864	0.679027	0.201548	0.144674	0.175868	0.307417	0.03284	0.060454		0.583201	0.17403	0.13357
Glyma.08G171400		0		-1.71114	-1.84538	2.53384	2.31089	2.57124	1.08166	0.564504	0.652186	0.644964	0.565985	0.866309	0.000398312	6.6905e-05	2.53384	2.31089	2.57124	1.08166	0.564504	0.652186	0.644964	0.565985	0.866309		2.47199	0.766115	0.692419
Glyma.13G294200		0		-1.68691	-1.5662	8.81721	9.32445	13.5645	3.43637	4.18301	2.28299	2.81355	4.09336	3.7642	4.79647e-09	3.2596e-09	8.81721	9.32445	13.5645	3.43637	4.18301	2.28299	2.81355	4.09336	3.7642		10.5687	3.30079	3.55704
Glyma.20G091300		Low temperature and salt responsive protein family		-1.68091	-1.73168	37.7473	41.6153	45.18	13.6506	13.0463	12.3339	13.3328	11.8021	12.2675	4.07967e-52	8.74989e-53	37.7473	41.6153	45.18	13.6506	13.0463	12.3339	13.3328	11.8021	12.2675		41.5142	13.0103	12.4675
Glyma.12G185600		Protein of unknown function (DUF3049)		-1.67452	-1.75554	2.5479	2.49808	3.6572	0.903818	1.01613	0.818226	0.909831	0.927161	0.727397	1.8998e-12	4.64327e-13	2.5479	2.49808	3.6572	0.903818	1.01613	0.818226	0.909831	0.927161	0.727397		2.90106	0.912724	0.854796
Glyma.10G178400		calmodulin-like 11		-1.66679	-1.70445	7.03772	9.53851	8.62059	3.07669	2.28289	2.61964	1.87522	2.6071	3.23822	4.96051e-23	1.63424e-18	7.03772	9.53851	8.62059	3.07669	2.28289	2.61964	1.87522	2.6071	3.23822		8.39894	2.65974	2.57351
Glyma.11G083900		squamosa promoter binding protein-like 5		-1.66042	-1.47162	0.902599	0.91768	0.908061	0.426639	0.258551	0.173689	0.263034	0.213743	0.494722	0.000672266	0.00325732	0.902599	0.91768	0.908061	0.426639	0.258551	0.173689	0.263034	0.213743	0.494722		0.909447	0.286293	0.323833
Glyma.11G063400		PQ-loop repeat family protein / transmembrane family protein		-1.65428	-1.42292	2.54358	2.42134	3.89462	0.866459	0.804463	1.14129	0.90184	1.44703	0.961308	1.09912e-09	6.44251e-07	2.54358	2.42134	3.89462	0.866459	0.804463	1.14129	0.90184	1.44703	0.961308		2.95318	0.937404	1.10339
Glyma.06G295900		0		-1.65115	-1.57622	10.858	13.7372	16.5083	3.2173	6.43578	3.40515	3.30891	5.18931	5.16939	8.51513e-05	3.82535e-05	10.858	13.7372	16.5083	3.2173	6.43578	3.40515	3.30891	5.18931	5.16939		13.7012	4.35274	4.55587
Glyma.06G052000		iron regulated transporter 3		-1.64627	-1.63675	37.2302	37.6214	46.883	13.5297	12.0284	12.7214	13.5981	12.1154	12.7296	5.36509e-60	2.76174e-58	37.2302	37.6214	46.883	13.5297	12.0284	12.7214	13.5981	12.1154	12.7296		40.5782	12.7598	12.8144
Glyma.02G141900		alpha/beta-Hydrolases superfamily protein		-1.64449	-1.54748	43.7633	39.9491	37.5852	13.5101	11.7043	13.7745	14.1748	13.839	13.3926	2.28546e-70	4.37099e-78	43.7633	39.9491	37.5852	13.5101	11.7043	13.7745	14.1748	13.839	13.3926		40.4325	12.9963	13.8021
Glyma.17G104600		0		-1.64323	-1.72494	6.35292	5.86526	9.46925	1.76402	2.2251	2.97132	2.7076	1.32195	2.51327	2.31606e-09	5.27226e-09	6.35292	5.86526	9.46925	1.76402	2.2251	2.97132	2.7076	1.32195	2.51327		7.22914	2.32015	2.18094
Glyma.10G168100		ammonium transporter 1;2		-1.63527	-1.86888	3.15149	3.14357	3.02739	0.986325	0.979813	1.04376	0.783694	0.911036	0.848122	1.38355e-17	1.18967e-20	3.15149	3.14357	3.02739	0.986325	0.979813	1.04376	0.783694	0.911036	0.848122		3.10748	1.0033	0.847617
Glyma.13G094900	XET	Xyloglucan endotransglucosylase/hydrolase family protein		-1.63079	-1.62313	74.7607	74.1255	80.1916	22.773	23.373	28.1299	24.4831	27.0959	22.6052	1.00504e-66	2.98908e-82	74.7607	74.1255	80.1916	22.773	23.373	28.1299	24.4831	27.0959	22.6052		76.3593	24.7586	24.728
Glyma.02G142200		alpha/beta-Hydrolases superfamily protein		-1.63076	-1.38002	1.38787	1.57388	0.888284	0.508613	0.369691	0.358685	0.431003	0.687011	0.398962	2.18366e-06	0.000310316	1.38787	1.57388	0.888284	0.508613	0.369691	0.358685	0.431003	0.687011	0.398962		1.28334	0.41233	0.505659
Glyma.10G047100		aluminum sensitive 3		-1.61383	-1.95051	10.1728	11.0538	10.4464	4.39033	3.33116	2.69564	2.78192	3.07214	2.31122	3.43584e-19	3.90466e-34	10.1728	11.0538	10.4464	4.39033	3.33116	2.69564	2.78192	3.07214	2.31122		10.5577	3.47237	2.72176
Glyma.18G071100		translocation protein-related		-1.60854	-1.57928	13.0271	13.526	11.8834	4.60229	4.39059	3.67191	4.02655	4.79396	4.00211	1.01929e-32	1.18959e-31	13.0271	13.526	11.8834	4.60229	4.39059	3.67191	4.02655	4.79396	4.00211		12.8121	4.2216	4.27421
Glyma.16G173600		SLAC1 homologue 3		-1.60664	-2.98321	0.195984	0.291108	0.332913	0.067026	0.058421	0.141378	0.071527	0.031446	0	0.0321817	0.00165143	0.195984	0.291108	0.332913	0.067026	0.058421	0.141378	0.071527	0.031446	0		0.273335	0.0889417	0.0343243
Glyma.13G070300	CLS	Cellulose-synthase-like C4		-1.60608	-1.31666	5.7843	6.06368	4.90514	1.69267	2.10914	1.72192	2.13875	2.47984	2.08628	1.55551e-26	5.47406e-20	5.7843	6.06368	4.90514	1.69267	2.10914	1.72192	2.13875	2.47984	2.08628		5.58438	1.84124	2.23495
Glyma.16G100100		Bifunctional inhibitor/lipid-transfer protein/seed storage 2S albumin superfamily protein		-1.60065	-1.88127	1.50272	2.21035	3.10094	0.981771	0.92582	0.355366	0.329203	0.83093	0.69108	0.00373248	0.00029028	1.50272	2.21035	3.10094	0.981771	0.92582	0.355366	0.329203	0.83093	0.69108		2.27134	0.754319	0.617071
Glyma.04G055200		mechanosensitive channel of small conductance-like 10		-1.60035	-1.3451	1.44564	1.68525	1.61022	0.571559	0.359933	0.651712	0.431894	0.714183	0.714111	4.85685e-09	5.96594e-07	1.44564	1.68525	1.61022	0.571559	0.359933	0.651712	0.431894	0.714183	0.714111		1.58037	0.527735	0.620063
Glyma.07G194300		cytochrome P450, family 71, subfamily A, polypeptide 26		-1.59641	-1.52293	0.501073	0.602023	0.623841	0.083191	0.154788	0.329664	0.255754	0.153443	0.186722	0.0119583	0.00222719	0.501073	0.602023	0.623841	0.083191	0.154788	0.329664	0.255754	0.153443	0.186722		0.575646	0.189214	0.19864
Glyma.14G162100		highly ABA-induced PP2C gene 3		-1.58376	-1.64047	14.5213	12.8264	16.3856	4.74446	5.17437	4.73567	4.62357	3.64744	5.75122	1.34426e-34	9.04038e-25	14.5213	12.8264	16.3856	4.74446	5.17437	4.73567	4.62357	3.64744	5.75122		14.5778	4.88483	4.67408
Glyma.08G189300	LOX	lipoxygenase 1		-1.57796	-1.38408	6.1349	6.08513	5.98557	2.22997	2.01112	1.88725	2.52385	2.06266	2.37449	2.34644e-39	2.05763e-28	6.1349	6.08513	5.98557	2.22997	2.01112	1.88725	2.52385	2.06266	2.37449		6.06853	2.04278	2.32033
Glyma.19G233900		respiratory burst oxidase homolog B		-1.56915	-1.20703	1.57632	1.49693	1.39822	0.572653	0.478734	0.39354	0.554962	0.597063	0.729536	1.85837e-11	7.80452e-08	1.57632	1.49693	1.39822	0.572653	0.478734	0.39354	0.554962	0.597063	0.729536		1.49049	0.481642	0.627187
Glyma.07G084600		0		-1.56892	-1.78153	6.48158	5.88063	6.3498	1.5977	2.60499	2.11507	1.76454	1.69919	1.96414	8.59362e-15	3.86157e-27	6.48158	5.88063	6.3498	1.5977	2.60499	2.11507	1.76454	1.69919	1.96414		6.23734	2.10592	1.80929
Glyma.13G333400		C2H2-type zinc finger family protein		-1.5568	-1.40891	0.858386	0.677759	1.62839	0.30703	0.415074	0.357037	0.327724	0.342429	0.51911	0.014235	0.0330208	0.858386	0.677759	1.62839	0.30703	0.415074	0.357037	0.327724	0.342429	0.51911		1.05485	0.359714	0.396421
Glyma.18G141000		Kelch repeat-containing F-box family protein		-1.54175	-1.23566	0.967185	0.690331	0.930564	0.286676	0.271764	0.328048	0.590688	0.167612	0.333357	0.000423068	0.0400587	0.967185	0.690331	0.930564	0.286676	0.271764	0.328048	0.590688	0.167612	0.333357		0.862693	0.295496	0.363886
Glyma.17G117100		early nodulin-related		-1.53521	-1.37888	2.15609	2.78539	3.38162	1.00291	0.527958	1.33567	1.12359	1.08681	0.974912	0.000964009	0.000434172	2.15609	2.78539	3.38162	1.00291	0.527958	1.33567	1.12359	1.08681	0.974912		2.77437	0.955513	1.06177
Glyma.18G277500		0		-1.52249	-1.66351	3.53035	3.75801	4.44031	1.80742	1.16975	1.12424	0.864089	1.28808	1.54633	1.80316e-08	1.83599e-09	3.53035	3.75801	4.44031	1.80742	1.16975	1.12424	0.864089	1.28808	1.54633		3.90956	1.36714	1.23283
Glyma.01G134600		homogentisate phytyltransferase 1		-1.5078	-1.2566	1.64812	1.02691	1.56332	0.601246	0.541927	0.353854	0.429545	0.768447	0.566527	0.000178799	0.00281522	1.64812	1.02691	1.56332	0.601246	0.541927	0.353854	0.429545	0.768447	0.566527		1.41278	0.499009	0.588173
Glyma.06G101900		EXORDIUM like 2		-1.50345	-1.48001	8.10344	6.9448	5.90265	3.3398	2.18281	1.92176	2.69805	2.5938	2.18272	4.07323e-11	6.30099e-15	8.10344	6.9448	5.90265	3.3398	2.18281	1.92176	2.69805	2.5938	2.18272		6.98363	2.48146	2.49152
Glyma.07G035200		hydroxyproline-rich glycoprotein family protein		-1.49783	-1.32341	3.44044	3.55819	3.23081	1.02407	1.35472	1.25412	1.28364	1.40848	1.38332	4.04965e-25	1.56756e-26	3.44044	3.55819	3.23081	1.02407	1.35472	1.25412	1.28364	1.40848	1.38332		3.40981	1.21097	1.35848
Glyma.12G186200		NAC domain containing protein 90		-1.49737	-1.24036	1.77726	1.56226	0.805237	0.379985	0.652051	0.439951	0.307623	0.669969	0.769948	0.00347136	0.0300478	1.77726	1.56226	0.805237	0.379985	0.652051	0.439951	0.307623	0.669969	0.769948		1.38159	0.490662	0.582513
Glyma.14G185100		beta HLH protein 93		-1.49417	-3.36568	0.34838	0.609533	1.07243	0.151195	0.276098	0.299372	0.031945	0	0.160345	0.0431082	0.000344122	0.34838	0.609533	1.07243	0.151195	0.276098	0.299372	0.031945	0	0.160345		0.67678	0.242222	0.0640967
Glyma.09G100100		0		-1.48593	-2.01063	4.15794	0.930397	1.2834	0.507691	0.557392	0.372903	0.44678	0.400236	0.587743	0.000106655	5.98826e-06	4.15794	0.930397	1.2834	0.507691	0.557392	0.372903	0.44678	0.400236	0.587743		2.12391	0.479329	0.478253
Glyma.08G312000		spermidine hydroxycinnamoyl transferase		-1.48202	-1.38804	3.49418	3.91364	4.05797	1.29642	1.26278	1.55489	1.35098	1.96984	1.04243	3.65495e-16	5.29039e-09	3.49418	3.91364	4.05797	1.29642	1.26278	1.55489	1.35098	1.96984	1.04243		3.82193	1.37136	1.45442
Glyma.07G255400		mitogen-activated protein kinase 16		-1.47492	-1.36303	13.1133	13.3218	16.9531	5.01475	5.48305	5.3973	4.67799	5.84989	6.5495	1.58185e-36	1.66657e-25	13.1133	13.3218	16.9531	5.01475	5.48305	5.3973	4.67799	5.84989	6.5495		14.4627	5.29837	5.69246
Glyma.12G213700		gibberellin 2-oxidase 8		-1.46377	-2.38044	0.411068	0.523869	0.482201	0.194011	0.123905	0.193153	0.103707	0.071981	0.079118	0.0235739	0.000212517	0.411068	0.523869	0.482201	0.194011	0.123905	0.193153	0.103707	0.071981	0.079118		0.472379	0.170356	0.0849353
Glyma.11G025200		Remorin family protein		-1.4599	-1.36471	1.03705	1.74249	1.97983	0.637919	0.766771	0.419579	0.378426	0.717509	0.598755	0.00391024	0.0152869	1.03705	1.74249	1.97983	0.637919	0.766771	0.419579	0.378426	0.717509	0.598755		1.58646	0.60809	0.564897
Glyma.14G082900	CYP450	cytochrome P450, family 707, subfamily A, polypeptide 4		-1.45407	-1.37424	3.57781	2.99549	3.52588	1.18543	1.28073	1.23181	1.03618	1.66534	1.17833	3.52315e-13	8.22307e-09	3.57781	2.99549	3.52588	1.18543	1.28073	1.23181	1.03618	1.66534	1.17833		3.36639	1.23266	1.29328
Glyma.03G026000		Protein of unknown function (DUF1442)		-1.44925	-1.51432	5.81956	7.19855	7.02878	2.62038	2.27747	2.47948	2.06918	2.72305	2.20475	5.61328e-16	3.94628e-15	5.81956	7.19855	7.02878	2.62038	2.27747	2.47948	2.06918	2.72305	2.20475		6.68229	2.45911	2.33233
Glyma.17G049900		oxophytodienoate-reductase 3		-1.44486	-2.10706	1.84531	2.02277	1.84198	0.70253	0.7206	0.679473	0.369442	0.457746	0.487447	3.35597e-07	4.96618e-12	1.84531	2.02277	1.84198	0.70253	0.7206	0.679473	0.369442	0.457746	0.487447		1.90336	0.700868	0.438212
Glyma.09G235200		EXS (ERD1/XPR1/SYG1) family protein		-1.44079	-1.59171	6.06623	7.2123	6.03832	2.46593	2.55279	2.14979	2.09421	2.396	1.91366	1.95821e-27	5.6434e-30	6.06623	7.2123	6.03832	2.46593	2.55279	2.14979	2.09421	2.396	1.91366		6.43895	2.3895	2.13462
Glyma.19G240800	CYP450	cytochrome P450, family 78, subfamily A, polypeptide 5		-1.43546	-1.1184	1.06238	0.994081	0.588358	0.245151	0.161475	0.571566	0.620997	0.312988	0.280411	0.0150977	0.0359205	1.06238	0.994081	0.588358	0.245151	0.161475	0.571566	0.620997	0.312988	0.280411		0.881607	0.326064	0.404799
Glyma.15G234800		Phosphatidylinositol-4-phosphate 5-kinase family protein		-1.432	-1.42731	1.22561	1.09921	0.955835	0.508572	0.242606	0.46822	0.464863	0.373973	0.377593	2.18371e-05	2.93279e-07	1.22561	1.09921	0.955835	0.508572	0.242606	0.46822	0.464863	0.373973	0.377593		1.09355	0.406466	0.405476
Glyma.01G154000		0		-1.42965	-1.40253	1.80336	1.7914	1.12108	0.842886	0.468417	0.453645	0.676241	0.650117	0.443091	0.00121575	0.000795293	1.80336	1.7914	1.12108	0.842886	0.468417	0.453645	0.676241	0.650117	0.443091		1.57195	0.588316	0.589816
Glyma.18G281600		Cysteine proteinases superfamily protein		-1.42916	-1.13781	4.14602	4.5587	2.3651	1.20443	1.82382	1.09952	1.26313	1.72905	2.03317	6.61898e-09	1.30036e-06	4.14602	4.5587	2.3651	1.20443	1.82382	1.09952	1.26313	1.72905	2.03317		3.68994	1.37592	1.67512
Glyma.06G125800		Nodulin MtN3 family protein		-1.42428	-1.2833	2.95171	2.61684	3.74029	1.12399	0.908399	1.37523	1.36896	0.918657	1.47025	3.09323e-06	4.03361e-05	2.95171	2.61684	3.74029	1.12399	0.908399	1.37523	1.36896	0.918657	1.47025		3.10295	1.13587	1.25262
Glyma.01G211000		Glycosyl hydrolases family 32 protein		-1.42214	-1.5329	1.13279	1.26447	1.15222	0.343882	0.528547	0.455131	0.301115	0.445306	0.477358	7.45211e-07	1.45794e-07	1.13279	1.26447	1.15222	0.343882	0.528547	0.455131	0.301115	0.445306	0.477358		1.18316	0.44252	0.407926
Glyma.18G095100		GDSL-like Lipase/Acylhydrolase superfamily protein		-1.42042	-1.6501	1.07224	0.822935	0.596594	0.282227	0.36189	0.292123	0.187723	0.291552	0.308817	0.00416263	0.00116899	1.07224	0.822935	0.596594	0.282227	0.36189	0.292123	0.187723	0.291552	0.308817		0.83059	0.31208	0.262697
Glyma.11G002100		0		-1.41663	-1.7955	0.695847	1.11208	0.95653	0.438237	0.299505	0.307397	0.211821	0.313798	0.263812	0.00132502	4.28002e-05	0.695847	1.11208	0.95653	0.438237	0.299505	0.307397	0.211821	0.313798	0.263812		0.921485	0.34838	0.263144
Glyma.10G011000		glycerol-3-phosphate acyltransferase 3		-1.41498	-1.55753	9.80215	9.82383	8.98635	3.37902	3.55071	3.84375	3.38006	3.214	3.10258	3.49935e-33	3.30783e-41	9.80215	9.82383	8.98635	3.37902	3.55071	3.84375	3.38006	3.214	3.10258		9.53744	3.59116	3.23221
Glyma.20G211700		calmodulin-like 11		-1.41242	-1.50507	10.4583	12.0339	15.0637	4.30489	5.05079	4.81148	3.12403	5.32205	4.76989	3.07721e-15	1.61946e-12	10.4583	12.0339	15.0637	4.30489	5.05079	4.81148	3.12403	5.32205	4.76989		12.5186	4.72239	4.40532
Glyma.05G045300		RGA-like 1		-1.41123	-1.91098	0.391465	0.673696	0.852119	0.270872	0.174679	0.279548	0.103835	0.217483	0.181791	0.00727185	0.000330502	0.391465	0.673696	0.852119	0.270872	0.174679	0.279548	0.103835	0.217483	0.181791		0.639093	0.2417	0.167703
Glyma.18G182800		Haloacid dehalogenase-like hydrolase (HAD) superfamily protein		-1.40486	-2.16411	11.4229	9.34318	9.203	3.48314	4.37658	3.50075	2.20336	2.50586	1.9586	1.99607e-17	4.58028e-38	11.4229	9.34318	9.203	3.48314	4.37658	3.50075	2.20336	2.50586	1.9586		9.98969	3.78683	2.2226
Glyma.12G067000		cytochrome P450, family 93, subfamily D, polypeptide 1		-1.39789	-1.2404	8.47741	9.11452	11.0877	3.82702	3.7734	3.34054	3.88292	3.97338	4.25628	1.50303e-23	6.59147e-20	8.47741	9.11452	11.0877	3.82702	3.7734	3.34054	3.88292	3.97338	4.25628		9.55989	3.64699	4.03753
Glyma.10G251400		ROP-interactive CRIB motif-containing protein 1		-1.39751	-1.3158	9.79496	7.47086	8.23382	3.15427	3.09532	3.46858	3.18783	3.20304	3.83132	6.28103e-23	5.80687e-20	9.79496	7.47086	8.23382	3.15427	3.09532	3.46858	3.18783	3.20304	3.83132		8.49988	3.23939	3.4074
Glyma.18G099500		fatty acid desaturase A		-1.39272	-1.11132	2.65084	2.0029	1.64352	0.896681	0.732457	0.777215	0.815151	1.12441	0.964535	8.94035e-08	4.77831e-05	2.65084	2.0029	1.64352	0.896681	0.732457	0.777215	0.815151	1.12441	0.964535		2.09909	0.802118	0.968032
Glyma.16G044300		HXXXD-type acyl-transferase family protein		-1.39148	-1.59872	4.47057	5.24492	4.62311	2.33667	1.79212	1.37139	1.18782	1.54103	1.99221	5.06788e-11	1.42092e-14	4.47057	5.24492	4.62311	2.33667	1.79212	1.37139	1.18782	1.54103	1.99221		4.77953	1.83339	1.57368
Glyma.13G224400		Dynamin related protein 4C		-1.38809	-1.55753	0.213816	0.325615	0.374396	0.114304	0.08996	0.145325	0.135246	0.067101	0.108752	0.0228345	0.0129761	0.213816	0.325615	0.374396	0.114304	0.08996	0.145325	0.135246	0.067101	0.108752		0.304609	0.11653	0.1037
Glyma.15G161500		lectin protein kinase family protein		-1.3879	-1.38607	0.525709	1.06516	0.741881	0.392459	0.212465	0.290625	0.186767	0.355343	0.343655	0.00390489	0.00469903	0.525709	1.06516	0.741881	0.392459	0.212465	0.290625	0.186767	0.355343	0.343655		0.777583	0.298516	0.295255
Glyma.07G114200		Fatty acid hydroxylase superfamily		-1.38659	-1.19133	3.92055	3.96887	4.21272	1.85749	1.37343	1.4228	1.66315	1.98249	1.64136	1.36845e-15	5.04594e-13	3.92055	3.96887	4.21272	1.85749	1.37343	1.4228	1.66315	1.98249	1.64136		4.03405	1.55124	1.76234
Glyma.12G184800		0		-1.38307	-1.11552	3.5171	4.19395	5.13866	1.79794	1.77336	1.36621	1.64292	2.0146	2.2612	8.91841e-07	0.000110843	3.5171	4.19395	5.13866	1.79794	1.77336	1.36621	1.64292	2.0146	2.2612		4.28324	1.64584	1.97291
Glyma.06G265500		GRAS family transcription factor		-1.38191	-1.41067	6.52625	6.16212	7.13478	2.66423	2.47351	2.5036	2.65699	2.45283	2.32766	1.71318e-36	1.38931e-34	6.52625	6.16212	7.13478	2.66423	2.47351	2.5036	2.65699	2.45283	2.32766		6.60771	2.54711	2.47916
Glyma.06G044500		differentiation and greening-like 1		-1.37939	-1.11213	1.42836	2.25679	1.27827	0.544205	0.73946	0.622237	0.99575	0.953809	0.332309	0.00109796	0.0497953	1.42836	2.25679	1.27827	0.544205	0.73946	0.622237	0.99575	0.953809	0.332309		1.65447	0.635301	0.760623
Glyma.13G127500		multidrug resistance-associated protein 5		-1.37855	-1.39967	14.2349	11.61	15.3421	5.17472	5.19885	5.75228	5.47581	5.39805	4.79186	3.92237e-39	5.59121e-42	14.2349	11.61	15.3421	5.17472	5.19885	5.75228	5.47581	5.39805	4.79186		13.729	5.37528	5.22191
Glyma.02G208300		EXORDIUM like 2		-1.37597	-1.43415	10.3412	10.8704	9.8262	5.32829	3.43611	3.27689	3.95069	4.57692	2.91666	1.32914e-13	2.10823e-16	10.3412	10.8704	9.8262	5.32829	3.43611	3.27689	3.95069	4.57692	2.91666		10.3459	4.01376	3.81476
Glyma.09G021100	PEL	Pectin lyase-like superfamily protein		-1.37287	-1.36091	2.49838	2.00503	2.79438	1.23432	0.670058	0.924037	0.715581	1.00028	1.12019	1.10192e-05	3.83724e-06	2.49838	2.00503	2.79438	1.23432	0.670058	0.924037	0.715581	1.00028	1.12019		2.4326	0.942806	0.94535
Glyma.08G068800		HSP20-like chaperones superfamily protein		-1.3727	-1.33226	1.0719	1.60894	1.6105	0.660571	0.500823	0.500951	0.593231	0.336742	0.761729	0.00367551	0.0126847	1.0719	1.60894	1.6105	0.660571	0.500823	0.500951	0.593231	0.336742	0.761729		1.43045	0.554115	0.563901
Glyma.04G245000		Calcium-binding EF-hand family protein		-1.37015	-1.41402	0.913006	2.13864	1.64712	0.849612	0.705906	0.268191	0.704621	0.453165	0.588824	0.0426718	0.0140416	0.913006	2.13864	1.64712	0.849612	0.705906	0.268191	0.704621	0.453165	0.588824		1.56625	0.607903	0.582203
Glyma.18G267900		O-methyltransferase family protein		-1.36796	-1.76777	1.55316	1.53858	1.73989	0.518433	0.607464	0.752435	0.630552	0.470647	0.309442	9.33899e-05	5.72046e-06	1.55316	1.53858	1.73989	0.518433	0.607464	0.752435	0.630552	0.470647	0.309442		1.61055	0.626111	0.470214
Glyma.20G196900		Fe superoxide dismutase 2		-1.36454	-1.39642	179.996	185.547	185.058	71.6014	72.3774	70.9173	71.278	67.0542	70.4271	8.47318e-118	5.03576e-120	179.996	185.547	185.058	71.6014	72.3774	70.9173	71.278	67.0542	70.4271		183.534	71.6321	69.5864
Glyma.13G067900		glucosyl transferase family 8		-1.36429	-1.30772	1.77106	2.14018	1.64148	0.934957	0.55058	0.67876	0.641334	0.602758	0.997331	4.14551e-05	0.000126787	1.77106	2.14018	1.64148	0.934957	0.55058	0.67876	0.641334	0.602758	0.997331		1.85091	0.721432	0.747141
Glyma.17G085600		0		-1.35806	-1.43061	1.28207	1.62723	1.7803	0.750464	0.718749	0.374429	0.645645	0.559917	0.517737	0.00399111	0.000727703	1.28207	1.62723	1.7803	0.750464	0.718749	0.374429	0.645645	0.559917	0.517737		1.5632	0.614547	0.574433
Glyma.11G095600		hexokinase-like 1		-1.35648	-1.38653	13.3209	12.7554	13.4354	5.1953	5.32586	4.98123	4.83803	5.18003	5.06331	1.84991e-48	3.86525e-50	13.3209	12.7554	13.4354	5.1953	5.32586	4.98123	4.83803	5.18003	5.06331		13.1706	5.16747	5.02712
Glyma.14G176300		Phosphate-responsive 1 family protein		-1.35271	-1.3644	48.4432	47.6971	38.9886	19.5322	17.4436	16.2315	18.1639	16.2747	17.9357	1.23076e-36	1.93883e-41	48.4432	47.6971	38.9886	19.5322	17.4436	16.2315	18.1639	16.2747	17.9357		45.043	17.7358	17.4581
Glyma.14G222700		Prolyl oligopeptidase family protein		-1.34625	-1.33445	30.0629	29.3444	32.4126	12.1069	12.2202	12.9186	12.2629	12.5471	10.9163	1.13518e-66	1.11341e-69	30.0629	29.3444	32.4126	12.1069	12.2202	12.9186	12.2629	12.5471	10.9163		30.6066	12.4152	11.9088
Glyma.08G144433		Phosphoglycerate mutase family protein		-1.34444	-1.44041	7.1395	7.61243	11.2169	3.76855	3.54055	2.93692	4.15045	2.44833	2.92911	3.73901e-06	6.16798e-06	7.1395	7.61243	11.2169	3.76855	3.54055	2.93692	4.15045	2.44833	2.92911		8.65626	3.41534	3.17596
Glyma.09G033800		0		-1.33913	-1.35794	7.89619	7.71068	10.2229	4.12374	2.67025	3.47286	2.91495	2.86758	4.28516	1.79564e-12	1.09809e-12	7.89619	7.71068	10.2229	4.12374	2.67025	3.47286	2.91495	2.86758	4.28516		8.60991	3.42229	3.3559
Glyma.13G139300		0		-1.33879	-1.02023	1.07675	1.375	1.25002	0.784406	0.217421	0.46654	0.590979	0.499975	0.733195	0.00722361	0.00579565	1.07675	1.375	1.25002	0.784406	0.217421	0.46654	0.590979	0.499975	0.733195		1.23393	0.489456	0.60805
Glyma.06G039000		Protein phosphatase 2C family protein		-1.33823	-1.24271	9.55719	9.8178	8.64851	3.54068	3.8834	3.70075	3.49435	3.92933	4.39933	4.97602e-30	3.52847e-23	9.55719	9.8178	8.64851	3.54068	3.8834	3.70075	3.49435	3.92933	4.39933		9.34117	3.70828	3.941
Glyma.20G197000		Integrase-type DNA-binding superfamily protein		-1.33363	-1.32755	0.785514	0.778761	0.67426	0.321024	0.281666	0.282097	0.273813	0.379644	0.234827	0.00440896	0.00898544	0.785514	0.778761	0.67426	0.321024	0.281666	0.282097	0.273813	0.379644	0.234827		0.746178	0.294929	0.296095
Glyma.15G134900		Major facilitator superfamily protein		-1.33358	-1.02837	1.51371	1.35809	1.70897	0.52954	0.516965	0.771581	0.526337	0.898506	0.816746	7.04021e-05	0.00426135	1.51371	1.35809	1.70897	0.52954	0.516965	0.771581	0.526337	0.898506	0.816746		1.52692	0.606029	0.747196
Glyma.03G101700		Fatty acid hydroxylase superfamily		-1.33273	-1.4623	14.9483	15.9223	16.0492	6.96774	5.53563	6.15089	5.92967	5.50882	5.37198	3.8278e-34	1.83627e-49	14.9483	15.9223	16.0492	6.96774	5.53563	6.15089	5.92967	5.50882	5.37198		15.6399	6.21809	5.60349
Glyma.06G102000		Phosphate-responsive 1 family protein		-1.33073	-1.202	15.2625	17.6747	14.2059	6.41902	6.41279	6.00402	7.08268	6.81919	6.53659	2.75276e-31	9.60064e-26	15.2625	17.6747	14.2059	6.41902	6.41279	6.00402	7.08268	6.81919	6.53659		15.7144	6.27861	6.81282
Glyma.12G238300		0		-1.32672	-1.35947	7.35604	9.5979	8.33168	4.1925	2.75792	3.16031	2.98621	3.32508	3.50313	6.71417e-08	1.50917e-09	7.35604	9.5979	8.33168	4.1925	2.75792	3.16031	2.98621	3.32508	3.50313		8.42854	3.37024	3.27148
Glyma.13G072000		spermidine hydroxycinnamoyl transferase		-1.31315	-1.23664	10.3522	9.68415	11.5777	4.23081	4.35869	4.18491	4.32732	4.49202	4.55402	1.29374e-16	9.33478e-15	10.3522	9.68415	11.5777	4.23081	4.35869	4.18491	4.32732	4.49202	4.55402		10.538	4.25814	4.45779
Glyma.10G051900		0		-1.31272	-1.1825	2.31554	1.99493	2.11426	0.910012	0.832464	0.85279	0.99956	0.685635	1.14075	3.63659e-16	1.11291e-08	2.31554	1.99493	2.11426	0.910012	0.832464	0.85279	0.99956	0.685635	1.14075		2.14158	0.865089	0.941982
Glyma.07G181600		K-box region and MADS-box transcription factor family protein		-1.30781	-1.44428	4.80858	6.20531	7.35401	2.52695	2.68469	2.48298	2.66389	1.7	2.90742	3.15703e-12	8.15986e-10	4.80858	6.20531	7.35401	2.52695	2.68469	2.48298	2.66389	1.7	2.90742		6.12263	2.56487	2.42377
Glyma.10G071000		purple acid phosphatase 22		-1.3066	-1.41969	2.21132	2.09893	2.37877	0.720211	1.51666	0.481174	0.717349	0.9867	0.785551	0.00153575	5.30844e-08	2.21132	2.09893	2.37877	0.720211	1.51666	0.481174	0.717349	0.9867	0.785551		2.22967	0.906014	0.829867
Glyma.01G001800		Leucine-rich repeat protein kinase family protein		-1.30423	-1.27928	0.533134	0.415879	0.495052	0.123459	0.281344	0.168937	0.195866	0.204327	0.183617	0.016332	0.0062375	0.533134	0.415879	0.495052	0.123459	0.281344	0.168937	0.195866	0.204327	0.183617		0.481355	0.191247	0.194603
Glyma.04G231351		0		-1.30285	-1.63995	0.591907	0.593884	0.618712	0.168681	0.365321	0.221639	0.251466	0.139779	0.235683	0.0102498	0.000769862	0.591907	0.593884	0.618712	0.168681	0.365321	0.221639	0.251466	0.139779	0.235683		0.601501	0.25188	0.208976
Glyma.13G304400	XET	xyloglucan endotransglucosylase/hydrolase 9		-1.30216	-1.31224	190.197	191.828	189.336	77.0349	77.4771	78.3167	78.2141	77.6161	73.7613	1.23791e-116	8.74934e-110	190.197	191.828	189.336	77.0349	77.4771	78.3167	78.2141	77.6161	73.7613		190.454	77.6095	76.5305
Glyma.14G121400		Plant stearoyl-acyl-carrier-protein desaturase family protein		-1.30022	-1.41716	1.67396	1.77064	1.85519	0.472639	0.744943	0.929606	0.523362	0.651708	0.804417	6.93136e-05	8.141e-07	1.67396	1.77064	1.85519	0.472639	0.744943	0.929606	0.523362	0.651708	0.804417		1.7666	0.715729	0.659829
Glyma.14G012100	TPT	Nucleotide/sugar transporter family protein		-1.29561	-1.54547	1.85474	1.5016	1.38059	0.634118	0.437359	0.852538	0.555926	0.375761	0.686331	0.000276762	5.68178e-06	1.85474	1.5016	1.38059	0.634118	0.437359	0.852538	0.555926	0.375761	0.686331		1.57898	0.641338	0.539339
Glyma.18G247800		cyclin p4;1		-1.28651	-1.07635	11.0558	10.2049	10.6021	4.5205	4.60667	3.98891	5.43862	5.07301	4.56957	1.26116e-14	4.47189e-10	11.0558	10.2049	10.6021	4.5205	4.60667	3.98891	5.43862	5.07301	4.56957		10.6209	4.37202	5.02707
Glyma.11G198300		AMP-dependent synthetase and ligase family protein		-1.28105	-1.1205	2.80872	2.86145	2.981	1.29524	1.31212	0.970286	1.71192	1.02744	1.22912	6.09688e-10	3.16772e-06	2.80872	2.86145	2.981	1.29524	1.31212	0.970286	1.71192	1.02744	1.22912		2.88373	1.19255	1.32282
Glyma.11G161600		Peroxidase superfamily protein		-1.27973	-1.17728	14.9624	14.8388	11.7262	6.32959	5.37415	5.4974	6.77566	6.27189	5.25953	1.31805e-19	5.80157e-15	14.9624	14.8388	11.7262	6.32959	5.37415	5.4974	6.77566	6.27189	5.25953		13.8425	5.73371	6.10236
Glyma.13G258100		0		-1.27918	-1.34496	32.2493	39.7507	26.8739	16.0428	12.4903	12.4297	12.1737	12.2042	14.4601	1.19558e-14	5.86219e-18	32.2493	39.7507	26.8739	16.0428	12.4903	12.4297	12.1737	12.2042	14.4601		32.9579	13.6542	12.946
Glyma.12G227700		Basic-leucine zipper (bZIP) transcription factor family protein		-1.26983	-1.35768	13.5865	13.817	11.5576	5.36987	5.5881	5.27791	5.29249	4.96038	4.90835	2.77284e-29	1.4489e-32	13.5865	13.817	11.5576	5.36987	5.5881	5.27791	5.29249	4.96038	4.90835		12.987	5.41196	5.05374
Glyma.09G276600		SOS3-interacting protein 4		-1.26908	-1.26929	2.68321	3.56666	3.79981	1.63014	1.28942	1.27261	1.27412	1.66562	1.21602	3.77877e-09	1.46275e-08	2.68321	3.56666	3.79981	1.63014	1.28942	1.27261	1.27412	1.66562	1.21602		3.34989	1.39739	1.38525
Glyma.13G272500		Basic-leucine zipper (bZIP) transcription factor family protein		-1.26736	-1.05993	9.81405	10.2943	7.77949	4.11308	3.68079	3.83642	4.52763	4.45218	4.3499	4.44532e-19	3.19213e-14	9.81405	10.2943	7.77949	4.11308	3.68079	3.83642	4.52763	4.45218	4.3499		9.29595	3.87676	4.44324
Glyma.07G015600	AHP	HPT phosphotransmitter 4		-1.26627	-1.76543	1.60235	1.69824	2.50718	0.593003	0.948329	0.877176	0.680852	0.48922	0.52165	0.000924988	1.16878e-06	1.60235	1.69824	2.50718	0.593003	0.948329	0.877176	0.680852	0.48922	0.52165		1.93593	0.806169	0.563907
Glyma.08G007400		Sec14p-like phosphatidylinositol transfer family protein		-1.2628	-1.72676	1.01003	1.98931	1.47551	0.61668	0.766904	0.480545	0.553988	0.252476	0.540716	0.012208	0.00101616	1.01003	1.98931	1.47551	0.61668	0.766904	0.480545	0.553988	0.252476	0.540716		1.49162	0.621376	0.44906
Glyma.13G230100		TRICHOME BIREFRINGENCE-LIKE 21		-1.26055	-1.25469	11.4923	9.97208	8.19988	4.27732	4.96531	3.19897	5.48664	3.83941	3.04645	2.06079e-11	2.85708e-09	11.4923	9.97208	8.19988	4.27732	4.96531	3.19897	5.48664	3.83941	3.04645		9.88809	4.1472	4.12417
Glyma.04G056133		P-type ATPase of Arabidopsis 2		-1.25783	-1.37726	1.98108	2.06392	2.58476	1.14763	1.03809	0.610409	1.013	0.661019	0.866399	0.000107894	3.11227e-06	1.98108	2.06392	2.58476	1.14763	1.03809	0.610409	1.013	0.661019	0.866399		2.20992	0.932042	0.846805
Glyma.06G295800		0		-1.24885	-1.4169	10.9544	10.151	14.1185	6.44217	3.89202	4.58294	4.38345	4.47829	4.29878	5.81007e-07	2.90372e-11	10.9544	10.151	14.1185	6.44217	3.89202	4.58294	4.38345	4.47829	4.29878		11.7413	4.97238	4.38684
Glyma.06G246800		Seven transmembrane MLO family protein		-1.24537	-1.62523	0.328056	0.418838	0.278209	0.134448	0.181356	0.095106	0.076133	0.098972	0.141645	0.0365038	0.00483958	0.328056	0.418838	0.278209	0.134448	0.181356	0.095106	0.076133	0.098972	0.141645		0.341701	0.13697	0.105583
Glyma.03G175800		aluminum sensitive 3		-1.24145	-1.20409	6.28912	6.98692	7.33705	2.7456	2.62734	3.38164	2.55092	3.63156	2.73817	8.37765e-11	3.25913e-09	6.28912	6.98692	7.33705	2.7456	2.62734	3.38164	2.55092	3.63156	2.73817		6.87103	2.9182	2.97355
Glyma.08G295600		thioredoxin 2		-1.24133	-1.21095	4.72406	3.90971	5.70536	2.59661	1.57872	1.92808	2.67592	1.90832	1.58089	1.32344e-05	4.084e-05	4.72406	3.90971	5.70536	2.59661	1.57872	1.92808	2.67592	1.90832	1.58089		4.77971	2.03447	2.05505
Glyma.05G160900		0		-1.23956	-1.14953	6.13376	6.75456	7.92639	3.21103	3.11123	2.53977	3.47179	2.79346	3.08645	9.72478e-10	1.5927e-08	6.13376	6.75456	7.92639	3.21103	3.11123	2.53977	3.47179	2.79346	3.08645		6.93824	2.95401	3.11723
Glyma.16G007700		germin-like protein 1		-1.23526	-1.21071	439.249	433.341	428.214	173.137	185.319	196.531	187.528	193.275	180.025	1.15936e-73	3.46768e-98	439.249	433.341	428.214	173.137	185.319	196.531	187.528	193.275	180.025		433.601	184.995	186.943
Glyma.03G005400		MATE efflux family protein		-1.23379	-1.27846	31.4015	32.9332	38.3209	15.774	14.294	13.8245	14.3942	14.5526	13.2767	2.03883e-37	2.03144e-41	31.4015	32.9332	38.3209	15.774	14.294	13.8245	14.3942	14.5526	13.2767		34.2185	14.6308	14.0745
Glyma.06G064400		Protein kinase superfamily protein		-1.23302	-1.11631	2.23315	2.18652	2.77286	1.28287	0.929177	0.864247	1.05527	1.31614	0.941618	4.47908e-07	3.9466e-06	2.23315	2.18652	2.77286	1.28287	0.929177	0.864247	1.05527	1.31614	0.941618		2.39751	1.02543	1.10434
Glyma.10G248400		with no lysine (K) kinase 1		-1.2313	-1.06217	5.76323	7.17971	7.0544	2.95003	2.80867	2.79636	2.85565	3.54529	3.14614	4.63675e-23	2.46847e-15	5.76323	7.17971	7.0544	2.95003	2.80867	2.79636	2.85565	3.54529	3.14614		6.66578	2.85169	3.18236
Glyma.16G148300		spermidine hydroxycinnamoyl transferase		-1.22874	-1.10668	0.854397	0.865173	0.8175	0.300622	0.405401	0.372918	0.335421	0.429946	0.408482	0.00365254	0.0106247	0.854397	0.865173	0.8175	0.300622	0.405401	0.372918	0.335421	0.429946	0.408482		0.84569	0.359647	0.391283
Glyma.08G144500		DNAse I-like superfamily protein		-1.2255	-1.02804	9.45216	9.62865	11.2639	4.66219	4.1161	4.24128	4.61808	4.5781	5.66939	4.03415e-08	1.21826e-05	9.45216	9.62865	11.2639	4.66219	4.1161	4.24128	4.61808	4.5781	5.66939		10.1149	4.33985	4.95519
Glyma.18G273600		AGAMOUS-like 8		-1.22307	-1.7599	0.836684	0.688069	1.38134	0.281456	0.409466	0.524556	0.310156	0.246032	0.285177	0.0422805	0.00123552	0.836684	0.688069	1.38134	0.281456	0.409466	0.524556	0.310156	0.246032	0.285177		0.968696	0.405159	0.280455
Glyma.06G036600		0		-1.22156	-1.17287	3.41105	3.22932	3.0413	1.58242	1.03778	1.5458	1.20677	1.2584	1.82178	1.61692e-07	4.78328e-07	3.41105	3.22932	3.0413	1.58242	1.03778	1.5458	1.20677	1.2584	1.82178		3.22722	1.38867	1.42899
Glyma.02G126600		0		-1.21933	-1.52728	1.75795	1.54262	1.24123	0.601249	0.721981	0.630439	0.614303	0.573841	0.375087	0.000216037	2.04632e-05	1.75795	1.54262	1.24123	0.601249	0.721981	0.630439	0.614303	0.573841	0.375087		1.51394	0.651223	0.521077
Glyma.11G178300		calmodulin-binding receptor-like cytoplasmic kinase 1		-1.21894	-1.04278	8.79593	9.48373	12.9673	5.04393	4.88953	3.57461	4.7028	4.4762	5.97569	9.04404e-12	9.27578e-10	8.79593	9.48373	12.9673	5.04393	4.88953	3.57461	4.7028	4.4762	5.97569		10.4156	4.50269	5.05156
Glyma.13G316500		0		-1.21549	-1.35848	2.66449	4.01873	4.72717	2.58005	0.919656	1.45487	1.18363	2.04353	1.20469	0.0089781	0.000515812	2.66449	4.01873	4.72717	2.58005	0.919656	1.45487	1.18363	2.04353	1.20469		3.80346	1.65153	1.47728
Glyma.09G016500		0		-1.21519	-1.46479	1.44103	2.28923	2.98177	0.925603	0.767103	0.786549	0.904572	0.464633	0.831375	0.000828281	0.000209509	1.44103	2.28923	2.98177	0.925603	0.767103	0.786549	0.904572	0.464633	0.831375		2.23734	0.826418	0.733527
Glyma.20G241800		Peroxidase superfamily protein		-1.21458	-1.39744	1.58381	1.41511	1.33427	0.83761	0.49952	0.53324	0.682661	0.628079	0.325224	0.00108541	0.000544329	1.58381	1.41511	1.33427	0.83761	0.49952	0.53324	0.682661	0.628079	0.325224		1.44439	0.623457	0.545321
Glyma.16G200800	GA20ox7	gibberellin 20 oxidase 2		-1.2125	-1.46248	1.3759	0.908229	1.14369	0.499314	0.548598	0.440641	0.438421	0.396307	0.40315	0.00155223	0.000113548	1.3759	0.908229	1.14369	0.499314	0.548598	0.440641	0.438421	0.396307	0.40315		1.14261	0.496184	0.412626
Glyma.05G242600		0		-1.20922	-1.23653	20.661	20.4937	20.141	9.46628	9.30543	7.8895	9.03985	8.49094	8.42697	3.89261e-33	4.34147e-41	20.661	20.4937	20.141	9.46628	9.30543	7.8895	9.03985	8.49094	8.42697		20.4319	8.88707	8.65259
Glyma.12G137100		Protein kinase superfamily protein		-1.20578	-1.09856	4.00822	4.25145	4.25182	1.57217	1.85003	1.95256	2.00591	1.80435	2.05895	1.15013e-13	1.04346e-12	4.00822	4.25145	4.25182	1.57217	1.85003	1.95256	2.00591	1.80435	2.05895		4.1705	1.79159	1.9564
Glyma.01G131200		0		-1.20388	-1.1399	3.71663	3.44972	3.17789	1.53581	1.58017	1.39516	1.70377	1.11767	1.86564	9.77206e-08	2.5837e-05	3.71663	3.44972	3.17789	1.53581	1.58017	1.39516	1.70377	1.11767	1.86564		3.44808	1.50372	1.56236
Glyma.16G020800	SAUR	SAUR-like auxin-responsive protein family		-1.19913	-1.02114	2.73053	2.48526	2.30367	1.12091	1.28141	0.880408	1.48283	0.810546	1.39472	0.00215228	0.0207649	2.73053	2.48526	2.30367	1.12091	1.28141	0.880408	1.48283	0.810546	1.39472		2.50648	1.09424	1.22937
Glyma.08G037900		RHO guanyl-nucleotide exchange factor 11		-1.19704	-1.27979	4.78336	5.84196	5.00522	2.42524	2.69322	1.74568	2.24614	1.85398	2.33333	1.61026e-06	2.56823e-08	4.78336	5.84196	5.00522	2.42524	2.69322	1.74568	2.24614	1.85398	2.33333		5.21018	2.28805	2.14448
Glyma.12G197600	XET	xyloglucan endotransglucosylase/hydrolase 9		-1.19662	-1.18714	111.745	117.076	99.2932	46.2738	46.948	50.5842	47.3941	47.4662	48.97	9.93569e-48	1.26621e-56	111.745	117.076	99.2932	46.2738	46.948	50.5842	47.3941	47.4662	48.97		109.372	47.9354	47.9434
Glyma.13G152780		homogentisate phytyltransferase 1		-1.19261	-1.32537	17.4395	15.9785	15.6219	6.99469	6.59859	7.33982	6.12471	6.88921	5.63477	1.13211e-40	1.45261e-40	17.4395	15.9785	15.6219	6.99469	6.59859	7.33982	6.12471	6.88921	5.63477		16.3467	6.9777	6.21623
Glyma.05G230400		RHO guanyl-nucleotide exchange factor 11		-1.19047	-1.15689	1.76526	1.36416	1.81549	0.993084	0.705263	0.481385	0.933916	0.757531	0.495878	0.014722	0.0177665	1.76526	1.36416	1.81549	0.993084	0.705263	0.481385	0.933916	0.757531	0.495878		1.6483	0.726577	0.729108
Glyma.10G161000		N-MYC downregulated-like 1		-1.18931	-1.32415	12.4353	12.0739	12.7177	5.28451	5.6074	5.49776	5.21695	4.11028	5.50718	5.15426e-26	7.47416e-23	12.4353	12.0739	12.7177	5.28451	5.6074	5.49776	5.21695	4.11028	5.50718		12.409	5.46322	4.94481
Glyma.05G166900		cytochrome P450, family 716, subfamily A, polypeptide 1		-1.18287	-1.13802	1.24925	0.95564	1.71041	0.735467	0.415663	0.579472	0.633263	0.65293	0.482805	0.00338216	0.00303291	1.24925	0.95564	1.71041	0.735467	0.415663	0.579472	0.633263	0.65293	0.482805		1.3051	0.576867	0.589666
Glyma.06G026300		glyoxal oxidase-related protein		-1.17946	-1.20212	1.58238	1.39116	1.71897	0.737449	0.749468	0.596249	0.751528	0.549016	0.732951	1.82058e-05	2.91396e-05	1.58238	1.39116	1.71897	0.737449	0.749468	0.596249	0.751528	0.549016	0.732951		1.56417	0.694389	0.677832
Glyma.05G152500		HXXXD-type acyl-transferase family protein		-1.17859	-1.25181	29.8333	30.8214	28.789	13.6077	12.5177	13.5798	11.421	13.9547	12.0981	1.37492e-44	7.08274e-39	29.8333	30.8214	28.789	13.6077	12.5177	13.5798	11.421	13.9547	12.0981		29.8145	13.2351	12.4913
Glyma.10G193500		Fe superoxide dismutase 2		-1.17582	-1.23677	107.812	110.634	114.546	48.6292	51.2513	48.2368	49.2403	47.1672	44.5688	5.03575e-66	6.11456e-67	107.812	110.634	114.546	48.6292	51.2513	48.2368	49.2403	47.1672	44.5688		110.997	49.3724	46.9921
Glyma.15G026900		hydroxyproline-rich glycoprotein family protein		-1.17439	-1.44119	0.780683	0.787379	0.819602	0.422429	0.325888	0.311196	0.151277	0.423566	0.298946	0.00967818	0.00798524	0.780683	0.787379	0.819602	0.422429	0.325888	0.311196	0.151277	0.423566	0.298946		0.795888	0.353171	0.291263
Glyma.02G040700		uncoupling protein 5		-1.17267	-1.17663	40.3181	43.811	37.8865	16.8106	17.989	19.5559	18.173	18.6667	17.0175	1.58626e-38	1.13957e-46	40.3181	43.811	37.8865	16.8106	17.989	19.5559	18.173	18.6667	17.0175		40.6719	18.1185	17.9524
Glyma.17G089500		Protein of unknown function (DUF1645)		-1.16987	-1.0292	0.993226	1.35221	0.936562	0.61235	0.436712	0.413232	0.462053	0.447136	0.699291	0.00406056	0.0172037	0.993226	1.35221	0.936562	0.61235	0.436712	0.413232	0.462053	0.447136	0.699291		1.094	0.487431	0.53616
Glyma.20G223800		N-MYC downregulated-like 1		-1.16486	-1.2573	25.6573	25.3687	30.2772	14.2141	11.0983	11.1632	10.3362	11.3692	12.2557	7.96598e-23	1.6701e-33	25.6573	25.3687	30.2772	14.2141	11.0983	11.1632	10.3362	11.3692	12.2557		27.101	12.1585	11.3204
Glyma.08G144367	NAT	Acyl-CoA N-acyltransferases (NAT) superfamily protein		-1.16341	-1.18825	3.13818	3.33795	4.59841	1.23124	1.57659	2.13045	1.46966	1.47703	1.89262	0.00119911	0.000278822	3.13818	3.33795	4.59841	1.23124	1.57659	2.13045	1.46966	1.47703	1.89262		3.69152	1.64609	1.6131
Glyma.19G250167		0		-1.16289	-1.14372	66.4915	66.9584	62.5282	29.6356	30.5123	27.7979	30.2477	28.8155	29.4475	3.50412e-42	3.64629e-43	66.4915	66.9584	62.5282	29.6356	30.5123	27.7979	30.2477	28.8155	29.4475		65.326	29.3152	29.5036
Glyma.20G067400		early nodulin-like protein 8		-1.16225	-1.3009	2.88904	2.07397	2.59007	1.05864	1.34819	0.977435	1.05945	1.3481	0.640883	9.19166e-05	0.000214078	2.88904	2.07397	2.59007	1.05864	1.34819	0.977435	1.05945	1.3481	0.640883		2.51769	1.12809	1.01614
Glyma.06G265700		NAD(P)-binding Rossmann-fold superfamily protein		-1.16189	-1.40671	9.69161	10.2742	11.6869	4.65953	4.69025	4.85185	3.38829	4.02692	4.49721	1.99255e-18	1.56543e-21	9.69161	10.2742	11.6869	4.65953	4.69025	4.85185	3.38829	4.02692	4.49721		10.5509	4.73388	3.9708
Glyma.09G181000		chlorophyllase 1		-1.15699	-1.17498	10.7588	10.9332	8.46394	4.83308	5.16626	3.5992	4.8328	3.7662	4.73302	1.19697e-10	1.8523e-12	10.7588	10.9332	8.46394	4.83308	5.16626	3.5992	4.8328	3.7662	4.73302		10.052	4.53285	4.44401
Glyma.17G081200		AGAMOUS-like 8		-1.14978	-1.12396	14.0174	12.4929	18.1492	7.05116	6.64387	6.55515	6.37346	6.5038	7.56361	3.99911e-13	2.75419e-12	14.0174	12.4929	18.1492	7.05116	6.64387	6.55515	6.37346	6.5038	7.56361		14.8865	6.75006	6.81362
Glyma.06G050500		arabinogalactan protein 15		-1.14761	-1.26956	100.52	104.379	105.155	48.8601	44.0848	47.697	40.2005	42.2784	45.9263	1.87558e-41	3.86293e-49	100.52	104.379	105.155	48.8601	44.0848	47.697	40.2005	42.2784	45.9263		103.351	46.8807	42.8017
Glyma.13G152168		IQ calmodulin-binding motif family protein		-1.14718	-1.19455	3.43414	2.77258	2.92193	1.13228	1.42496	1.5785	1.44531	1.13539	1.39912	3.11641e-07	2.23964e-08	3.43414	2.77258	2.92193	1.13228	1.42496	1.5785	1.44531	1.13539	1.39912		3.04288	1.37858	1.32661
Glyma.18G271900		COBRA-like extracellular glycosyl-phosphatidyl inositol-anchored protein family		-1.14506	-1.45515	0.539066	0.858242	0.908529	0.298967	0.442515	0.302975	0.344678	0.319634	0.171494	0.0311967	0.00793569	0.539066	0.858242	0.908529	0.298967	0.442515	0.302975	0.344678	0.319634	0.171494		0.768612	0.348152	0.278602
Glyma.12G218900		Dynein light chain type 1 family protein		-1.14474	-1.86075	1.57737	2.98643	3.19187	1.11517	1.26658	1.14946	0.983298	0.559126	0.579481	0.00786323	3.0444e-05	1.57737	2.98643	3.19187	1.11517	1.26658	1.14946	0.983298	0.559126	0.579481		2.58522	1.17707	0.707302
Glyma.10G028300		cupin family protein		-1.14411	-1.02856	2.93771	2.95816	3.27648	1.43604	1.43495	0.968639	1.43721	1.39008	1.31087	2.46429e-08	1.33042e-07	2.93771	2.95816	3.27648	1.43604	1.43495	0.968639	1.43721	1.39008	1.31087		3.05745	1.27988	1.37939
Glyma.14G082200		Protein phosphatase 2C family protein		-1.13646	-1.14502	11.0979	11.0031	14.2016	5.91882	5.41956	5.26728	5.84707	4.98192	5.55205	3.40712e-20	5.98195e-20	11.0979	11.0031	14.2016	5.91882	5.41956	5.26728	5.84707	4.98192	5.55205		12.1009	5.53522	5.46035
Glyma.14G077400		thaumatin-like protein 3		-1.13486	-1.00876	3.31863	4.16674	2.23416	1.82586	0.956773	1.65582	1.41239	1.02035	2.39009	0.00240314	0.0146694	3.31863	4.16674	2.23416	1.82586	0.956773	1.65582	1.41239	1.02035	2.39009		3.23984	1.47949	1.60761
Glyma.08G069300		0		-1.13332	-1.21556	83.1041	92.6501	86.1824	39.3753	39.731	40.851	37.5515	37.2948	37.7301	1.68034e-44	5.7846e-54	83.1041	92.6501	86.1824	39.3753	39.731	40.851	37.5515	37.2948	37.7301		87.3122	39.9858	37.5255
Glyma.11G032200	protease	Eukaryotic aspartyl protease family protein		-1.13223	-1.02485	14.64	15.2048	15.0899	5.80836	7.75055	7.01655	7.35069	8.22561	6.44439	6.10814e-21	4.28806e-20	14.64	15.2048	15.0899	5.80836	7.75055	7.01655	7.35069	8.22561	6.44439		14.9782	6.85849	7.34023
Glyma.20G145800		with no lysine (K) kinase 1		-1.13165	-1.19907	57.1066	53.5365	62.1135	29.1189	25.1478	25.0276	25.2631	24.8932	24.9411	2.09833e-43	4.31062e-64	57.1066	53.5365	62.1135	29.1189	25.1478	25.0276	25.2631	24.8932	24.9411		57.5856	26.4315	25.0325
Glyma.09G212000		Domain of unknown function (DUF1995)		-1.13134	-1.39504	0.816405	0.785976	1.16681	0.750187	0.390668	0.36406	0.801033	0.362307	0.252081	0.0062262	0.00116658	0.816405	0.785976	1.16681	0.750187	0.390668	0.36406	0.801033	0.362307	0.252081		0.923062	0.501638	0.471807
Glyma.18G041300		0		-1.1301	-1.26762	1.20236	1.47849	1.49895	0.637314	0.512965	0.760562	0.42164	0.728587	0.576758	0.00137174	0.000604249	1.20236	1.47849	1.49895	0.637314	0.512965	0.760562	0.42164	0.728587	0.576758		1.39327	0.636947	0.575662
Glyma.16G171400		disease resistance family protein / LRR family protein		-1.12472	-1.06096	2.82248	2.72238	3.09749	1.32441	1.04881	1.56812	1.34387	1.31865	1.38704	1.20171e-09	4.1105e-13	2.82248	2.72238	3.09749	1.32441	1.04881	1.56812	1.34387	1.31865	1.38704		2.88078	1.31378	1.34985
Glyma.15G057200		0		-1.1228	-1.32298	27.2831	29.4058	23.9795	14.3321	11.5251	11.3868	10.6913	10.8274	10.6636	1.82377e-14	4.49878e-23	27.2831	29.4058	23.9795	14.3321	11.5251	11.3868	10.6913	10.8274	10.6636		26.8895	12.4147	10.7275
Glyma.09G111200		actin 1		-1.11941	-1.23338	14.9522	15.2665	14.1843	7.29335	6.90437	6.55023	5.86854	6.58642	6.39043	1.17243e-26	2.41082e-29	14.9522	15.2665	14.1843	7.29335	6.90437	6.55023	5.86854	6.58642	6.39043		14.801	6.91598	6.2818
Glyma.04G021000		DC1 domain-containing protein		-1.11924	-1.13291	25.8383	27.4908	30.7648	12.816	12.9904	13.0597	12.9539	12.6088	12.6854	5.4156e-35	4.77034e-37	25.8383	27.4908	30.7648	12.816	12.9904	13.0597	12.9539	12.6088	12.6854		28.0313	12.9554	12.7494
Glyma.18G064100		calmodulin-binding receptor-like cytoplasmic kinase 1		-1.11796	-1.08614	6.11531	5.34332	8.16547	3.32571	2.79244	2.97499	3.79507	2.97175	2.43997	1.50657e-09	2.97639e-07	6.11531	5.34332	8.16547	3.32571	2.79244	2.97499	3.79507	2.97175	2.43997		6.54136	3.03105	3.06893
Glyma.10G066100		heat shock transcription factor A3		-1.10969	-1.12129	2.64941	2.2793	2.54717	0.970773	1.33227	1.16788	0.975017	1.08428	1.37473	1.27163e-06	1.17173e-06	2.64941	2.2793	2.54717	0.970773	1.33227	1.16788	0.975017	1.08428	1.37473		2.49196	1.15697	1.14468
Glyma.11G044800	XET	xyloglucan endotransglucosylase/hydrolase 6		-1.10852	-1.35594	12.518	13.8725	14.2431	7.07604	6.26908	5.60784	4.88829	5.06913	5.89888	2.31144e-18	7.95156e-28	12.518	13.8725	14.2431	7.07604	6.26908	5.60784	4.88829	5.06913	5.89888		13.5446	6.31765	5.28543
Glyma.14G077333		thaumatin-like protein 3		-1.1075	-1.32074	13.2663	13.8165	10.558	7.94579	5.52426	4.14153	5.58616	5.46648	3.96143	7.94129e-07	4.39123e-13	13.2663	13.8165	10.558	7.94579	5.52426	4.14153	5.58616	5.46648	3.96143		12.5469	5.87053	5.00469
Glyma.04G056067		P-type ATPase of Arabidopsis 2		-1.1075	-1.1906	1.5629	1.64437	1.97151	0.856154	0.653678	0.903294	0.556533	0.803718	0.896929	0.000431855	0.000322218	1.5629	1.64437	1.97151	0.856154	0.653678	0.903294	0.556533	0.803718	0.896929		1.72626	0.804375	0.752393
Glyma.17G259700		GDSL-like Lipase/Acylhydrolase superfamily protein		-1.10704	-1.11711	3.73164	3.8965	3.893	1.94301	2.07432	1.35705	2.05857	1.28782	1.95698	4.67973e-08	1.36115e-07	3.73164	3.8965	3.893	1.94301	2.07432	1.35705	2.05857	1.28782	1.95698		3.84038	1.79146	1.76779
Glyma.12G213100		PDI-like 5-4		-1.10621	-1.12853	1.56487	1.51959	0.945861	0.699687	0.494224	0.519961	0.612152	0.56725	0.545427	0.0013902	0.000896114	1.56487	1.51959	0.945861	0.699687	0.494224	0.519961	0.612152	0.56725	0.545427		1.34344	0.571291	0.574943
Glyma.09G245400		cyclin p4;1		-1.10591	-1.58957	9.64415	10.0581	8.01158	3.67448	4.85342	4.37971	3.08477	3.23102	2.86407	3.47362e-09	1.69167e-19	9.64415	10.0581	8.01158	3.67448	4.85342	4.37971	3.08477	3.23102	2.86407		9.23794	4.30253	3.05995
Glyma.06G039100		BRI1 kinase inhibitor 1		-1.10469	-1.1232	11.6397	11.2542	10.0167	5.77182	4.68355	4.92959	4.44569	5.23763	5.39302	1.28638e-14	3.39528e-15	11.6397	11.2542	10.0167	5.77182	4.68355	4.92959	4.44569	5.23763	5.39302		10.9702	5.12832	5.02545
Glyma.17G232285		basic helix-loop-helix (bHLH) DNA-binding superfamily protein		-1.10234	-1.03534	17.6209	17.6962	17.3217	10.0884	8.79624	8.41188	10.0057	8.6587	9.42944	2.98217e-35	5.53752e-27	17.6209	17.6962	17.3217	10.0884	8.79624	8.41188	10.0057	8.6587	9.42944		17.5463	9.09883	9.3646
Glyma.11G218300		0		-1.09952	-1.08811	14.2335	11.8547	10.7947	6.96034	4.3013	5.9863	8.04707	4.82315	4.40125	8.9487e-05	0.0006004	14.2335	11.8547	10.7947	6.96034	4.3013	5.9863	8.04707	4.82315	4.40125		12.2943	5.74931	5.75716
Glyma.08G117500	CLS	cellulose synthase family protein		-1.09912	-1.21426	7.35115	7.22081	5.73013	3.24679	3.36568	2.72251	2.91737	2.98951	2.60377	2.92102e-16	1.07881e-21	7.35115	7.22081	5.73013	3.24679	3.36568	2.72251	2.91737	2.98951	2.60377		6.76736	3.11166	2.83688
Glyma.09G053400		Ankyrin repeat family protein		-1.09804	-1.08371	2.67131	2.40076	3.03141	1.4102	1.18286	1.21135	1.48599	1.31455	1.00928	9.08634e-09	5.98863e-07	2.67131	2.40076	3.03141	1.4102	1.18286	1.21135	1.48599	1.31455	1.00928		2.70116	1.26814	1.26994
Glyma.13G343000		beta glucosidase 32		-1.09732	-1.19928	23.3656	28.3092	19.4692	12.7978	10.0157	10.6291	9.73598	10.3988	10.7961	2.20372e-15	7.31533e-22	23.3656	28.3092	19.4692	12.7978	10.0157	10.6291	9.73598	10.3988	10.7961		23.7147	11.1476	10.3103
Glyma.18G137500	XET	xyloglucan:xyloglucosyl transferase 33		-1.08901	-1.36444	2.10027	2.26239	2.72978	1.25426	0.908585	1.18797	1.03258	1.0248	0.68555	1.1612e-07	6.40739e-10	2.10027	2.26239	2.72978	1.25426	0.908585	1.18797	1.03258	1.0248	0.68555		2.36414	1.11694	0.914311
Glyma.03G074900		O-fucosyltransferase family protein		-1.08803	-1.28091	0.737197	0.616674	0.649632	0.231795	0.432063	0.275065	0.260413	0.215964	0.343633	0.0101116	0.000946307	0.737197	0.616674	0.649632	0.231795	0.432063	0.275065	0.260413	0.215964	0.343633		0.667834	0.312974	0.273337
Glyma.06G218000		Thioredoxin superfamily protein		-1.0875	-1.09458	3.77238	4.64626	5.81879	2.36931	2.64959	1.69532	2.33299	2.29257	2.03208	5.48347e-06	1.74717e-07	3.77238	4.64626	5.81879	2.36931	2.64959	1.69532	2.33299	2.29257	2.03208		4.74581	2.23808	2.21921
Glyma.04G104100		Protein of unknown function (DUF833)		-1.08337	-1.08664	23.7005	24.4561	24.5841	13.6186	10.9105	10.0114	10.1488	12.083	11.9632	5.52133e-19	3.48466e-25	23.7005	24.4561	24.5841	13.6186	10.9105	10.0114	10.1488	12.083	11.9632		24.2469	11.5135	11.3983
Glyma.09G233800		Integrase-type DNA-binding superfamily protein		-1.08125	-1.1734	13.4699	13.53	14.4592	6.06853	6.16529	7.4414	5.50521	5.54055	7.31842	5.13925e-12	9.54905e-13	13.4699	13.53	14.4592	6.06853	6.16529	7.4414	5.50521	5.54055	7.31842		13.8197	6.55841	6.1214
Glyma.06G137200		O-methyltransferase 1		-1.08073	-1.08233	6.86029	6.58278	5.8008	3.22356	3.76869	2.14994	2.80774	3.1661	3.08868	1.06049e-06	6.79707e-11	6.86029	6.58278	5.8008	3.22356	3.76869	2.14994	2.80774	3.1661	3.08868		6.41462	3.04739	3.02084
Glyma.13G100000		OSBP(oxysterol binding protein)-related protein 4B		-1.07903	-1.1678	3.27025	4.12641	3.40733	1.58998	1.9889	1.54927	1.5696	1.80495	1.41764	3.27521e-06	4.04683e-07	3.27025	4.12641	3.40733	1.58998	1.9889	1.54927	1.5696	1.80495	1.41764		3.60133	1.70938	1.59739
Glyma.17G237100	GASA27	Gibberellin-regulated family protein		-1.07492	-1.11992	306.415	308.715	350.142	153.259	149.493	157.719	144.222	146.39	152.802	2.3549e-49	1.8482e-59	306.415	308.715	350.142	153.259	149.493	157.719	144.222	146.39	152.802		321.757	153.49	147.805
Glyma.18G120400		Fatty acid/sphingolipid desaturase		-1.0731	-1.03209	12.4979	11.9973	11.8333	6.0307	6.04393	5.28164	6.12379	5.52104	6.08295	9.6284e-26	3.94985e-25	12.4979	11.9973	11.8333	6.0307	6.04393	5.28164	6.12379	5.52104	6.08295		12.1095	5.78542	5.90926
Glyma.09G099200		S-locus lectin protein kinase family protein		-1.07288	-1.46746	0.752075	0.689748	0.70343	0.331312	0.273573	0.406001	0.202445	0.302177	0.22897	0.00903893	0.000129304	0.752075	0.689748	0.70343	0.331312	0.273573	0.406001	0.202445	0.302177	0.22897		0.715084	0.336962	0.244531
Glyma.20G017900		Polyketide cyclase/dehydrase and lipid transport superfamily protein		-1.07062	-1.17046	184.4	192.278	186.928	104.79	85.6559	79.5444	81.0516	82.4982	86.4278	6.47406e-32	2.42656e-83	184.4	192.278	186.928	104.79	85.6559	79.5444	81.0516	82.4982	86.4278		187.869	89.9969	83.3258
Glyma.19G003100		beta-1,4-N-acetylglucosaminyltransferase family protein		-1.06995	-1.52129	0.592516	0.993554	0.794394	0.320367	0.357194	0.34383	0.222569	0.328074	0.150228	0.0156794	0.0002428	0.592516	0.993554	0.794394	0.320367	0.357194	0.34383	0.222569	0.328074	0.150228		0.793488	0.340464	0.233624
Glyma.05G144902		Restriction endonuclease, type II-like superfamily protein		-1.06561	-1.15664	5.52088	5.38957	6.66666	2.70137	3.09983	2.63106	3.06294	2.23159	2.56869	2.08257e-11	2.15774e-11	5.52088	5.38957	6.66666	2.70137	3.09983	2.63106	3.06294	2.23159	2.56869		5.85903	2.81076	2.62108
Glyma.06G291700		O-acyltransferase (WSD1-like) family protein		-1.06431	-1.08059	33.037	35.389	34.458	15.2238	16.8102	17.3712	16.9227	15.0195	16.6138	2.92362e-34	6.90154e-40	33.037	35.389	34.458	15.2238	16.8102	17.3712	16.9227	15.0195	16.6138		34.2947	16.4684	16.1853
Glyma.07G270900		Polyketide cyclase/dehydrase and lipid transport superfamily protein		-1.06108	-1.10771	3.1421	2.5473	2.84145	1.55163	1.4532	1.01909	1.136	1.35647	1.3767	8.75419e-05	1.65713e-06	3.1421	2.5473	2.84145	1.55163	1.4532	1.01909	1.136	1.35647	1.3767		2.84361	1.34131	1.28972
Glyma.01G196800	XET	xyloglucan endotransglucosylase/hydrolase 6		-1.05912	-1.13633	20.784	20.1419	22.4123	9.85174	11.0758	9.61866	9.61721	9.54245	9.59861	8.35841e-26	3.63159e-35	20.784	20.1419	22.4123	9.85174	11.0758	9.61866	9.61721	9.54245	9.59861		21.1127	10.1821	9.58609
Glyma.09G047900		Domain of unknown function (DUF23)		-1.0589	-1.06545	11.3247	11.2019	10.0576	5.61228	5.36426	4.74794	5.14328	4.6532	5.75082	1.51611e-20	1.2462e-19	11.3247	11.2019	10.0576	5.61228	5.36426	4.74794	5.14328	4.6532	5.75082		10.8614	5.24149	5.18243
Glyma.11G149200		IQ-domain 11		-1.05038	-1.12802	9.17476	9.87555	10.1259	5.2771	4.39059	4.49721	4.2458	4.15658	4.9279	2.64128e-18	2.64788e-21	9.17476	9.87555	10.1259	5.2771	4.39059	4.49721	4.2458	4.15658	4.9279		9.7254	4.72163	4.44343
Glyma.07G042600		Plant protein of unknown function (DUF936)		-1.04811	-1.11599	4.19328	4.23779	3.52785	1.90783	1.64602	2.24978	1.86765	1.99574	1.63296	3.43486e-08	4.67447e-10	4.19328	4.23779	3.52785	1.90783	1.64602	2.24978	1.86765	1.99574	1.63296		3.9863	1.93454	1.83212
Glyma.05G159966	CLS	cellulose synthase family protein		-1.04765	-1.15888	1.28551	1.35629	1.009	0.779567	0.333364	0.662517	0.515964	0.401196	0.71493	0.00384589	0.000130339	1.28551	1.35629	1.009	0.779567	0.333364	0.662517	0.515964	0.401196	0.71493		1.21693	0.591816	0.54403
Glyma.10G261000		0		-1.04304	-1.04273	2.04919	2.56989	2.86398	1.20423	1.10545	1.33569	1.52993	1.19468	0.892649	1.66457e-05	0.000254602	2.04919	2.56989	2.86398	1.20423	1.10545	1.33569	1.52993	1.19468	0.892649		2.49436	1.21512	1.20575
Glyma.12G039600		Plant calmodulin-binding protein-related		-1.04181	-1.23094	4.8883	5.04545	4.52515	2.44339	2.25853	2.35189	2.03317	1.95343	2.15823	4.57997e-18	1.14354e-23	4.8883	5.04545	4.52515	2.44339	2.25853	2.35189	2.03317	1.95343	2.15823		4.81963	2.35127	2.04828
Glyma.05G001700		MATE efflux family protein		-1.03925	-1.18121	1.4333	0.944654	1.15417	0.612642	0.770945	0.344485	0.601124	0.363029	0.585221	0.0244223	0.00396285	1.4333	0.944654	1.15417	0.612642	0.770945	0.344485	0.601124	0.363029	0.585221		1.17737	0.576024	0.516458
Glyma.11G236100		gamma-glutamyl transpeptidase 1		-1.03444	-1.14281	13.5054	13.8579	16.064	6.92866	7.76462	6.56824	6.06806	6.53689	7.026	4.39061e-19	3.44627e-25	13.5054	13.8579	16.064	6.92866	7.76462	6.56824	6.06806	6.53689	7.026		14.4758	7.08718	6.54365
Glyma.06G021400		RING/U-box superfamily protein		-1.03435	-1.15771	3.78517	3.89207	4.25203	1.98926	1.73456	2.11611	1.48208	2.29109	1.5498	2.46674e-05	3.71569e-05	3.78517	3.89207	4.25203	1.98926	1.73456	2.11611	1.48208	2.29109	1.5498		3.97642	1.94664	1.77432
Glyma.18G004200		MAC/Perforin domain-containing protein		-1.02774	-1.45381	0.681022	0.807823	1.21495	0.541677	0.423926	0.367003	0.193022	0.46502	0.322325	0.0102699	0.000889498	0.681022	0.807823	1.21495	0.541677	0.423926	0.367003	0.193022	0.46502	0.322325		0.901265	0.444202	0.326789
Glyma.10G179200		EXORDIUM like 5		-1.02396	-1.05485	180.068	186.754	182.758	84.7495	92.8661	93.8641	88.0988	89.4604	86.4519	5.07467e-50	1.24563e-74	180.068	186.754	182.758	84.7495	92.8661	93.8641	88.0988	89.4604	86.4519		183.193	90.4932	88.0037
Glyma.11G129200		beta glucosidase 35		-1.0235	-1.66114	1.64869	1.46721	1.77706	0.829819	0.83775	0.818852	0.470391	0.454595	0.652349	0.000572974	2.40956e-07	1.64869	1.46721	1.77706	0.829819	0.83775	0.818852	0.470391	0.454595	0.652349		1.63098	0.828807	0.525778
Glyma.12G205100		Concanavalin A-like lectin protein kinase family protein		-1.01855	-1.15662	0.887227	1.33186	1.22975	0.49556	0.555928	0.6546	0.527387	0.46742	0.549152	0.00118595	0.000129431	0.887227	1.33186	1.22975	0.49556	0.555928	0.6546	0.527387	0.46742	0.549152		1.14961	0.568696	0.514653
Glyma.15G239600		0		-1.01278	-1.06569	149.214	157.139	128.518	73.7564	69.6911	73.1429	70.0616	70.4455	66.7927	5.40257e-33	7.54989e-38	149.214	157.139	128.518	73.7564	69.6911	73.1429	70.0616	70.4455	66.7927		144.957	72.1968	69.0999
Glyma.15G042900		hercules receptor kinase 1		-1.01273	-1.05546	6.73339	5.81774	6.32369	3.47697	2.68271	3.25312	3.1185	3.07574	2.85668	2.49821e-16	9.32746e-22	6.73339	5.81774	6.32369	3.47697	2.68271	3.25312	3.1185	3.07574	2.85668		6.2916	3.1376	3.01697
Glyma.12G174100	ARF29	auxin response factor 16		-1.01261	-1.07937	14.5764	13.6675	17.5493	7.81246	7.75659	7.23647	7.06959	6.84855	7.71604	2.83662e-20	4.24132e-23	14.5764	13.6675	17.5493	7.81246	7.75659	7.23647	7.06959	6.84855	7.71604		15.2644	7.60184	7.21139
Glyma.14G003800		0		-1.01103	-1.05889	5.78865	5.54132	6.9454	3.67559	3.1206	2.3282	2.19686	2.95339	3.60503	1.74807e-05	9.50224e-06	5.78865	5.54132	6.9454	3.67559	3.1206	2.3282	2.19686	2.95339	3.60503		6.09179	3.04146	2.91843
Glyma.13G257700		0		-1.00747	-1.08717	19.7282	19.9533	15.469	10.4666	9.52107	7.59425	8.53577	7.96877	9.40845	1.81024e-08	2.68443e-11	19.7282	19.9533	15.469	10.4666	9.52107	7.59425	8.53577	7.96877	9.40845		18.3835	9.19399	8.63766
Glyma.11G085900		Transducin/WD40 repeat-like superfamily protein		-1.00226	-1.12726	1.47788	1.28658	1.27244	0.713825	0.559568	0.71182	0.52996	0.796237	0.450676	1.15657e-05	2.2533e-05	1.47788	1.28658	1.27244	0.713825	0.559568	0.71182	0.52996	0.796237	0.450676		1.34563	0.661738	0.592291
Glyma.06G050300		CCCH-type zinc finger family protein		1.00079	1.14209	10.6607	10.2545	9.67079	18.351	21.3798	21.7384	22.8978	23.1673	21.2944	1.6436e-19	1.69404e-32	10.6607	10.2545	9.67079	18.351	21.3798	21.7384	22.8978	23.1673	21.2944		10.1953	20.4898	22.4532
Glyma.19G127950		RAD-like 6		1.00194	1.45046	2.19042	2.41016	1.44824	2.82928	5.6589	3.67081	5.73092	5.29645	5.47947	0.00460017	4.45931e-10	2.19042	2.41016	1.44824	2.82928	5.6589	3.67081	5.73092	5.29645	5.47947		2.01627	4.053	5.50228
Glyma.15G071300		Aluminium induced protein with YGL and LRDR motifs		1.00737	1.02095	67.2352	50.9821	59.8035	117.613	121.677	119.254	118.757	120.742	123.049	6.31434e-24	1.24706e-26	67.2352	50.9821	59.8035	117.613	121.677	119.254	118.757	120.742	123.049		59.3402	119.515	120.849
Glyma.02G148200	protease	Eukaryotic aspartyl protease family protein		1.00822	1.05438	2.53846	2.43208	2.73057	5.16387	5.16257	5.24911	5.65607	5.14675	5.17049	2.60421e-11	1.0399e-11	2.53846	2.43208	2.73057	5.16387	5.16257	5.24911	5.65607	5.14675	5.17049		2.56704	5.19185	5.32444
Glyma.18G046400		cysteine-rich RLK (RECEPTOR-like protein kinase) 3		1.00833	1.0004	0.401126	0.483224	0.654577	0.999932	1.13714	0.991167	0.950482	1.00263	1.17279	0.0052713	0.00704162	0.401126	0.483224	0.654577	0.999932	1.13714	0.991167	0.950482	1.00263	1.17279		0.512976	1.04275	1.04197
Glyma.12G112000	RMA	RING membrane-anchor 1		1.01174	1.02436	61.5116	57.0826	73.357	96.7264	107.048	136.721	139.011	100.876	103.7	4.40238e-24	8.23053e-27	61.5116	57.0826	73.357	96.7264	107.048	136.721	139.011	100.876	103.7		63.9837	113.498	114.529
Glyma.04G195300		SNF1-related protein kinase regulatory subunit gamma 1		1.01319	1.0358	14.3598	13.148	16.2004	29.0564	30.1599	29.4469	30.5745	28.3371	30.56	1.68907e-30	1.00168e-32	14.3598	13.148	16.2004	29.0564	30.1599	29.4469	30.5745	28.3371	30.56		14.5694	29.5544	29.8239
Glyma.13G183200		0		1.01634	1.09681	8.65231	8.24199	8.97522	15.2595	18.346	18.9416	19.0607	18.2596	17.9039	1.11904e-19	6.43481e-35	8.65231	8.24199	8.97522	15.2595	18.346	18.9416	19.0607	18.2596	17.9039		8.62317	17.5157	18.4081
Glyma.12G191500	CLS	cellulose synthase-like B4		1.01955	1.02996	1.4695	1.17779	1.32691	2.62352	2.85223	2.63752	2.79781	2.82512	2.4897	1.81546e-08	3.53518e-08	1.4695	1.17779	1.32691	2.62352	2.85223	2.63752	2.79781	2.82512	2.4897		1.32473	2.70443	2.70421
Glyma.07G191400		0		1.02173	1.40823	2.21531	3.01268	2.80228	6.21161	5.42272	4.81896	6.12228	7.20915	8.03701	0.000394229	2.8232e-08	2.21531	3.01268	2.80228	6.21161	5.42272	4.81896	6.12228	7.20915	8.03701		2.67675	5.48443	7.12281
Glyma.02G024200		Actin cross-linking protein		1.02415	1.00793	4.28642	3.83584	3.86473	8.42206	8.20315	7.89212	7.37205	8.36818	8.33851	1.32702e-18	2.06041e-16	4.28642	3.83584	3.86473	8.42206	8.20315	7.89212	7.37205	8.36818	8.33851		3.99566	8.17244	8.02625
Glyma.17G138500		Glycosyl hydrolases family 32 protein		1.02537	1.06999	22.0856	22.349	20.4197	42.1562	44.5562	45.908	44.7994	46.8855	44.2015	6.19351e-42	1.68699e-52	22.0856	22.349	20.4197	42.1562	44.5562	45.908	44.7994	46.8855	44.2015		21.6181	44.2068	45.2954
Glyma.17G110300		xylogalacturonan deficient 1		1.02891	1.13294	1.6952	2.19912	1.56808	3.98483	3.76031	3.47738	3.93833	4.15385	3.87451	7.43242e-07	1.52902e-08	1.6952	2.19912	1.56808	3.98483	3.76031	3.47738	3.93833	4.15385	3.87451		1.8208	3.74084	3.9889
Glyma.02G059500		PQ-loop repeat family protein / transmembrane family protein		1.02955	1.04471	25.6284	22.7277	28.4678	54.2275	53.2946	47.5375	52.9062	49.2459	53.9145	1.04355e-28	1.40997e-32	25.6284	22.7277	28.4678	54.2275	53.2946	47.5375	52.9062	49.2459	53.9145		25.6079	51.6865	52.0222
Glyma.17G087900		Histidine kinase-, DNA gyrase B-, and HSP90-like ATPase family protein		1.03079	1.09078	2.09773	2.07076	2.6307	4.88901	4.88213	4.37989	3.45083	5.30882	5.38005	1.54613e-08	5.21829e-08	2.09773	2.07076	2.6307	4.88901	4.88213	4.37989	3.45083	5.30882	5.38005		2.2664	4.71701	4.71324
Glyma.13G043900		EXORDIUM like 2		1.03731	1.06042	14.6257	16.3108	16.9687	31.0922	31.6929	35.9797	34.0522	32.0361	33.6415	2.32568e-27	1.74836e-37	14.6257	16.3108	16.9687	31.0922	31.6929	35.9797	34.0522	32.0361	33.6415		15.9684	32.9216	33.2432
Glyma.17G230700		gamma vacuolar processing enzyme		1.04112	1.12556	40.7677	43.203	45.2157	87.9875	85.8485	91.7619	92.8525	91.1648	93.6648	9.77316e-53	2.84596e-72	40.7677	43.203	45.2157	87.9875	85.8485	91.7619	92.8525	91.1648	93.6648		43.0621	88.5327	92.5607
Glyma.17G068800		sequence-specific DNA binding transcription factors		1.04144	1.06927	1.18354	0.933315	1.00513	2.1731	2.46227	1.94464	2.34926	2.2995	2.02312	0.000363602	0.000224146	1.18354	0.933315	1.00513	2.1731	2.46227	1.94464	2.34926	2.2995	2.02312		1.04066	2.19333	2.22396
Glyma.18G004900		0		1.04169	1.01932	9.61384	10.2942	10.88	20.6986	21.0753	20.1567	20.3506	19.2899	21.2833	9.17579e-27	5.59939e-25	9.61384	10.2942	10.88	20.6986	21.0753	20.1567	20.3506	19.2899	21.2833		10.2627	20.6436	20.3079
Glyma.15G041400		Protein of unknown function (DUF1635)		1.04628	1.195	0.210011	0.240219	0.31318	0.414548	0.486194	0.686077	0.629929	0.529608	0.592468	0.0142265	0.000867196	0.210011	0.240219	0.31318	0.414548	0.486194	0.686077	0.629929	0.529608	0.592468		0.25447	0.52894	0.584002
Glyma.17G047700	JAZ	jasmonate-zim-domain protein 1		1.04888	1.09559	3.43438	4.13702	2.24411	6.50016	7.06521	6.84006	6.23903	7.62853	7.07229	1.10506e-05	3.65431e-06	3.43438	4.13702	2.24411	6.50016	7.06521	6.84006	6.23903	7.62853	7.07229		3.27183	6.80181	6.97995
Glyma.05G055000		copper chaperone for SOD1		1.05017	1.06637	12.2951	11.6811	10.6836	24.8473	23.3116	24.2331	22.4564	24.2893	26.0462	3.44487e-26	6.43039e-25	12.2951	11.6811	10.6836	24.8473	23.3116	24.2331	22.4564	24.2893	26.0462		11.5533	24.1307	24.2639
Glyma.11G121800		hemoglobin 1		1.05222	1.031	10.5716	10.5751	10.8992	21.6681	22.9357	21.2939	23.029	20.1065	21.7553	7.40795e-36	8.99469e-30	10.5716	10.5751	10.8992	21.6681	22.9357	21.2939	23.029	20.1065	21.7553		10.6819	21.9659	21.6303
Glyma.17G155500		ATP binding microtubule motor family protein		1.05239	1.02896	0.754579	0.840817	0.793851	2.02449	1.5387	1.53496	1.4092	2.07842	1.47992	0.0014727	0.00413746	0.754579	0.840817	0.793851	2.02449	1.5387	1.53496	1.4092	2.07842	1.47992		0.796416	1.69939	1.65585
Glyma.05G231800		aldehyde dehydrogenase 2C4		1.0538	1.30637	0.866208	0.461686	0.83162	1.36154	1.30152	1.8449	1.47809	1.97385	1.89733	0.00505191	6.48788e-05	0.866208	0.461686	0.83162	1.36154	1.30152	1.8449	1.47809	1.97385	1.89733		0.719838	1.50265	1.78309
Glyma.09G208300	XET	xyloglucan endotransglucosylase/hydrolase 30		1.06055	1.07131	3.44148	3.09659	3.7313	7.04654	7.44817	7.0402	7.31779	8.04663	6.16923	2.67774e-12	3.93454e-10	3.44148	3.09659	3.7313	7.04654	7.44817	7.0402	7.31779	8.04663	6.16923		3.42312	7.1783	7.17788
Glyma.12G099300		MATE efflux family protein		1.06113	1.22024	3.82817	4.1331	4.65214	8.65715	8.08786	9.70502	9.83868	9.45053	10.0635	1.08922e-15	1.64518e-25	3.82817	4.1331	4.65214	8.65715	8.08786	9.70502	9.83868	9.45053	10.0635		4.20447	8.81668	9.78425
Glyma.13G056100		HXXXD-type acyl-transferase family protein		1.06902	1.07024	2.04409	2.06746	2.65154	4.49901	4.68195	5.08015	4.46038	5.17142	4.54507	1.69793e-09	2.4556e-09	2.04409	2.06746	2.65154	4.49901	4.68195	5.08015	4.46038	5.17142	4.54507		2.25436	4.7537	4.72562
Glyma.08G351932	2ODD	2-oxoglutarate (2OG) and Fe(II)-dependent oxygenase superfamily protein		1.07674	1.18668	10.2943	10.3752	9.25302	18.957	21.8157	22.6022	23.1112	23.8361	21.0009	1.8953e-23	6.87283e-34	10.2943	10.3752	9.25302	18.957	21.8157	22.6022	23.1112	23.8361	21.0009		9.97416	21.125	22.6494
Glyma.20G036100		ribonuclease 1		1.08353	1.14225	2.11112	2.61067	2.70626	5.173	5.38731	5.28386	5.006	5.67577	5.72005	6.45556e-07	1.89411e-07	2.11112	2.61067	2.70626	5.173	5.38731	5.28386	5.006	5.67577	5.72005		2.47602	5.28139	5.46727
Glyma.08G179600		Peroxidase superfamily protein		1.08537	1.11367	8.09065	8.20349	8.17763	18.4261	17.2244	16.583	17.2325	16.7508	18.9193	4.39846e-28	1.53733e-28	8.09065	8.20349	8.17763	18.4261	17.2244	16.583	17.2325	16.7508	18.9193		8.15726	17.4112	17.6342
Glyma.01G089000		Nucleic acid-binding, OB-fold-like protein		1.0874	1.17439	2.53414	1.97116	2.43555	4.44588	5.08437	5.37982	5.90855	4.64081	5.20766	0.00221183	0.000784078	2.53414	1.97116	2.43555	4.44588	5.08437	5.37982	5.90855	4.64081	5.20766		2.31362	4.97002	5.25234
Glyma.17G222500		WRKY DNA-binding protein 40		1.08753	1.02629	0.707613	0.802909	0.918102	1.42566	1.94903	1.81345	1.57422	1.76475	1.60237	0.000269081	0.000424989	0.707613	0.802909	0.918102	1.42566	1.94903	1.81345	1.57422	1.76475	1.60237		0.809541	1.72938	1.64711
Glyma.08G181100		xylem NAC domain 1		1.08832	1.1081	0.737201	0.609763	0.733611	1.35277	1.35945	1.73409	1.71562	1.26636	1.50866	0.00470468	0.00445087	0.737201	0.609763	0.733611	1.35277	1.35945	1.73409	1.71562	1.26636	1.50866		0.693525	1.4821	1.49688
Glyma.20G144800		Haloacid dehalogenase-like hydrolase (HAD) superfamily protein		1.08993	1.06465	42.9266	37.3308	41.9177	88.4331	85.6244	87.2382	87.4185	81.5541	86.0706	3.66115e-47	1.38491e-44	42.9266	37.3308	41.9177	88.4331	85.6244	87.2382	87.4185	81.5541	86.0706		40.725	87.0986	85.0144
Glyma.01G193300		BTB and TAZ domain protein 4		1.09108	1.1469	0.406564	0.69281	0.85729	1.3455	1.45006	1.40238	1.78071	0.999023	1.55522	0.00667851	0.00872991	0.406564	0.69281	0.85729	1.3455	1.45006	1.40238	1.78071	0.999023	1.55522		0.652221	1.39931	1.44498
Glyma.03G202600		plant U-box 22		1.09186	1.09245	2.75495	2.89599	2.92713	5.49204	6.63215	6.2512	5.5799	6.59318	6.10122	2.09826e-12	5.94551e-13	2.75495	2.89599	2.92713	5.49204	6.63215	6.2512	5.5799	6.59318	6.10122		2.85936	6.12513	6.09143
Glyma.06G124000		glycolipid transfer protein 2		1.09244	1.00519	0.71915	0.485113	0.83004	1.41854	1.799	1.15898	1.30023	1.4337	1.36576	0.0145039	0.0236531	0.71915	0.485113	0.83004	1.41854	1.799	1.15898	1.30023	1.4337	1.36576		0.678101	1.45884	1.36656
Glyma.18G085400		SHV3-like 1		1.09378	1.20742	8.43388	8.41078	9.72303	18.3139	18.6515	20.0144	20.9374	20.8435	19.4501	2.55241e-32	1.84384e-42	8.43388	8.41078	9.72303	18.3139	18.6515	20.0144	20.9374	20.8435	19.4501		8.8559	18.9933	20.4103
Glyma.01G208200		tonoplast intrinsic protein 2;3		1.09426	1.19106	4.23101	3.8191	3.3878	9.29964	7.19874	8.06835	8.25877	9.11614	8.69497	4.05916e-11	2.08663e-15	4.23101	3.8191	3.3878	9.29964	7.19874	8.06835	8.25877	9.11614	8.69497		3.81264	8.18891	8.68996
Glyma.08G032800		oxidative stress 3		1.09701	1.26771	1.85321	1.88887	3.12413	4.62947	6.01211	4.14511	4.86119	5.23178	6.45489	3.64862e-05	1.03034e-07	1.85321	1.88887	3.12413	4.62947	6.01211	4.14511	4.86119	5.23178	6.45489		2.28874	4.92889	5.51595
Glyma.12G108900	GH3	Auxin-responsive GH3 family protein		1.09771	1.03458	3.74188	3.28015	4.30898	8.32919	7.93808	8.1264	7.83376	8.3684	6.96407	4.63853e-16	1.9476e-12	3.74188	3.28015	4.30898	8.32919	7.93808	8.1264	7.83376	8.3684	6.96407		3.77701	8.13122	7.72208
Glyma.10G276000		0		1.0989	1.33287	1.56228	1.37888	1.72019	3.10613	3.22346	3.71574	3.26403	4.62536	3.86278	5.74946e-05	6.01828e-07	1.56228	1.37888	1.72019	3.10613	3.22346	3.71574	3.26403	4.62536	3.86278		1.55378	3.34845	3.91739
Glyma.11G103100		pre-mRNA-processing protein 40C		1.10064	1.09838	2.04362	2.24592	1.94458	5.45568	3.97281	4.04144	4.82704	4.08836	4.31376	3.84929e-12	2.10823e-16	2.04362	2.24592	1.94458	5.45568	3.97281	4.04144	4.82704	4.08836	4.31376		2.07804	4.48997	4.40972
Glyma.06G170700		SNF1-related protein kinase regulatory subunit gamma 1		1.10601	1.10295	23.0389	19.1399	23.4672	43.7863	48.4321	48.0519	52.095	44.9327	48.1973	9.61973e-36	7.93248e-35	23.0389	19.1399	23.4672	43.7863	48.4321	48.0519	52.095	44.9327	48.1973		21.882	46.7567	48.4083
Glyma.20G229700		0		1.10702	1.02971	1.1632	1.06141	0.600976	2.35677	1.54761	2.21256	1.57147	2.33121	1.8575	0.00219648	0.00509685	1.1632	1.06141	0.600976	2.35677	1.54761	2.21256	1.57147	2.33121	1.8575		0.941862	2.03898	1.92006
Glyma.03G079150		0		1.10959	1.11329	1.17819	1.04238	2.41306	3.53665	3.32486	3.23025	3.55205	2.60625	3.90167	0.0157584	0.0197658	1.17819	1.04238	2.41306	3.53665	3.32486	3.23025	3.55205	2.60625	3.90167		1.54454	3.36392	3.35332
Glyma.13G234500		Thioredoxin superfamily protein		1.11218	1.149	6.6452	6.42346	5.1285	11.9855	12.8933	14.6516	14.5661	13.9073	11.804	4.05916e-11	7.29581e-12	6.6452	6.42346	5.1285	11.9855	12.8933	14.6516	14.5661	13.9073	11.804		6.06572	13.1768	13.4258
Glyma.07G236000		Plant neutral invertase family protein		1.11443	1.08802	17.1663	16.3925	19.0779	37.9482	38.3156	38.4255	37.5811	37.5968	37.2946	1.8555e-49	3.86293e-49	17.1663	16.3925	19.0779	37.9482	38.3156	38.4255	37.5811	37.5968	37.2946		17.5456	38.2298	37.4908
Glyma.04G091600		Predicted AT-hook DNA-binding family protein		1.11778	1.07403	2.18962	2.31618	2.12132	4.93865	4.88813	4.64014	4.98996	5.20089	3.73214	1.22565e-13	1.09677e-08	2.18962	2.31618	2.12132	4.93865	4.88813	4.64014	4.98996	5.20089	3.73214		2.20904	4.82231	4.641
Glyma.16G204600		Enolase		1.1183	1.08462	3.50857	3.33833	2.63744	6.06238	7.44541	7.1664	6.00808	7.36661	6.70112	2.51952e-11	4.14652e-11	3.50857	3.33833	2.63744	6.06238	7.44541	7.1664	6.00808	7.36661	6.70112		3.16145	6.8914	6.69194
Glyma.08G136100		0		1.11836	1.10548	2.11981	2.3495	1.97864	3.38007	6.97616	3.69971	6.07787	4.05874	3.58373	0.000243384	1.73752e-05	2.11981	2.3495	1.97864	3.38007	6.97616	3.69971	6.07787	4.05874	3.58373		2.14932	4.68531	4.57345
Glyma.05G184500		WRKY DNA-binding protein 51		1.11907	1.11577	1.77022	2.13467	1.91741	3.88272	4.23335	4.57687	4.05569	4.16382	4.37519	3.63834e-06	3.1126e-06	1.77022	2.13467	1.91741	3.88272	4.23335	4.57687	4.05569	4.16382	4.37519		1.94077	4.23098	4.19823
Glyma.03G210500		Thioredoxin superfamily protein		1.11924	1.15716	1.00781	0.739974	0.675719	1.48656	1.75026	2.05054	1.49125	1.93326	1.99441	0.00535639	0.00344078	1.00781	0.739974	0.675719	1.48656	1.75026	2.05054	1.49125	1.93326	1.99441		0.807833	1.76245	1.80631
Glyma.17G140400		Bifunctional inhibitor/lipid-transfer protein/seed storage 2S albumin superfamily protein		1.12033	1.13454	6.06516	5.60682	6.00739	12.571	12.3993	13.6538	13.3017	12.8839	12.5776	9.13789e-16	1.79429e-16	6.06516	5.60682	6.00739	12.571	12.3993	13.6538	13.3017	12.8839	12.5776		5.89312	12.8747	12.9211
Glyma.18G004000		ATP-dependent RNA helicase, putative		1.1221	1.23009	1.38338	1.53198	1.63098	2.94228	3.55553	3.44675	3.41387	3.63167	3.60511	1.1756e-13	8.70262e-20	1.38338	1.53198	1.63098	2.94228	3.55553	3.44675	3.41387	3.63167	3.60511		1.51545	3.31485	3.55022
Glyma.13G285400		scarecrow-like 5		1.1234	1.22218	2.09829	1.97419	2.46977	4.93544	4.6881	4.75424	4.96497	5.15865	5.10144	1.42132e-14	1.11532e-17	2.09829	1.97419	2.46977	4.93544	4.6881	4.75424	4.96497	5.15865	5.10144		2.18075	4.79259	5.07502
Glyma.06G248900		NAC (No Apical Meristem) domain transcriptional regulator superfamily protein		1.12352	1.27322	1.34402	1.91601	1.43056	3.34513	3.39444	3.5361	2.96692	3.74296	4.63353	2.84846e-07	1.07427e-07	1.34402	1.91601	1.43056	3.34513	3.39444	3.5361	2.96692	3.74296	4.63353		1.56353	3.42522	3.78113
Glyma.08G150800		urophorphyrin methylase 1		1.12552	1.13537	12.2842	12.4609	11.4886	25.7637	27.4233	26.2447	28.313	25.57	25.541	6.19351e-42	6.53859e-39	12.2842	12.4609	11.4886	25.7637	27.4233	26.2447	28.313	25.57	25.541		12.0779	26.4772	26.4747
Glyma.17G029200		Protein phosphatase 2C family protein		1.12672	1.17837	2.38316	2.00999	2.18564	4.25267	5.23174	4.94418	5.0441	4.46703	5.36091	1.04409e-11	8.19895e-14	2.38316	2.00999	2.18564	4.25267	5.23174	4.94418	5.0441	4.46703	5.36091		2.19293	4.80953	4.95735
Glyma.06G158800	protease	Eukaryotic aspartyl protease family protein		1.12729	1.42548	1.64935	1.33066	1.35	3.15122	3.68073	2.69112	3.49869	4.55686	3.56379	2.87812e-07	1.81166e-12	1.64935	1.33066	1.35	3.15122	3.68073	2.69112	3.49869	4.55686	3.56379		1.44334	3.17436	3.87311
Glyma.15G209200		polygalacturonase inhibiting protein 1		1.13155	1.17011	14.8101	13.4528	14.3473	30.9811	32.8341	30.0468	31.9935	32.2617	31.4703	7.05397e-34	5.22002e-39	14.8101	13.4528	14.3473	30.9811	32.8341	30.0468	31.9935	32.2617	31.4703		14.2034	31.2873	31.9085
Glyma.08G313300		polymerase gamma 2		1.13246	1.22411	4.20308	4.51781	4.90779	10.3903	10.1868	9.47159	10.4761	10.2721	11.0461	6.24821e-15	8.04929e-18	4.20308	4.51781	4.90779	10.3903	10.1868	9.47159	10.4761	10.2721	11.0461		4.54289	10.0162	10.5981
Glyma.08G220000		Chaperone DnaJ-domain superfamily protein		1.13749	1.15151	43.4221	44.1487	49.1198	97.6854	104.67	99.8443	98.5926	101.214	103.36	8.93007e-55	1.7278e-65	43.4221	44.1487	49.1198	97.6854	104.67	99.8443	98.5926	101.214	103.36		45.5635	100.733	101.056
Glyma.02G053900		S-adenosyl-L-methionine-dependent methyltransferases superfamily protein		1.13988	1.08388	3.51733	3.6949	4.03755	7.71145	7.99987	9.04168	7.62761	7.91622	8.10639	1.21568e-15	1.09306e-15	3.51733	3.6949	4.03755	7.71145	7.99987	9.04168	7.62761	7.91622	8.10639		3.74993	8.251	7.8834
Glyma.07G168900		tolB protein-related		1.14204	1.2116	9.8222	10.246	9.24498	19.5318	22.2286	22.849	23.1075	22.2363	22.5024	2.98217e-35	1.13965e-58	9.8222	10.246	9.24498	19.5318	22.2286	22.849	23.1075	22.2363	22.5024		9.77105	21.5365	22.6154
Glyma.05G043900		BTB and TAZ domain protein 2		1.14318	1.06458	20.7084	21.7929	24.0611	47.677	47.7741	52.3065	50.3899	43.1161	45.4916	4.04179e-29	1.83953e-23	20.7084	21.7929	24.0611	47.677	47.7741	52.3065	50.3899	43.1161	45.4916		22.1875	49.2526	46.3325
Glyma.14G092800		gamma vacuolar processing enzyme		1.14544	1.19919	33.8668	31.3763	37.9385	77.3887	72.6721	79.2638	72.6791	82.6157	80.054	4.76446e-49	8.0136e-54	33.8668	31.3763	37.9385	77.3887	72.6721	79.2638	72.6791	82.6157	80.054		34.3939	76.4415	78.4496
Glyma.05G211502		monodehydroascorbate reductase 6		1.14639	1.00072	0.654566	0.39617	0.794901	1.46874	1.61593	1.02536	1.18556	1.02883	1.48607	0.0014183	0.00734061	0.654566	0.39617	0.794901	1.46874	1.61593	1.02536	1.18556	1.02883	1.48607		0.615212	1.37001	1.23349
Glyma.20G186500		myb-like transcription factor family protein		1.14902	1.18084	1.62152	1.6908	1.64231	3.65599	3.53893	3.85276	3.94106	3.32187	3.96499	8.63943e-09	1.30827e-08	1.62152	1.6908	1.64231	3.65599	3.53893	3.85276	3.94106	3.32187	3.96499		1.65154	3.68256	3.74264
Glyma.11G208700		oxidative stress 3		1.15097	1.13914	33.3811	36.2382	40.6123	82.5974	83.2657	80.2106	78.8678	79.372	84.1984	1.66221e-41	4.24994e-42	33.3811	36.2382	40.6123	82.5974	83.2657	80.2106	78.8678	79.372	84.1984		36.7439	82.0246	80.8127
Glyma.04G050300		CCCH-type zinc finger family protein		1.15342	1.21922	23.8999	22.3583	27.397	53.9901	54.8186	55.8573	55.9299	60.0168	55.2315	4.45754e-35	2.92301e-39	23.8999	22.3583	27.397	53.9901	54.8186	55.8573	55.9299	60.0168	55.2315		24.5517	54.8886	57.0594
Glyma.20G227300		Plant protein of unknown function (DUF946)		1.15552	1.08505	4.45774	4.72229	4.56254	10.3889	9.32377	11.0533	9.81677	9.74791	9.5329	1.23244e-26	4.32572e-28	4.45774	4.72229	4.56254	10.3889	9.32377	11.0533	9.81677	9.74791	9.5329		4.58086	10.2553	9.6992
Glyma.07G266400		ARM repeat superfamily protein		1.16371	1.03433	3.72645	3.68231	3.58977	7.94913	8.30491	8.5055	7.07851	6.95465	8.47349	4.81335e-34	3.49258e-21	3.72645	3.68231	3.58977	7.94913	8.30491	8.5055	7.07851	6.95465	8.47349		3.66618	8.25318	7.50222
Glyma.18G213200		WRKY DNA-binding protein 70		1.16985	1.20461	6.46397	6.72612	6.34189	14.0961	14.9135	15.1613	15.4921	14.48	14.9718	2.29402e-23	2.66381e-25	6.46397	6.72612	6.34189	14.0961	14.9135	15.1613	15.4921	14.48	14.9718		6.51066	14.7237	14.9813
Glyma.13G068800		cytochrome P450, family 82, subfamily C, polypeptide 4		1.17292	1.11947	1.72225	1.94113	2.3098	5.77165	3.96178	5.37359	4.94362	4.94214	3.05344	8.97149e-09	7.9249e-07	1.72225	1.94113	2.3098	5.77165	3.96178	5.37359	4.94362	4.94214	3.05344		1.99106	5.03568	4.31307
Glyma.13G361900		pleiotropic drug resistance 12		1.17464	1.13095	8.35632	9.13266	10.756	19.241	19.0156	24.5376	20.7939	19.4079	20.2077	3.38366e-23	7.95287e-35	8.35632	9.13266	10.756	19.241	19.0156	24.5376	20.7939	19.4079	20.2077		9.41498	20.9314	20.1365
Glyma.09G159000		Protein of unknown function, DUF599		1.1749	1.86193	0.577674	0.935193	0.999308	2.53071	1.66174	1.53364	2.77637	2.76239	3.62697	0.0083209	1.0444e-08	0.577674	0.935193	0.999308	2.53071	1.66174	1.53364	2.77637	2.76239	3.62697		0.837392	1.9087	3.05525
Glyma.06G042100		DREB and EAR motif protein 3		1.1752	1.12715	5.39558	6.03743	5.64591	11.6744	14.3472	12.7244	11.9946	13.6036	11.6344	1.31195e-18	3.39852e-18	5.39558	6.03743	5.64591	11.6744	14.3472	12.7244	11.9946	13.6036	11.6344		5.69297	12.9153	12.4108
Glyma.18G022700		senescence associated gene 20		1.17743	1.12388	20.0483	22.7582	18.5918	37.4724	49.8608	52.0289	45.1437	45.795	42.5866	1.04798e-18	3.52759e-30	20.0483	22.7582	18.5918	37.4724	49.8608	52.0289	45.1437	45.795	42.5866		20.4661	46.454	44.5084
Glyma.13G029600		DNA-directed DNA polymerases		1.17858	1.23705	1.09057	1.23556	1.91627	4.04242	2.67497	3.06025	3.44452	2.41894	4.25813	0.0247179	0.0197694	1.09057	1.23556	1.91627	4.04242	2.67497	3.06025	3.44452	2.41894	4.25813		1.41413	3.25921	3.37386
Glyma.11G185700		cytochrome P450, family 94, subfamily C, polypeptide 1		1.18062	1.30279	1.88277	1.91174	1.75679	3.66996	4.18541	4.78613	3.93471	4.92435	4.82645	4.39385e-12	2.68563e-16	1.88277	1.91174	1.75679	3.66996	4.18541	4.78613	3.93471	4.92435	4.82645		1.85043	4.21384	4.56184
Glyma.13G179200		Protein of unknown function (DUF506)		1.18215	1.29299	2.01276	1.98856	3.24033	5.61046	5.95404	4.97414	5.929	5.58542	6.22379	4.25622e-07	4.8655e-09	2.01276	1.98856	3.24033	5.61046	5.95404	4.97414	5.929	5.58542	6.22379		2.41388	5.51288	5.91274
Glyma.07G011700		phosphate starvation-induced gene 2		1.18288	1.21861	1.42065	0.759887	1.51095	3.20236	2.40955	2.83036	3.15681	2.86344	2.56372	0.000132757	4.94698e-05	1.42065	0.759887	1.51095	3.20236	2.40955	2.83036	3.15681	2.86344	2.56372		1.2305	2.81409	2.86132
Glyma.15G179600	JAZ	jasmonate-zim-domain protein 1		1.18338	1.23383	44.9661	47.7403	43.5372	98.2403	104.295	110.216	106.165	106.398	108.258	1.20788e-55	1.70448e-80	44.9661	47.7403	43.5372	98.2403	104.295	110.216	106.165	106.398	108.258		45.4145	104.25	106.94
Glyma.02G215700		matrix metalloproteinase		1.18368	1.26771	8.29743	9.47061	10.5236	19.5612	23.3707	21.6473	23.028	24.7965	20.157	8.54618e-21	9.0384e-24	8.29743	9.47061	10.5236	19.5612	23.3707	21.6473	23.028	24.7965	20.157		9.43056	21.5264	22.6605
Glyma.08G230100		MLP-like protein 43		1.18382	1.12266	1.40802	1.60713	0.945414	3.54238	3.22468	2.3098	2.81564	2.72638	3.07439	0.000906402	0.00100517	1.40802	1.60713	0.945414	3.54238	3.22468	2.3098	2.81564	2.72638	3.07439		1.32019	3.02562	2.87214
Glyma.07G152000		Plant protein of unknown function (DUF828)		1.1854	1.01046	0.669243	0.532882	0.684905	1.0657	1.9366	1.32107	1.54754	0.785321	1.47144	0.00285172	0.025994	0.669243	0.532882	0.684905	1.0657	1.9366	1.32107	1.54754	0.785321	1.47144		0.62901	1.44112	1.2681
Glyma.14G073200		0		1.18678	1.1154	5.5437	7.1076	7.54018	15.5613	16.8006	13.8428	14.7361	13.4167	15.6314	5.07845e-14	6.91919e-13	5.5437	7.1076	7.54018	15.5613	16.8006	13.8428	14.7361	13.4167	15.6314		6.73049	15.4016	14.5947
Glyma.20G000200		uridine-ribohydrolase 2		1.18784	1.03006	2.28699	2.16203	3.11084	5.8388	5.65437	5.59687	5.01465	5.1867	4.90303	2.50722e-09	1.11296e-06	2.28699	2.16203	3.11084	5.8388	5.65437	5.59687	5.01465	5.1867	4.90303		2.51996	5.69668	5.03479
Glyma.17G128000	MAS	malate synthase		1.1882	1.32979	0.813038	0.4941	0.822962	1.4496	1.52321	1.91195	1.75117	1.79853	1.80808	7.01958e-05	7.45154e-07	0.813038	0.4941	0.822962	1.4496	1.52321	1.91195	1.75117	1.79853	1.80808		0.710033	1.62826	1.78592
Glyma.18G189600		Major facilitator superfamily protein		1.18941	1.18099	0.45874	0.594052	0.366599	1.11432	1.16291	0.984839	0.809865	1.36979	1.0418	0.00114251	0.00391883	0.45874	0.594052	0.366599	1.11432	1.16291	0.984839	0.809865	1.36979	1.0418		0.47313	1.08736	1.07382
Glyma.06G149120		0		1.19556	1.07431	4.58793	3.5594	4.04526	8.90728	10.1337	9.05358	9.57827	8.60835	7.44968	1.32203e-11	4.05283e-08	4.58793	3.5594	4.04526	8.90728	10.1337	9.05358	9.57827	8.60835	7.44968		4.0642	9.36486	8.54543
Glyma.12G150500		Aluminium induced protein with YGL and LRDR motifs		1.19882	1.33867	2.4953	3.43856	3.8082	7.80898	7.363	7.31883	7.10512	8.52451	8.9906	3.14269e-16	3.44391e-19	2.4953	3.43856	3.8082	7.80898	7.363	7.31883	7.10512	8.52451	8.9906		3.24735	7.49694	8.20674
Glyma.06G285900		Optic atrophy 3 protein (OPA3)		1.19929	1.24638	0.438599	0.221811	0.421333	1.00897	0.663872	0.906284	0.530718	1.17753	0.900406	0.0286423	0.0382183	0.438599	0.221811	0.421333	1.00897	0.663872	0.906284	0.530718	1.17753	0.900406		0.360581	0.85971	0.869552
Glyma.11G247600	GAPDH	glyceraldehyde-3-phosphate dehydrogenase C subunit 1		1.19941	1.21685	6.42721	6.18753	4.6867	14.6226	13.7771	11.576	12.5618	14.4838	13.1017	2.43899e-15	1.87745e-17	6.42721	6.18753	4.6867	14.6226	13.7771	11.576	12.5618	14.4838	13.1017		5.76715	13.3252	13.3824
Glyma.13G285300		cytochrome P450, family 82, subfamily C, polypeptide 4		1.20092	1.2631	2.90632	2.35159	3.39029	6.59608	6.25307	7.13743	6.47566	7.62155	6.62723	9.74787e-13	4.75206e-14	2.90632	2.35159	3.39029	6.59608	6.25307	7.13743	6.47566	7.62155	6.62723		2.88273	6.66219	6.90815
Glyma.02G236800		cytokinin response factor 4		1.20444	1.1453	2.79499	1.94976	1.86758	5.34448	4.90451	5.07674	5.29661	4.67277	4.62936	5.27507e-11	1.51785e-09	2.79499	1.94976	1.86758	5.34448	4.90451	5.07674	5.29661	4.67277	4.62936		2.20411	5.10858	4.86625
Glyma.05G019200		cytochrome P450, family 78, subfamily A, polypeptide 10		1.20536	1.03631	0.390724	0.386882	0.648485	1.01172	1.19267	1.11256	1.23951	0.756517	0.930934	0.000399894	0.0103056	0.390724	0.386882	0.648485	1.01172	1.19267	1.11256	1.23951	0.756517	0.930934		0.475364	1.10565	0.975653
Glyma.08G000700		0		1.20602	1.21545	0.437788	0.426063	0.447962	1.22155	0.695553	1.14829	0.961367	1.06467	1.03753	0.00440648	0.00122654	0.437788	0.426063	0.447962	1.22155	0.695553	1.14829	0.961367	1.06467	1.03753		0.437271	1.0218	1.02119
Glyma.08G211100		Lactoylglutathione lyase / glyoxalase I family protein		1.21071	1.22567	1.00295	1.29678	1.04108	3.08185	2.15598	2.55351	3.27224	2.15553	2.38129	0.000318464	0.000522223	1.00295	1.29678	1.04108	3.08185	2.15598	2.55351	3.27224	2.15553	2.38129		1.1136	2.59712	2.60302
Glyma.20G137700		cysteine-rich RLK (RECEPTOR-like protein kinase) 29		1.21465	1.93178	0.492879	0.598595	0.264107	0.901366	1.2448	1.02005	2.1299	1.19786	1.85629	0.00320754	2.7461e-08	0.492879	0.598595	0.264107	0.901366	1.2448	1.02005	2.1299	1.19786	1.85629		0.45186	1.05541	1.72802
Glyma.18G026500	2ODD	2-oxoglutarate (2OG) and Fe(II)-dependent oxygenase superfamily protein		1.21465	1.32086	3.49737	4.30966	3.13721	8.16468	8.66131	8.71873	9.34399	9.411	8.54867	8.02413e-16	3.91227e-19	3.49737	4.30966	3.13721	8.16468	8.66131	8.71873	9.34399	9.411	8.54867		3.64808	8.51491	9.10122
Glyma.19G218300		AMP-dependent synthetase and ligase family protein		1.21719	1.2599	3.59288	3.02269	3.24473	7.91885	7.48241	7.69653	7.71879	8.29421	7.42755	6.90842e-23	1.14354e-23	3.59288	3.02269	3.24473	7.91885	7.48241	7.69653	7.71879	8.29421	7.42755		3.28677	7.69926	7.81351
Glyma.16G085600		Protein of unknown function (DUF506)		1.21785	1.04549	3.41217	2.4198	2.75924	5.72607	7.65547	6.6977	5.65841	5.9594	6.09431	1.20171e-09	4.38064e-08	3.41217	2.4198	2.75924	5.72607	7.65547	6.6977	5.65841	5.9594	6.09431		2.86373	6.69308	5.90404
Glyma.11G204766		cysteine-rich RLK (RECEPTOR-like protein kinase) 3		1.22153	1.35948	0.299583	0.409928	0.34584	0.722937	0.916047	0.837023	1.04969	0.716629	0.943435	0.00168691	0.000414321	0.299583	0.409928	0.34584	0.722937	0.916047	0.837023	1.04969	0.716629	0.943435		0.351784	0.825336	0.903252
Glyma.11G049100		0		1.22264	1.17749	1.64131	0.996334	1.59561	3.5048	3.82492	2.63452	2.74619	3.43371	3.41135	0.00331004	0.00473034	1.64131	0.996334	1.59561	3.5048	3.82492	2.63452	2.74619	3.43371	3.41135		1.41108	3.32141	3.19708
Glyma.15G031400		beta glucosidase 17		1.22715	1.13811	33.0924	31.6246	37.2174	79.723	79.1982	80.9312	73.4928	73.3281	77.1506	2.57251e-56	5.23519e-51	33.0924	31.6246	37.2174	79.723	79.1982	80.9312	73.4928	73.3281	77.1506		33.9781	79.9508	74.6572
Glyma.02G010900		WRKY DNA-binding protein 23		1.22954	1.37929	2.8615	2.3041	2.78689	6.24695	5.88858	6.63392	7.07392	7.05505	6.5415	3.73693e-14	1.05373e-18	2.8615	2.3041	2.78689	6.24695	5.88858	6.63392	7.07392	7.05505	6.5415		2.65083	6.25648	6.89016
Glyma.14G200800		O-methyltransferase family protein		1.23176	1.22968	1.36808	2.27294	1.54869	3.71885	4.14677	4.39513	3.8753	4.13474	4.15497	4.83296e-07	2.51113e-07	1.36808	2.27294	1.54869	3.71885	4.14677	4.39513	3.8753	4.13474	4.15497		1.7299	4.08691	4.055
Glyma.09G173300		0		1.23332	1.17233	3.21975	2.36375	4.80482	10.1011	9.78633	4.83534	6.48033	9.22694	7.81722	0.0203422	0.0161484	3.21975	2.36375	4.80482	10.1011	9.78633	4.83534	6.48033	9.22694	7.81722		3.46277	8.24091	7.8415
Glyma.08G292000	ILR	IAA-leucine resistant (ILR)-like 2		1.23429	1.21247	2.00453	2.90223	3.05779	5.59004	6.9208	6.31875	6.11986	6.23036	6.0869	5.02973e-10	1.13434e-10	2.00453	2.90223	3.05779	5.59004	6.9208	6.31875	6.11986	6.23036	6.0869		2.65485	6.27653	6.14571
Glyma.07G199000		squamosa promoter binding protein-like 4		1.23842	1.35387	1.03428	1.13616	1.05268	2.89694	2.70827	2.27634	2.57679	2.74547	2.84302	1.63608e-06	1.63195e-08	1.03428	1.13616	1.05268	2.89694	2.70827	2.27634	2.57679	2.74547	2.84302		1.07437	2.62719	2.72176
Glyma.13G092500		trehalose phosphatase/synthase 11		1.24347	1.261	7.1867	7.87322	9.95881	19.3155	19.2051	21.0079	20.2064	20.2484	19.404	5.79904e-25	5.63903e-28	7.1867	7.87322	9.95881	19.3155	19.2051	21.0079	20.2064	20.2484	19.404		8.33958	19.8428	19.9529
Glyma.05G128500		0		1.25765	1.14164	14.2654	15.7299	12.9441	39.6164	33.2621	30.4133	30.3296	31.714	32.5259	2.55624e-25	7.28973e-28	14.2654	15.7299	12.9441	39.6164	33.2621	30.4133	30.3296	31.714	32.5259		14.3131	34.4306	31.5232
Glyma.09G094000		flavin-dependent monooxygenase 1		1.25976	1.00936	0.484994	0.337018	0.403403	1.11113	0.781523	1.13773	0.703109	0.704058	1.07425	0.00110168	0.0251154	0.484994	0.337018	0.403403	1.11113	0.781523	1.13773	0.703109	0.704058	1.07425		0.408472	1.01013	0.827138
Glyma.05G043800		0		1.26064	1.18859	8.50186	7.48067	10.1179	19.6402	22.4039	20.846	22.8081	19.2923	17.2732	1.74033e-17	4.47783e-13	8.50186	7.48067	10.1179	19.6402	22.4039	20.846	22.8081	19.2923	17.2732		8.70014	20.9634	19.7912
Glyma.04G040000		HXXXD-type acyl-transferase family protein		1.26371	1.31834	0.499689	0.408443	0.444237	0.946251	1.08518	1.23606	1.17486	1.21219	0.987899	3.03322e-06	6.07168e-07	0.499689	0.408443	0.444237	0.946251	1.08518	1.23606	1.17486	1.21219	0.987899		0.45079	1.08916	1.12498
Glyma.02G153000		Glutaredoxin family protein		1.26786	1.33189	10.6677	10.4177	9.8215	29.122	22.2849	23.5194	23.7974	27.1483	26.7872	2.06672e-21	2.43545e-30	10.6677	10.4177	9.8215	29.122	22.2849	23.5194	23.7974	27.1483	26.7872		10.3023	24.9754	25.911
Glyma.11G116600		Glucose-1-phosphate adenylyltransferase family protein		1.27386	1.28352	8.10744	7.162	6.62016	15.9777	17.8674	19.1518	20.0974	16.5652	16.4861	6.48287e-30	9.30828e-29	8.10744	7.162	6.62016	15.9777	17.8674	19.1518	20.0974	16.5652	16.4861		7.29654	17.6656	17.7162
Glyma.18G130100		Domain of unknown function (DUF23)		1.27456	1.1212	1.21542	1.08202	1.03759	2.59757	2.30981	3.19877	2.63617	2.317	2.28813	1.22576e-08	3.10474e-07	1.21542	1.08202	1.03759	2.59757	2.30981	3.19877	2.63617	2.317	2.28813		1.11168	2.70205	2.41377
Glyma.18G216800		Leucine-rich repeat protein kinase family protein		1.27627	1.19822	0.977201	1.01199	1.28433	2.84813	2.47983	2.68937	2.40913	2.69471	2.43271	1.45215e-13	1.08313e-11	0.977201	1.01199	1.28433	2.84813	2.47983	2.68937	2.40913	2.69471	2.43271		1.09117	2.67244	2.51219
Glyma.11G197500	LOX	PLAT/LH2 domain-containing lipoxygenase family protein		1.27762	1.29775	0.556604	0.66102	0.765761	1.41644	1.56949	1.84107	1.6202	1.19737	2.05976	3.94239e-06	2.41441e-05	0.556604	0.66102	0.765761	1.41644	1.56949	1.84107	1.6202	1.19737	2.05976		0.661128	1.609	1.62578
Glyma.06G078100		protein kinase C-like zinc finger protein		1.28205	1.16313	9.65324	9.67791	6.65908	23.2978	21.7905	19.2976	20.7469	14.491	23.354	7.45057e-20	4.10902e-12	9.65324	9.67791	6.65908	23.2978	21.7905	19.2976	20.7469	14.491	23.354		8.66341	21.462	19.5306
Glyma.16G131200		ferulic acid 5-hydroxylase 1		1.28332	1.30122	2.46761	2.46453	1.84114	6.39222	5.41619	4.77987	4.77032	5.10725	6.80756	9.91147e-13	5.64353e-12	2.46761	2.46453	1.84114	6.39222	5.41619	4.77987	4.77032	5.10725	6.80756		2.25776	5.52943	5.56171
Glyma.15G274200		Polyketide cyclase/dehydrase and lipid transport superfamily protein		1.28359	1.48178	0.686614	0.664898	1.00272	2.36565	2.01809	1.4187	2.37623	2.16969	2.03619	0.0060593	0.000263335	0.686614	0.664898	1.00272	2.36565	2.01809	1.4187	2.37623	2.16969	2.03619		0.784742	1.93415	2.19404
Glyma.18G268200		HXXXD-type acyl-transferase family protein		1.29642	1.02577	0.519869	0.576599	0.481784	1.05321	1.2524	1.60046	1.09477	0.97139	1.15559	0.000200559	0.00581036	0.519869	0.576599	0.481784	1.05321	1.2524	1.60046	1.09477	0.97139	1.15559		0.526084	1.30202	1.07392
Glyma.06G050100		branched-chain amino acid transaminase 2		1.2983	1.43169	8.2993	8.41708	7.97585	20.6211	19.8634	20.3742	20.6085	22.6875	23.1231	3.34155e-42	1.42752e-47	8.2993	8.41708	7.97585	20.6211	19.8634	20.3742	20.6085	22.6875	23.1231		8.23074	20.2862	22.1397
Glyma.12G042400		Glucose-1-phosphate adenylyltransferase family protein		1.30089	1.33493	3.30126	3.49729	3.89657	8.5164	8.94331	9.33645	9.90054	9.01069	8.46708	1.25103e-28	1.4689e-27	3.30126	3.49729	3.89657	8.5164	8.94331	9.33645	9.90054	9.01069	8.46708		3.56504	8.93205	9.1261
Glyma.01G105600		0		1.30464	1.11731	0.577521	0.582154	1.02026	1.85497	1.67729	1.85444	1.47168	1.48633	1.7504	0.000403578	0.00603872	0.577521	0.582154	1.02026	1.85497	1.67729	1.85444	1.47168	1.48633	1.7504		0.726645	1.79557	1.56947
Glyma.15G105300		TRICHOME BIREFRINGENCE-LIKE 11		1.30662	1.42645	0.706505	0.499021	1.01452	1.70715	2.04831	1.83506	2.00518	2.05813	1.97807	1.48504e-05	4.98029e-07	0.706505	0.499021	1.01452	1.70715	2.04831	1.83506	2.00518	2.05813	1.97807		0.740014	1.86351	2.01379
Glyma.02G130400		Chalcone and stilbene synthase family protein		1.3151	1.76225	0.573596	0.630414	1.05729	2.21452	1.55855	1.90795	2.58941	2.79308	2.29444	0.000298652	8.50653e-09	0.573596	0.630414	1.05729	2.21452	1.55855	1.90795	2.58941	2.79308	2.29444		0.753767	1.89367	2.55898
Glyma.05G186700		Integrase-type DNA-binding superfamily protein		1.31593	1.31441	4.66531	3.77913	3.89727	9.34813	9.4946	12.0216	9.42087	9.96891	11.2862	6.53273e-19	1.10993e-23	4.66531	3.77913	3.89727	9.34813	9.4946	12.0216	9.42087	9.96891	11.2862		4.1139	10.2881	10.2253
Glyma.03G222000		galactinol synthase 1		1.32153	1.14877	1.58651	1.23748	1.22648	3.19362	4.00126	2.98945	3.06814	2.87176	3.04061	1.06285e-08	4.48409e-07	1.58651	1.23748	1.22648	3.19362	4.00126	2.98945	3.06814	2.87176	3.04061		1.35016	3.39478	2.99351
Glyma.07G048100		NAC transcription factor-like 9		1.3287	1.2105	1.66175	1.56332	2.31076	5.80891	4.23091	3.98027	3.06116	4.03367	5.73377	2.1811e-09	2.81658e-06	1.66175	1.56332	2.31076	5.80891	4.23091	3.98027	3.06116	4.03367	5.73377		1.84527	4.67336	4.2762
Glyma.05G222000		galacturonic acid kinase		1.32893	1.33232	9.108	8.38431	10.0334	22.4845	22.5535	24.4416	22.9998	23.6552	22.5296	6.48056e-40	1.2765e-43	9.108	8.38431	10.0334	22.4845	22.5535	24.4416	22.9998	23.6552	22.5296		9.17524	23.1599	23.0615
Glyma.16G181300		NAD(P)-binding Rossmann-fold superfamily protein		1.32955	1.15904	0.547324	0.650268	0.563971	1.20197	1.73933	1.51307	0.887091	1.17785	1.88664	0.000132043	0.00835537	0.547324	0.650268	0.563971	1.20197	1.73933	1.51307	0.887091	1.17785	1.88664		0.587188	1.48479	1.31719
Glyma.16G071500		0		1.33134	1.27626	3.96115	3.82141	3.86657	9.23404	9.19309	10.6723	10.1191	7.80247	9.9004	3.50707e-52	3.05611e-40	3.96115	3.82141	3.86657	9.23404	9.19309	10.6723	10.1191	7.80247	9.9004		3.88304	9.69982	9.27398
Glyma.01G040900		RNA helicase family protein		1.3333	1.31069	0.166175	0.290042	0.441434	0.990309	0.975597	0.724973	0.94046	0.70755	0.694378	1.18293e-05	1.71882e-05	0.166175	0.290042	0.441434	0.990309	0.975597	0.724973	0.94046	0.70755	0.694378		0.299217	0.89696	0.780796
Glyma.06G123200		nodulin MtN21 /EamA-like transporter family protein		1.34025	1.39798	0.335531	0.415784	0.120798	0.821052	0.657193	0.763715	0.635974	0.886453	0.78842	0.0226463	0.0153877	0.335531	0.415784	0.120798	0.821052	0.657193	0.763715	0.635974	0.886453	0.78842		0.290704	0.74732	0.770282
Glyma.10G227400		multidrug resistance-associated protein 14		1.34765	1.3861	0.380965	0.361449	0.3625	0.803442	1.01727	1.02192	1.05427	0.903386	1.01026	5.69419e-10	7.82624e-11	0.380965	0.361449	0.3625	0.803442	1.01727	1.02192	1.05427	0.903386	1.01026		0.368305	0.947544	0.989304
Glyma.06G193500		glutathione S-transferase tau 9		1.34958	1.05136	2.11953	2.17587	1.96113	6.21051	5.10197	4.75408	3.71852	4.16347	5.0899	3.4465e-14	1.70137e-07	2.11953	2.17587	1.96113	6.21051	5.10197	4.75408	3.71852	4.16347	5.0899		2.08551	5.35552	4.32396
Glyma.13G331000		CCT motif family protein		1.3498	1.30145	0.613175	0.431169	0.311822	1.00476	1.24543	1.22868	1.21937	1.0369	1.09332	0.00533917	0.00880998	0.613175	0.431169	0.311822	1.00476	1.24543	1.22868	1.21937	1.0369	1.09332		0.452055	1.15962	1.11653
Glyma.08G071100		white-brown complex homolog protein 11		1.34999	1.35362	2.69655	2.5449	3.40194	7.33885	7.5483	7.26996	7.21739	7.50321	7.34408	3.78401e-22	1.28785e-22	2.69655	2.5449	3.40194	7.33885	7.5483	7.26996	7.21739	7.50321	7.34408		2.88113	7.3857	7.35489
Glyma.11G106200		Pathogenesis-related thaumatin superfamily protein		1.35045	1.5845	0.21884	0.383788	0.222599	0.702773	0.831326	0.603106	0.598983	0.967235	0.983617	0.0191821	0.00350035	0.21884	0.383788	0.222599	0.702773	0.831326	0.603106	0.598983	0.967235	0.983617		0.275076	0.712402	0.849945
Glyma.04G058400		histidine kinase 5		1.35104	1.21906	0.610739	0.504814	0.323712	0.672073	1.82619	1.18902	1.11807	1.13754	1.09372	0.000697081	2.76517e-05	0.610739	0.504814	0.323712	0.672073	1.82619	1.18902	1.11807	1.13754	1.09372		0.479755	1.22909	1.11644
Glyma.08G348600		UDP-glucosyl transferase 73B1		1.35831	1.33105	0.819889	0.661009	0.453512	2.05595	1.12011	1.83634	1.71572	1.62982	1.52866	0.00190128	0.000783413	0.819889	0.661009	0.453512	2.05595	1.12011	1.83634	1.71572	1.62982	1.52866		0.644803	1.6708	1.62473
Glyma.12G092600		NAD(P)-binding Rossmann-fold superfamily protein		1.36358	1.22175	0.627453	0.82407	0.879883	2.38613	2.13114	1.51271	1.97924	1.87724	1.57114	9.92948e-05	0.0005832	0.627453	0.82407	0.879883	2.38613	2.13114	1.51271	1.97924	1.87724	1.57114		0.777135	2.01	1.80921
Glyma.07G212800		nitrite reductase 1		1.36371	1.37408	13.2734	12.3527	13.6734	32.6269	36.0412	32.9541	37.2971	32.2295	32.121	2.92623e-62	3.74393e-55	13.2734	12.3527	13.6734	32.6269	36.0412	32.9541	37.2971	32.2295	32.121		13.0998	33.8741	33.8825
Glyma.01G171300		P-loop containing nucleoside triphosphate hydrolases superfamily protein		1.36502	1.07682	0.459589	0.318735	0.38345	1.27869	0.970979	0.759492	0.963581	0.554593	0.924625	0.00133077	0.0347518	0.459589	0.318735	0.38345	1.27869	0.970979	0.759492	0.963581	0.554593	0.924625		0.387258	1.00306	0.814266
Glyma.13G043800		white-brown complex homolog protein 11		1.36733	1.29023	4.46136	4.6268	5.20347	11.7182	12.2033	13.1286	10.51	11.9735	12.4323	1.68743e-38	3.67684e-33	4.46136	4.6268	5.20347	11.7182	12.2033	13.1286	10.51	11.9735	12.4323		4.76388	12.35	11.6386
Glyma.19G151300		Disease resistance-responsive (dirigent-like protein) family protein		1.36817	1.17149	2.0662	2.07524	1.77012	3.99232	6.41773	4.93975	4.72934	3.54753	5.05218	5.38988e-08	2.34844e-06	2.0662	2.07524	1.77012	3.99232	6.41773	4.93975	4.72934	3.54753	5.05218		1.97052	5.1166	4.44302
Glyma.11G027400		non-yellowing 1		1.36986	1.35445	4.41034	4.17668	3.76878	10.491	10.4234	11.2029	10.7	10.9455	9.90525	2.63473e-25	8.96695e-24	4.41034	4.17668	3.76878	10.491	10.4234	11.2029	10.7	10.9455	9.90525		4.1186	10.7058	10.5169
Glyma.08G182900		nodulin MtN21 /EamA-like transporter family protein		1.36989	1.26969	1.23037	0.931342	1.43725	4.17097	2.29886	2.91118	3.04994	2.4309	3.19387	1.03552e-06	2.79132e-07	1.23037	0.931342	1.43725	4.17097	2.29886	2.91118	3.04994	2.4309	3.19387		1.19966	3.127	2.89157
Glyma.17G011600		SLAC1 homologue 1		1.3739	1.80496	0.215887	0.249045	0.147884	0.502694	0.464729	0.614185	0.862938	0.615344	0.656741	0.0455311	0.00171943	0.215887	0.249045	0.147884	0.502694	0.464729	0.614185	0.862938	0.615344	0.656741		0.204272	0.527203	0.711674
Glyma.17G036900		serine carboxypeptidase-like 33		1.37941	1.29551	0.751963	0.453327	0.742076	1.88745	1.80974	1.44352	1.56872	1.39149	1.85339	0.000837546	0.00292087	0.751963	0.453327	0.742076	1.88745	1.80974	1.44352	1.56872	1.39149	1.85339		0.649122	1.71357	1.60454
Glyma.13G181000		Aluminium induced protein with YGL and LRDR motifs		1.3825	1.53112	1.55014	0.892415	1.17163	3.23672	3.23074	3.0866	3.55111	3.52045	3.32005	1.18735e-07	1.11079e-09	1.55014	0.892415	1.17163	3.23672	3.23074	3.0866	3.55111	3.52045	3.32005		1.20473	3.18469	3.46387
Glyma.07G043000	DRM/ARP	Dormancy/auxin associated family protein		1.38273	1.12938	2.18453	2.2509	2.79332	6.60436	6.29678	6.04721	5.53308	4.96595	5.19283	3.33361e-12	2.44438e-07	2.18453	2.2509	2.79332	6.60436	6.29678	6.04721	5.53308	4.96595	5.19283		2.40958	6.31611	5.23062
Glyma.09G172500		MAP kinase kinase 9		1.38329	1.35659	5.51841	6.21291	6.4627	13.5714	16.72	17.3583	16.4125	15.1727	14.9131	2.11452e-24	6.34339e-31	5.51841	6.21291	6.4627	13.5714	16.72	17.3583	16.4125	15.1727	14.9131		6.06467	15.8832	15.4994
Glyma.08G077900		Late embryogenesis abundant (LEA) hydroxyproline-rich glycoprotein family		1.38411	1.54759	0.267457	0.435946	0.684716	1.73091	1.44269	1.01863	1.55316	1.92897	1.66137	0.000313598	1.14675e-05	0.267457	0.435946	0.684716	1.73091	1.44269	1.01863	1.55316	1.92897	1.66137		0.462706	1.39741	1.7145
Glyma.16G170100		0		1.3865	1.47357	2.50344	2.77941	3.38973	7.09686	8.10463	7.62269	7.7109	9.11438	7.23558	4.4272e-13	5.85133e-14	2.50344	2.77941	3.38973	7.09686	8.10463	7.62269	7.7109	9.11438	7.23558		2.89086	7.60806	8.02029
Glyma.07G035800		0		1.39056	1.40478	6.68709	6.99926	6.95589	18.0111	18.3793	17.945	19.7413	17.8626	17.0995	5.76763e-40	1.98709e-34	6.68709	6.99926	6.95589	18.0111	18.3793	17.945	19.7413	17.8626	17.0995		6.88075	18.1118	18.2345
Glyma.02G132100		nitrite reductase 1		1.39071	1.33852	17.1588	18.1072	19.6804	48.0733	46.8726	49.8457	49.8482	44.788	44.02	9.54642e-73	4.1089e-59	17.1588	18.1072	19.6804	48.0733	46.8726	49.8457	49.8482	44.788	44.02		18.3155	48.2639	46.2187
Glyma.14G071600		HXXXD-type acyl-transferase family protein		1.39141	1.73558	0.525656	0.357497	0.403234	1.21576	0.809347	1.44477	1.34953	1.3347	1.69044	0.000835866	4.12763e-07	0.525656	0.357497	0.403234	1.21576	0.809347	1.44477	1.34953	1.3347	1.69044		0.428796	1.15663	1.45823
Glyma.13G183700		serine carboxypeptidase-like 31		1.39709	1.22005	0.599713	0.352316	0.485324	1.25897	1.28284	1.27907	0.747149	1.57909	1.03244	3.51323e-05	0.00627634	0.599713	0.352316	0.485324	1.25897	1.28284	1.27907	0.747149	1.57909	1.03244		0.479118	1.27363	1.11956
Glyma.01G173800		ARM repeat superfamily protein		1.40009	1.40141	0.301339	0.533374	0.41555	1.04487	1.06909	1.20433	1.16196	1.11736	1.0231	2.41593e-06	2.35916e-06	0.301339	0.533374	0.41555	1.04487	1.06909	1.20433	1.16196	1.11736	1.0231		0.416754	1.1061	1.1008
Glyma.03G210200		Thioredoxin superfamily protein		1.40041	1.22294	0.716662	0.563011	1.33149	2.46499	2.75334	1.75079	1.14866	3.09715	1.87029	0.00447676	0.0467594	0.716662	0.563011	1.33149	2.46499	2.75334	1.75079	1.14866	3.09715	1.87029		0.870387	2.32304	2.0387
Glyma.13G119000		P-glycoprotein 11		1.40052	1.52353	0.603938	0.399391	0.573772	1.2985	1.46143	1.42318	1.42342	1.44127	1.67583	2.3435e-10	1.44276e-12	0.603938	0.399391	0.573772	1.2985	1.46143	1.42318	1.42342	1.44127	1.67583		0.5257	1.39437	1.5135
Glyma.11G014700		Protein of unknown function (DUF506)		1.40108	1.3898	5.84463	7.58372	9.58997	22.0017	20.5763	18.5971	18.0521	20.729	21.4917	1.24385e-18	7.16449e-19	5.84463	7.58372	9.58997	22.0017	20.5763	18.5971	18.0521	20.729	21.4917		7.67277	20.3917	20.0909
Glyma.20G101100		glutathione S-transferase TAU 8		1.40926	1.57394	0.566635	1.10386	1.62886	3.37296	2.99497	2.47585	3.22606	3.3183	3.27956	0.00051852	2.24849e-05	0.566635	1.10386	1.62886	3.37296	2.99497	2.47585	3.22606	3.3183	3.27956		1.09979	2.94793	3.27464
Glyma.09G080100		Cytidine/deoxycytidylate deaminase family protein		1.41056	1.44496	4.02331	4.45964	7.12309	16.0514	12.8566	12.8788	12.7081	13.5712	16.2261	4.35499e-12	2.94065e-13	4.02331	4.45964	7.12309	16.0514	12.8566	12.8788	12.7081	13.5712	16.2261		5.20201	13.9289	14.1685
Glyma.18G203100		Plant protein of unknown function (DUF828)		1.41667	1.51194	0.391514	0.569185	0.665791	1.34079	1.67669	1.35488	1.04871	1.79498	1.8083	5.60004e-05	6.54891e-05	0.391514	0.569185	0.665791	1.34079	1.67669	1.35488	1.04871	1.79498	1.8083		0.542163	1.45745	1.55066
Glyma.14G179200		0		1.41692	1.42887	2.57869	2.04194	2.17797	5.48723	6.99637	5.77178	5.74789	7.10454	5.4219	1.33493e-11	2.06665e-11	2.57869	2.04194	2.17797	5.48723	6.99637	5.77178	5.74789	7.10454	5.4219		2.2662	6.08513	6.09144
Glyma.08G178000		EXORDIUM like 2		1.42025	1.2515	1.35924	1.76782	1.18812	3.50461	3.14284	4.95972	3.77937	3.01341	3.47309	4.14659e-08	1.62951e-07	1.35924	1.76782	1.18812	3.50461	3.14284	4.95972	3.77937	3.01341	3.47309		1.43839	3.86906	3.42196
Glyma.10G248900		Haloacid dehalogenase-like hydrolase (HAD) superfamily protein		1.42217	1.41729	69.5615	70.571	78.5885	183.145	203.584	202.085	190.539	197.549	195.038	6.41921e-69	8.11456e-89	69.5615	70.571	78.5885	183.145	203.584	202.085	190.539	197.549	195.038		72.907	196.271	194.375
Glyma.04G251000		nodulin MtN21 /EamA-like transporter family protein		1.42441	1.57946	0.230442	0.42341	0.851407	1.25841	1.36964	1.44145	1.5586	1.46412	1.47676	0.00698508	0.00126932	0.230442	0.42341	0.851407	1.25841	1.36964	1.44145	1.5586	1.46412	1.47676		0.501753	1.3565	1.49983
Glyma.17G030000		MLP-like protein 423		1.42457	1.17522	0.737959	0.729492	0.660275	1.80988	2.08608	1.89214	1.05324	1.79539	1.98382	0.000189226	0.017934	0.737959	0.729492	0.660275	1.80988	2.08608	1.89214	1.05324	1.79539	1.98382		0.709242	1.92937	1.61081
Glyma.01G166000		Chaperone DnaJ-domain superfamily protein		1.4264	1.53468	19.2496	19.1334	18.3347	48.9354	51.4061	52.8171	52.6297	54.9608	56.457	6.54891e-62	6.14797e-81	19.2496	19.1334	18.3347	48.9354	51.4061	52.8171	52.6297	54.9608	56.457		18.9059	51.0528	54.6825
Glyma.08G173400		NAC domain containing protein 1		1.42715	1.54817	1.9871	2.16442	3.6314	6.75876	7.26172	7.03423	7.20955	7.81811	7.7317	3.23181e-10	1.09809e-12	1.9871	2.16442	3.6314	6.75876	7.26172	7.03423	7.20955	7.81811	7.7317		2.5943	7.01824	7.58645
Glyma.02G228300		mitogen-activated protein kinase kinase kinase 14		1.43331	1.1025	0.385214	0.492081	0.649134	0.930378	1.56174	1.64479	1.28012	1.19706	0.791468	0.000665571	0.0199931	0.385214	0.492081	0.649134	0.930378	1.56174	1.64479	1.28012	1.19706	0.791468		0.50881	1.37897	1.08955
Glyma.10G275900		carboxyesterase 17		1.43422	1.57304	0.616846	0.275386	0.276301	0.97215	1.2962	0.926234	0.801614	0.645498	2.06155	0.00838515	0.0143395	0.616846	0.275386	0.276301	0.97215	1.2962	0.926234	0.801614	0.645498	2.06155		0.389511	1.06486	1.16955
Glyma.06G032500	SIS	Sugar isomerase (SIS) family protein		1.44635	1.41513	3.10919	3.03704	3.87831	9.42159	8.64963	9.60796	8.43909	8.94609	9.48023	4.45094e-20	4.21454e-19	3.10919	3.03704	3.87831	9.42159	8.64963	9.60796	8.43909	8.94609	9.48023		3.34151	9.22639	8.95514
Glyma.02G297100		Leucine-rich repeat protein kinase family protein		1.4476	1.94699	0.202786	0.202061	0.131367	0.441748	0.537081	0.493455	0.583909	0.608024	0.87798	0.00590106	1.7528e-05	0.202786	0.202061	0.131367	0.441748	0.537081	0.493455	0.583909	0.608024	0.87798		0.178738	0.490761	0.689971
Glyma.19G011700		Peroxidase superfamily protein		1.45201	1.53095	0.93276	1.02191	1.03611	3.16349	2.88304	2.69201	3.04722	2.85823	2.53713	2.52594e-15	5.75334e-17	0.93276	1.02191	1.03611	3.16349	2.88304	2.69201	3.04722	2.85823	2.53713		0.996926	2.91285	2.81419
Glyma.19G207400		Thioredoxin superfamily protein		1.45771	1.42919	0.481337	0.550389	0.786939	1.23496	1.78491	2.01392	1.38431	2.07005	1.44378	0.00274914	0.00362457	0.481337	0.550389	0.786939	1.23496	1.78491	2.01392	1.38431	2.07005	1.44378		0.606222	1.67793	1.63271
Glyma.18G061100		glutamine-dependent asparagine synthase 1		1.45958	1.53033	8.74473	11.3131	11.0602	25.3343	24.6466	28.5766	29.8728	30.5387	27.9025	1.55156e-57	4.28691e-72	8.74473	11.3131	11.0602	25.3343	24.6466	28.5766	29.8728	30.5387	27.9025		10.3727	26.1859	29.438
Glyma.16G057600		chloride channel B		1.45964	1.36667	4.72602	4.37476	5.38936	12.4643	13.3386	14.2371	13.3737	12.2181	11.6972	8.0144e-47	4.03929e-42	4.72602	4.37476	5.38936	12.4643	13.3386	14.2371	13.3737	12.2181	11.6972		4.83005	13.3467	12.4297
Glyma.08G179700		Peroxidase superfamily protein		1.4616	1.36553	0.270874	0.195478	0.294516	0.905136	0.500023	0.719307	0.711324	0.573516	0.689581	0.0168853	0.0270683	0.270874	0.195478	0.294516	0.905136	0.500023	0.719307	0.711324	0.573516	0.689581		0.253623	0.708155	0.65814
Glyma.01G217700		osmotin 34		1.46686	1.412	2.01939	1.98461	2.21527	4.77108	7.18543	5.31962	5.71221	4.73906	6.08317	3.98229e-11	2.07184e-12	2.01939	1.98461	2.21527	4.77108	7.18543	5.31962	5.71221	4.73906	6.08317		2.07309	5.75871	5.51148
Glyma.05G069150		DYNAMIN-like 1C		1.47452	1.29997	0.638791	0.666002	1.41179	3.04909	2.50806	2.06138	2.2211	2.12046	2.34841	4.77547e-05	0.000381804	0.638791	0.666002	1.41179	3.04909	2.50806	2.06138	2.2211	2.12046	2.34841		0.905527	2.53951	2.22999
Glyma.14G102900		WRKY DNA-binding protein 40		1.47471	1.69211	0.852186	1.05927	1.12704	2.82416	2.57697	3.1135	3.67546	2.81088	3.33934	1.52887e-08	2.32343e-11	0.852186	1.05927	1.12704	2.82416	2.57697	3.1135	3.67546	2.81088	3.33934		1.01283	2.83821	3.27523
Glyma.09G022300		peroxidase 2		1.47481	1.56084	0.588985	0.820279	0.695363	2.02666	2.06545	1.80052	1.83678	2.22259	2.1464	6.61259e-07	1.30533e-07	0.588985	0.820279	0.695363	2.02666	2.06545	1.80052	1.83678	2.22259	2.1464		0.701542	1.96421	2.06859
Glyma.14G201000		O-methyltransferase family protein		1.47605	1.24886	2.804	3.21568	2.99224	8.78197	7.9269	8.50545	6.68355	7.43519	7.27051	2.55299e-28	2.53767e-18	2.804	3.21568	2.99224	8.78197	7.9269	8.50545	6.68355	7.43519	7.27051		3.00397	8.40477	7.12975
Glyma.08G010500		HXXXD-type acyl-transferase family protein		1.48096	1.34579	1.05862	1.10524	0.530071	2.41653	2.52088	2.62444	2.47427	1.99391	2.36965	5.86205e-07	1.62451e-05	1.05862	1.10524	0.530071	2.41653	2.52088	2.62444	2.47427	1.99391	2.36965		0.89798	2.52061	2.27928
Glyma.17G120767		O-Glycosyl hydrolases family 17 protein		1.49223	1.0757	0.56185	0.454273	0.396413	1.141	1.54394	1.31007	0.862708	1.10781	1.00994	9.21444e-06	0.00767695	0.56185	0.454273	0.396413	1.141	1.54394	1.31007	0.862708	1.10781	1.00994		0.470845	1.33167	0.993488
Glyma.19G223000		Glycosyl hydrolase superfamily protein		1.49654	1.51436	3.77573	4.21588	4.96614	11.8588	13.7568	12.465	11.4788	12.1977	14.2171	6.47279e-33	8.7909e-38	3.77573	4.21588	4.96614	11.8588	13.7568	12.465	11.4788	12.1977	14.2171		4.31925	12.6935	12.6312
Glyma.03G221350		glycerol-3-phosphate acyltransferase 2		1.5003	1.59107	3.46014	3.71586	4.64284	10.1035	11.2829	11.0968	11.8424	11.4047	11.9815	7.30089e-31	7.43819e-39	3.46014	3.71586	4.64284	10.1035	11.2829	11.0968	11.8424	11.4047	11.9815		3.93962	10.8278	11.7429
Glyma.20G169400		Protein kinase superfamily protein		1.5036	1.38984	0.180147	0.187206	0.094653	0.424804	0.449172	0.479652	0.510159	0.480021	0.362189	0.00548407	0.0212749	0.180147	0.187206	0.094653	0.424804	0.449172	0.479652	0.510159	0.480021	0.362189		0.154002	0.451209	0.45079
Glyma.20G028350		Protein of unknown function (DUF567)		1.50535	1.43682	1.16042	1.4215	2.32178	4.9338	4.70263	4.38051	4.64875	3.17042	5.47305	2.09733e-07	1.2431e-05	1.16042	1.4215	2.32178	4.9338	4.70263	4.38051	4.64875	3.17042	5.47305		1.63457	4.67231	4.43074
Glyma.03G113200		NAD(P)-binding Rossmann-fold superfamily protein		1.506	1.46773	4.28911	4.85163	6.43392	16.2945	14.961	13.3533	14.4394	13.4496	15.2164	2.22663e-21	1.39664e-21	4.28911	4.85163	6.43392	16.2945	14.961	13.3533	14.4394	13.4496	15.2164		5.19155	14.8696	14.3685
Glyma.04G103400		tetratricopeptide repeat (TPR)-containing protein		1.51205	1.65851	0.531854	0.590566	0.413674	1.39845	1.27683	1.73732	1.63719	1.8475	1.36896	9.93471e-09	5.42005e-11	0.531854	0.590566	0.413674	1.39845	1.27683	1.73732	1.63719	1.8475	1.36896		0.512031	1.47086	1.61788
Glyma.01G051300	NAP	NAC-like, activated by AP3/PI		1.51213	1.56511	0.639318	0.59375	0.373289	1.42925	1.52182	1.66442	1.86416	1.50377	1.39099	7.06227e-05	5.51201e-05	0.639318	0.59375	0.373289	1.42925	1.52182	1.66442	1.86416	1.50377	1.39099		0.535452	1.5385	1.58631
Glyma.10G053000		0		1.52033	1.4413	4.37315	3.61117	6.23962	12.2343	14.6411	14.412	9.87547	11.255	17.782	4.16738e-05	0.000766421	4.37315	3.61117	6.23962	12.2343	14.6411	14.412	9.87547	11.255	17.782		4.74131	13.7624	12.9708
Glyma.15G173800		RING/U-box superfamily protein		1.52097	1.51076	0.578526	0.544475	0.850362	2.07413	1.99619	1.68542	2.06217	1.92785	1.67381	1.50871e-05	2.70283e-05	0.578526	0.544475	0.850362	2.07413	1.99619	1.68542	2.06217	1.92785	1.67381		0.657788	1.91858	1.88794
Glyma.13G256000		Cox19-like CHCH family protein		1.52219	1.46896	6.25771	8.64012	7.35727	23.8981	21.4875	18.946	20.1045	21.8998	19.4964	2.67583e-24	1.77664e-24	6.25771	8.64012	7.35727	23.8981	21.4875	18.946	20.1045	21.8998	19.4964		7.41837	21.4439	20.5003
Glyma.03G147900		Disease resistance-responsive (dirigent-like protein) family protein		1.52312	1.37347	0.635979	0.710118	1.38066	2.68048	2.63877	2.5877	2.12364	2.30705	2.65438	1.64632e-05	0.000265776	0.635979	0.710118	1.38066	2.68048	2.63877	2.5877	2.12364	2.30705	2.65438		0.908919	2.63565	2.36169
Glyma.20G105300		ACT-like protein tyrosine kinase family protein		1.52531	1.54662	3.18671	3.11605	3.39991	8.90726	10.0388	9.16151	9.74409	9.29171	9.33463	3.40271e-43	8.43647e-49	3.18671	3.11605	3.39991	8.90726	10.0388	9.16151	9.74409	9.29171	9.33463		3.23422	9.36918	9.45681
Glyma.02G214600		Homeodomain-like superfamily protein		1.52946	1.61808	0.649092	0.977732	0.685307	2.22724	2.07233	1.82351	1.77737	2.28731	2.04508	3.71311e-08	4.69025e-09	0.649092	0.977732	0.685307	2.22724	2.07233	1.82351	1.77737	2.28731	2.04508		0.77071	2.04103	2.03659
Glyma.07G244700		Protein phosphatase 2C family protein		1.54322	1.43993	1.00057	1.26396	0.806531	3.02001	2.92047	3.0524	2.42105	2.69713	3.20494	2.77572e-11	1.00272e-08	1.00057	1.26396	0.806531	3.02001	2.92047	3.0524	2.42105	2.69713	3.20494		1.02369	2.99762	2.77437
Glyma.02G082500		Vacuolar iron transporter (VIT) family protein		1.54824	1.53179	0.14436	0.340767	0.479343	1.10789	1.12504	0.653521	1.48517	0.796118	0.545176	0.0153583	0.0309133	0.14436	0.340767	0.479343	1.10789	1.12504	0.653521	1.48517	0.796118	0.545176		0.32149	0.962149	0.942153
Glyma.17G242900		phosphatidic acid phosphohydrolase 2		1.54978	1.51529	0.127451	0.113044	0.076648	0.28329	0.277723	0.364267	0.337346	0.226688	0.338364	0.0137527	0.0222356	0.127451	0.113044	0.076648	0.28329	0.277723	0.364267	0.337346	0.226688	0.338364		0.105714	0.308427	0.300799
Glyma.15G031500		NAD(P)-binding Rossmann-fold superfamily protein		1.5499	1.47611	13.108	11.7226	13.4765	39.4552	36.8921	36.5054	37.481	32.7251	36.2592	5.64792e-26	2.61511e-21	13.108	11.7226	13.4765	39.4552	36.8921	36.5054	37.481	32.7251	36.2592		12.769	37.6176	35.4884
Glyma.16G004500		aminopeptidase M1		1.55013	1.70201	1.12131	0.760668	1.34607	2.51779	3.91523	3.11437	2.2531	4.33612	4.01803	0.03434	0.0178143	1.12131	0.760668	1.34607	2.51779	3.91523	3.11437	2.2531	4.33612	4.01803		1.07602	3.18246	3.53575
Glyma.04G042400		S-locus lectin protein kinase family protein		1.55553	1.85545	0.092006	0.111149	0.163049	0.442507	0.413555	0.240224	0.587981	0.356271	0.391928	0.0105046	0.00054666	0.092006	0.111149	0.163049	0.442507	0.413555	0.240224	0.587981	0.356271	0.391928		0.122068	0.365429	0.445393
Glyma.13G242100		Aluminium induced protein with YGL and LRDR motifs		1.56441	1.5533	2.01556	1.37865	1.85532	4.89644	5.58787	5.12113	5.39467	5.63694	4.33867	2.61559e-18	4.34497e-16	2.01556	1.37865	1.85532	4.89644	5.58787	5.12113	5.39467	5.63694	4.33867		1.74985	5.20181	5.12343
Glyma.15G169100	XET	xyloglucan endotransglycosylase 6		1.56456	1.50551	15.9171	16.16	17.9434	50.4408	47.3444	50.961	47.9992	48.3276	45.4387	1.80901e-78	5.27952e-73	15.9171	16.16	17.9434	50.4408	47.3444	50.961	47.9992	48.3276	45.4387		16.6735	49.5821	47.2551
Glyma.11G038600	JAZ	TIFY domain/Divergent CCT motif family protein		1.56896	1.52863	12.8965	15.3291	10.1197	35.5452	38.0424	40.6794	35.1299	38.389	36.8927	2.38416e-31	1.02501e-32	12.8965	15.3291	10.1197	35.5452	38.0424	40.6794	35.1299	38.389	36.8927		12.7818	38.089	36.8039
Glyma.01G185800		heat shock factor 4		1.56925	1.54666	0.846112	0.80296	0.785981	2.05883	2.60066	2.61463	2.17623	2.3845	2.56053	1.41892e-15	9.40502e-17	0.846112	0.80296	0.785981	2.05883	2.60066	2.61463	2.17623	2.3845	2.56053		0.811684	2.42471	2.37375
Glyma.14G080200		Protein of unknown function (DUF1645)		1.56929	1.65974	0.572613	0.651461	0.650799	1.79469	1.78861	2.02644	1.84538	2.1214	1.96665	5.84562e-08	6.01317e-09	0.572613	0.651461	0.650799	1.79469	1.78861	2.02644	1.84538	2.1214	1.96665		0.624958	1.86991	1.97781
Glyma.18G094800		0		1.57178	1.15552	0.71803	0.706292	0.823313	2.28269	2.07306	2.37769	1.67042	1.42267	1.91132	1.30475e-08	0.000761985	0.71803	0.706292	0.823313	2.28269	2.07306	2.37769	1.67042	1.42267	1.91132		0.749212	2.24448	1.66814
Glyma.13G076200		Disease resistance protein (TIR-NBS-LRR class) family		1.58319	1.42911	0.117833	0.047809	0.042307	0.229873	0.1884	0.305088	0.224245	0.09968	0.236174	0.00504719	0.0432551	0.117833	0.047809	0.042307	0.229873	0.1884	0.305088	0.224245	0.09968	0.236174		0.0693163	0.24112	0.1867
Glyma.13G208100	protease	Eukaryotic aspartyl protease family protein		1.59324	1.60992	1.6874	2.14241	2.06897	5.80211	5.57788	6.52493	7.02799	5.36536	5.58579	4.25576e-21	7.53133e-19	1.6874	2.14241	2.06897	5.80211	5.57788	6.52493	7.02799	5.36536	5.58579		1.96626	5.96831	5.99305
Glyma.08G293200		Domain of unknown function (DUF23)		1.5937	1.27235	0.637325	0.662561	0.470023	2.0642	1.52656	1.80423	1.42221	1.49508	1.3593	1.58505e-08	3.46603e-05	0.637325	0.662561	0.470023	2.0642	1.52656	1.80423	1.42221	1.49508	1.3593		0.58997	1.79833	1.42553
Glyma.11G170300		glutamine-dependent asparagine synthase 1		1.59695	1.5477	3.8111	3.28379	3.38894	10.1712	11.3889	10.319	10.4273	10.2181	9.95722	6.91553e-44	6.81785e-44	3.8111	3.28379	3.38894	10.1712	11.3889	10.319	10.4273	10.2181	9.95722		3.49461	10.6264	10.2009
Glyma.17G140200		Bifunctional inhibitor/lipid-transfer protein/seed storage 2S albumin superfamily protein		1.60152	1.52006	1.75404	1.70535	2.10968	5.68413	5.50305	5.84969	4.92989	5.66613	5.3946	3.25139e-13	5.07258e-11	1.75404	1.70535	2.10968	5.68413	5.50305	5.84969	4.92989	5.66613	5.3946		1.85636	5.67896	5.33021
Glyma.14G201100		O-methyltransferase family protein		1.6085	1.34945	0.358934	0.340991	0.390667	0.997119	1.23536	1.10903	0.72938	0.887284	1.16312	1.03048e-09	2.07909e-05	0.358934	0.340991	0.390667	0.997119	1.23536	1.10903	0.72938	0.887284	1.16312		0.363531	1.11384	0.926596
Glyma.08G235400		kunitz trypsin inhibitor 1		1.62292	1.2997	0.315114	0.503361	1.13169	2.66425	1.8497	1.56517	1.65002	1.62457	1.53544	0.00316203	0.0288182	0.315114	0.503361	1.13169	2.66425	1.8497	1.56517	1.65002	1.62457	1.53544		0.650054	2.02637	1.60334
Glyma.07G243900		MLP-like protein 423		1.62466	1.76759	1.61788	1.71573	2.69843	5.70613	6.481	6.55738	5.75417	7.50619	7.31177	7.03729e-11	7.5296e-13	1.61788	1.71573	2.69843	5.70613	6.481	6.55738	5.75417	7.50619	7.31177		2.01068	6.24817	6.85738
Glyma.10G109500		Transmembrane amino acid transporter family protein		1.62825	1.75394	0.474693	0.454641	0.793213	1.70004	1.75412	2.11527	1.87243	1.95635	2.09805	6.03165e-08	2.80523e-10	0.474693	0.454641	0.793213	1.70004	1.75412	2.11527	1.87243	1.95635	2.09805		0.574182	1.85648	1.97561
Glyma.14G148300		nodulin MtN21 /EamA-like transporter family protein		1.62835	1.93273	0.14648	0.21752	0.149611	0.376485	0.525259	0.701503	0.46903	0.795259	0.705737	0.00496597	0.000138677	0.14648	0.21752	0.149611	0.376485	0.525259	0.701503	0.46903	0.795259	0.705737		0.171204	0.534416	0.656675
Glyma.13G084000		nitrate reductase 1		1.63255	1.68422	12.7247	13.4715	14.7137	39.3104	42.6709	45.4498	48.5787	41.4729	41.1324	1.14409e-80	5.03569e-83	12.7247	13.4715	14.7137	39.3104	42.6709	45.4498	48.5787	41.4729	41.1324		13.6366	42.477	43.728
Glyma.08G232100		potassium channel in Arabidopsis thaliana 1		1.63314	1.36639	0.385786	0.196045	0.316395	1.06814	0.875885	0.869736	1.01915	0.686078	0.613241	9.24995e-06	0.00218115	0.385786	0.196045	0.316395	1.06814	0.875885	0.869736	1.01915	0.686078	0.613241		0.299409	0.937919	0.772822
Glyma.02G123200		O-fucosyltransferase family protein		1.63508	1.59721	0.843794	0.944103	1.25858	3.10832	2.87911	2.90463	3.26921	2.77749	3.13173	5.20284e-20	8.48862e-17	0.843794	0.944103	1.25858	3.10832	2.87911	2.90463	3.26921	2.77749	3.13173		1.01549	2.96402	3.05948
Glyma.17G070700		Class I glutamine amidotransferase-like superfamily protein		1.64418	1.53158	0.28822	0.128971	0.428678	0.836956	0.991114	0.851364	0.641702	0.969495	0.847411	0.00571057	0.0172421	0.28822	0.128971	0.428678	0.836956	0.991114	0.851364	0.641702	0.969495	0.847411		0.281956	0.893145	0.819536
Glyma.18G005000		Protein of unknown function (DUF 3339)		1.64566	1.45013	1.81151	1.13075	1.01408	3.67834	3.57831	5.21949	4.77854	3.16736	2.8752	1.81107e-06	0.000150594	1.81151	1.13075	1.01408	3.67834	3.57831	5.21949	4.77854	3.16736	2.8752		1.31878	4.15871	3.60703
Glyma.19G211600		senescence-associated gene 21		1.65215	1.77213	1.2973	1.66143	1.28571	5.10007	4.01018	4.37962	4.3813	4.74539	5.4227	1.93845e-08	5.56796e-10	1.2973	1.66143	1.28571	5.10007	4.01018	4.37962	4.3813	4.74539	5.4227		1.41481	4.49662	4.8498
Glyma.08G270500		0		1.66739	1.80623	0.305586	0.283595	0.343463	1.05614	1.26303	0.665332	0.766157	1.45196	1.04593	0.000231124	3.4447e-05	0.305586	0.283595	0.343463	1.05614	1.26303	0.665332	0.766157	1.45196	1.04593		0.310881	0.994836	1.08801
Glyma.06G032451	SIS	Sugar isomerase (SIS) family protein		1.67075	1.62262	2.03563	2.06664	2.74841	7.66338	7.05786	7.21586	6.67674	7.63609	6.76699	4.21372e-13	1.36604e-11	2.03563	2.06664	2.74841	7.66338	7.05786	7.21586	6.67674	7.63609	6.76699		2.28356	7.31237	7.02661
Glyma.07G045700		0		1.67637	1.35224	0.262304	0.586328	0.64812	2.01393	1.14922	1.66568	1.04071	1.47871	1.29224	0.00176014	0.0244403	0.262304	0.586328	0.64812	2.01393	1.14922	1.66568	1.04071	1.47871	1.29224		0.498917	1.60961	1.27055
Glyma.04G250600		nodulin MtN21 /EamA-like transporter family protein		1.67764	1.87807	0.362244	0.535421	0.467412	1.24403	1.47686	1.69814	1.9047	1.6741	1.46474	3.39025e-06	3.01927e-08	0.362244	0.535421	0.467412	1.24403	1.47686	1.69814	1.9047	1.6741	1.46474		0.455026	1.47301	1.68118
Glyma.15G022300	ILR	peptidase M20/M25/M40 family protein		1.68215	1.61696	5.79604	5.44436	6.54998	18.3966	19.2225	19.7626	17.06	17.1931	20.2783	7.15199e-56	4.03801e-46	5.79604	5.44436	6.54998	18.3966	19.2225	19.7626	17.06	17.1931	20.2783		5.93013	19.1272	18.1771
Glyma.19G172200		heat shock protein 70		1.6829	1.76716	29.6736	29.1836	26.5526	121.318	29.9567	121.76	125.738	128.886	31.1885	0.0377929	0.0285376	29.6736	29.1836	26.5526	121.318	29.9567	121.76	125.738	128.886	31.1885		28.4699	91.0115	95.2709
Glyma.06G272900		Cysteine proteinases superfamily protein		1.68705	2.07753	0.23997	0.110399	0.23058	0.510898	0.95286	0.424473	0.845609	0.765329	0.851179	0.0153099	9.67641e-05	0.23997	0.110399	0.23058	0.510898	0.95286	0.424473	0.845609	0.765329	0.851179		0.19365	0.62941	0.820706
Glyma.15G270100		0		1.69013	1.70092	4.63677	5.00005	7.54533	19.0909	19.2919	17.4169	18.8559	17.5471	19.4253	2.76297e-20	3.40554e-21	4.63677	5.00005	7.54533	19.0909	19.2919	17.4169	18.8559	17.5471	19.4253		5.72738	18.5999	18.6094
Glyma.01G216000		Integrase-type DNA-binding superfamily protein		1.69883	1.93554	0.77146	0.983804	0.185761	1.88623	2.31141	2.15947	2.26945	2.33408	2.83799	0.00256358	0.000159916	0.77146	0.983804	0.185761	1.88623	2.31141	2.15947	2.26945	2.33408	2.83799		0.647008	2.11904	2.48051
Glyma.10G130400		Ran BP2/NZF zinc finger-like superfamily protein		1.70221	1.57155	0.692111	0.905936	0.932907	4.48336	2.61238	1.52495	2.38131	2.44538	3.02708	0.0178928	0.0191786	0.692111	0.905936	0.932907	4.48336	2.61238	1.52495	2.38131	2.44538	3.02708		0.843651	2.87356	2.61792
Glyma.15G024600		Glycosyl hydrolases family 32 protein		1.70464	1.71391	0.039048	0.118799	0.105738	0.260452	0.273999	0.330619	0.231511	0.313265	0.327808	0.0345635	0.0357446	0.039048	0.118799	0.105738	0.260452	0.273999	0.330619	0.231511	0.313265	0.327808		0.0878617	0.288357	0.290861
Glyma.19G154400		isopentenyltransferase 3		1.70739	1.66457	0.10957	0.074924	0.110682	0.236199	0.266833	0.486947	0.417223	0.259434	0.269559	0.0392618	0.0421134	0.10957	0.074924	0.110682	0.236199	0.266833	0.486947	0.417223	0.259434	0.269559		0.098392	0.329993	0.315405
Glyma.06G300100		myb domain protein 14		1.70777	1.64072	0.638247	0.910614	0.857555	2.39972	2.69228	2.80858	2.48621	2.61689	2.39234	5.84506e-10	5.60633e-09	0.638247	0.910614	0.857555	2.39972	2.69228	2.80858	2.48621	2.61689	2.39234		0.802139	2.63353	2.49848
Glyma.05G069200		0		1.72047	1.50361	0.389214	0.66023	0.404274	2.26849	1.43454	1.18365	1.41579	1.08994	1.66258	0.00420353	0.0194289	0.389214	0.66023	0.404274	2.26849	1.43454	1.18365	1.41579	1.08994	1.66258		0.484573	1.62889	1.38943
Glyma.15G211300		NAD(P)-binding Rossmann-fold superfamily protein		1.72076	1.76979	0.492762	0.556127	1.01792	2.00821	2.50512	2.38857	1.80239	2.40154	2.89965	3.2549e-06	3.16838e-06	0.492762	0.556127	1.01792	2.00821	2.50512	2.38857	1.80239	2.40154	2.89965		0.688938	2.30063	2.36786
Glyma.17G119000		0		1.72083	1.67194	0.682477	1.4595	1.58561	4.5263	3.6763	4.21407	4.87857	3.91563	3.09291	2.92691e-06	2.21278e-05	0.682477	1.4595	1.58561	4.5263	3.6763	4.21407	4.87857	3.91563	3.09291		1.24253	4.13889	3.96237
Glyma.13G309900		mitogen-activated protein kinase kinase kinase 15		1.72092	2.11488	0.094202	0.081722	0.12907	0.200707	0.472218	0.336277	0.40761	0.195548	0.722141	0.0494338	0.00922789	0.094202	0.081722	0.12907	0.200707	0.472218	0.336277	0.40761	0.195548	0.722141		0.101665	0.336401	0.441766
Glyma.19G239800	SDH	dehydroquinate dehydratase, putative / shikimate dehydrogenase, putative		1.72595	1.50715	1.89458	1.53804	2.10855	6.51351	5.99303	5.94229	4.62484	4.86255	6.26877	6.90842e-23	1.07414e-13	1.89458	1.53804	2.10855	6.51351	5.99303	5.94229	4.62484	4.86255	6.26877		1.84706	6.14961	5.25206
Glyma.04G026400		glyoxal oxidase-related protein		1.73572	1.72464	5.76076	5.00988	5.01099	15.0294	18.7379	19.0123	17.4674	16.6761	17.9363	6.42961e-46	2.30022e-68	5.76076	5.00988	5.01099	15.0294	18.7379	19.0123	17.4674	16.6761	17.9363		5.26055	17.5932	17.3599
Glyma.01G204400	JAZ	TIFY domain/Divergent CCT motif family protein		1.73782	1.77104	17.3208	17.7207	15.3175	55.0015	54.8323	58.9249	56.0412	60.8454	54.6283	1.10565e-92	8.10793e-96	17.3208	17.7207	15.3175	55.0015	54.8323	58.9249	56.0412	60.8454	54.6283		16.7863	56.2529	57.1716
Glyma.18G265800		UDP-Glycosyltransferase superfamily protein		1.74931	2.15344	0.310577	0.340861	0.120049	0.719666	0.877195	1.01572	1.08768	1.07918	1.2798	7.70583e-05	1.53499e-08	0.310577	0.340861	0.120049	0.719666	0.877195	1.01572	1.08768	1.07918	1.2798		0.257162	0.870859	1.14889
Glyma.20G044500		0		1.74968	1.78483	0.664429	0.892774	0.713708	3.9596	1.63377	2.25867	1.87844	3.57085	2.50907	0.00898243	0.0047323	0.664429	0.892774	0.713708	3.9596	1.63377	2.25867	1.87844	3.57085	2.50907		0.75697	2.61735	2.65278
Glyma.19G221800		Chitinase family protein		1.75059	1.86306	0.137969	0.109349	0.173477	0.347295	0.418175	0.670953	0.36385	0.616124	0.573243	0.0328689	0.0156326	0.137969	0.109349	0.173477	0.347295	0.418175	0.670953	0.36385	0.616124	0.573243		0.140265	0.478808	0.517739
Glyma.06G145300		Peroxidase superfamily protein		1.75192	1.74628	0.579349	0.226873	0.394098	1.75468	1.1253	1.22958	1.08625	1.81847	1.14024	0.000212538	0.000347432	0.579349	0.226873	0.394098	1.75468	1.1253	1.22958	1.08625	1.81847	1.14024		0.400107	1.36985	1.34832
Glyma.04G041200		DREB and EAR motif protein 3		1.7548	1.77593	6.41454	7.12588	6.83751	22.3953	22.7492	27.4255	22.8976	28.0617	22.3347	1.3547e-46	3.75612e-46	6.41454	7.12588	6.83751	22.3953	22.7492	27.4255	22.8976	28.0617	22.3347		6.79264	24.19	24.4313
Glyma.08G042100		myb domain protein 62		1.75736	1.72047	0.302133	0.268514	0.555096	1.75324	1.15015	0.979406	1.23109	1.38714	1.11957	0.000362904	0.000249502	0.302133	0.268514	0.555096	1.75324	1.15015	0.979406	1.23109	1.38714	1.11957		0.375248	1.29426	1.24593
Glyma.15G226650		0		1.76907	1.46155	0.559369	0.757532	0.71914	2.21293	2.74732	2.04076	1.41276	1.75866	2.454	4.85685e-09	6.37004e-05	0.559369	0.757532	0.71914	2.21293	2.74732	2.04076	1.41276	1.75866	2.454		0.67868	2.33367	1.87514
Glyma.08G036600		BURP domain-containing protein		1.77282	1.52851	0.238904	0.380079	0.229569	1.32603	0.631733	0.956631	0.792032	0.819996	0.825562	0.00139546	0.00655759	0.238904	0.380079	0.229569	1.32603	0.631733	0.956631	0.792032	0.819996	0.825562		0.282851	0.971464	0.81253
Glyma.07G074300		Homeodomain-like transcriptional regulator		1.77388	1.8806	0.388502	0.523798	1.27261	2.51613	2.23714	2.7822	2.82321	2.27142	2.97379	3.52898e-05	5.18194e-06	0.388502	0.523798	1.27261	2.51613	2.23714	2.7822	2.82321	2.27142	2.97379		0.728304	2.51182	2.68947
Glyma.11G159021		Protein of unknown function (DUF793)		1.77736	1.53896	0.635672	0.611928	0.89274	2.27029	2.6244	2.47695	1.89375	2.22287	2.09163	9.08131e-10	1.23961e-06	0.635672	0.611928	0.89274	2.27029	2.6244	2.47695	1.89375	2.22287	2.09163		0.713447	2.45721	2.06942
Glyma.07G197100		Protein of unknown function (DUF506)		1.78211	1.37245	0.735677	0.685858	0.920032	2.69457	3.01176	2.41522	1.45225	1.99554	2.62967	2.66353e-11	9.21724e-05	0.735677	0.685858	0.920032	2.69457	3.01176	2.41522	1.45225	1.99554	2.62967		0.780522	2.70718	2.02582
Glyma.16G020500		Basic helix-loop-helix (bHLH) DNA-binding family protein		1.80594	1.81431	1.11835	1.43077	1.11833	4.42607	4.09786	4.38956	4.36603	4.21605	4.31676	5.79904e-25	3.69627e-25	1.11835	1.43077	1.11833	4.42607	4.09786	4.38956	4.36603	4.21605	4.31676		1.22248	4.3045	4.29961
Glyma.11G093100		cytochrome P450, family 81, subfamily D, polypeptide 8		1.80699	1.93888	0.150768	0.196634	0.244963	0.733674	0.591598	0.765538	0.861534	0.655747	0.757449	1.46906e-05	1.73669e-06	0.150768	0.196634	0.244963	0.733674	0.591598	0.765538	0.861534	0.655747	0.757449		0.197455	0.696937	0.758243
Glyma.16G123400		0		1.81969	1.76164	2.69474	2.78527	2.78142	10.6965	9.92041	8.75343	8.31915	7.52405	12.1953	9.68995e-27	1.33358e-16	2.69474	2.78527	2.78142	10.6965	9.92041	8.75343	8.31915	7.52405	12.1953		2.75381	9.7901	9.34617
Glyma.03G132900		beta-1,3-glucanase 1		1.82916	1.80642	1.44449	1.8582	1.93902	5.47205	7.53145	5.73851	5.89043	6.49757	5.94532	7.99841e-20	9.18497e-24	1.44449	1.8582	1.93902	5.47205	7.53145	5.73851	5.89043	6.49757	5.94532		1.74724	6.24734	6.11111
Glyma.09G092700		0		1.84483	2.09093	0.278338	0.352353	0.322582	1.1657	1.31076	0.978778	1.25255	1.31061	1.5067	1.97391e-05	1.61579e-07	0.278338	0.352353	0.322582	1.1657	1.31076	0.978778	1.25255	1.31061	1.5067		0.317758	1.15174	1.35662
Glyma.04G035000		allene oxide synthase		1.84502	1.73023	0.180179	0.120507	0.1535	0.565092	0.402254	0.672952	0.584357	0.420517	0.499364	0.000404912	0.001281	0.180179	0.120507	0.1535	0.565092	0.402254	0.672952	0.584357	0.420517	0.499364		0.151395	0.546766	0.501413
Glyma.02G136200	2ODD	2-oxoglutarate (2OG) and Fe(II)-dependent oxygenase superfamily protein		1.86035	1.98511	0.904055	0.899643	0.767335	3.03874	3.17399	3.18689	2.96802	3.14258	4.0829	1.12765e-16	6.42201e-17	0.904055	0.899643	0.767335	3.03874	3.17399	3.18689	2.96802	3.14258	4.0829		0.857011	3.13321	3.39783
Glyma.12G032900		Protein kinase protein with adenine nucleotide alpha hydrolases-like domain		1.86912	1.70993	0.384531	0.413447	0.52022	1.50104	1.88138	1.45681	1.58247	1.30089	1.48553	4.77172e-12	8.39024e-10	0.384531	0.413447	0.52022	1.50104	1.88138	1.45681	1.58247	1.30089	1.48553		0.439399	1.61308	1.4563
Glyma.15G150300		MATE efflux family protein		1.87008	1.56234	0.163114	0.13715	0.120427	0.51042	0.447692	0.585363	0.513472	0.414931	0.307993	0.000188651	0.0102948	0.163114	0.13715	0.120427	0.51042	0.447692	0.585363	0.513472	0.414931	0.307993		0.14023	0.514492	0.412132
Glyma.06G302200		terpene synthase-like sequence-1,8-cineole		1.8708	1.89709	4.01748	3.83359	4.93174	15.3633	14.915	16.7336	16.0832	17.0111	14.4426	7.15199e-56	9.40844e-56	4.01748	3.83359	4.93174	15.3633	14.915	16.7336	16.0832	17.0111	14.4426		4.26093	15.6706	15.8457
Glyma.07G011800		Pyridoxal phosphate phosphatase-related protein		1.88604	2.29506	0.302266	0.242618	0.429618	1.18256	1.26775	1.18653	1.77996	1.58343	1.42959	2.77961e-05	1.38005e-08	0.302266	0.242618	0.429618	1.18256	1.26775	1.18653	1.77996	1.58343	1.42959		0.324834	1.21228	1.59766
Glyma.04G042500		S-locus lectin protein kinase family protein		1.88728	1.87038	0.138683	0.08482	0.187324	0.663668	0.386367	0.489847	0.559166	0.400616	0.546216	0.000110744	9.29269e-05	0.138683	0.08482	0.187324	0.663668	0.386367	0.489847	0.559166	0.400616	0.546216		0.136942	0.513294	0.501999
Glyma.13G234700		NAC domain containing protein 73		1.90565	1.57898	0.602458	0.476762	0.548417	1.91454	2.2869	1.94955	1.84659	1.27441	1.75313	4.37065e-14	1.36008e-07	0.602458	0.476762	0.548417	1.91454	2.2869	1.94955	1.84659	1.27441	1.75313		0.542546	2.05033	1.62471
Glyma.02G190900		0		1.9064	2.03237	1.33859	1.38256	1.13866	4.57041	5.30626	4.66432	5.69881	6.65611	3.37573	1.42687e-14	2.41893e-11	1.33859	1.38256	1.13866	4.57041	5.30626	4.66432	5.69881	6.65611	3.37573		1.2866	4.847	5.24355
Glyma.07G133900		laccase 17		1.92658	2.63072	0.057371	0.077424	0.183637	0.294119	0.597122	0.325065	0.481902	0.970923	0.515279	0.00853797	5.85463e-06	0.057371	0.077424	0.183637	0.294119	0.597122	0.325065	0.481902	0.970923	0.515279		0.106144	0.405435	0.656035
Glyma.17G244200		phospholipase A 2A		1.92736	1.68668	0.700528	0.597466	0.619118	2.5377	2.18098	2.6273	1.6119	2.02382	2.55366	1.33722e-15	4.06916e-09	0.700528	0.597466	0.619118	2.5377	2.18098	2.6273	1.6119	2.02382	2.55366		0.639037	2.44866	2.06312
Glyma.13G329900		0		1.95103	2.0409	0.745193	1.66884	1.59015	4.80016	4.97352	5.90323	5.38512	4.70871	6.49552	1.22901e-07	2.02387e-08	0.745193	1.66884	1.59015	4.80016	4.97352	5.90323	5.38512	4.70871	6.49552		1.33473	5.22564	5.52978
Glyma.03G149267		0		1.95541	2.05406	0.208036	0.343981	0.53921	1.21317	1.5748	1.5155	2.05005	1.1933	1.32749	0.000468684	0.000309265	0.208036	0.343981	0.53921	1.21317	1.5748	1.5155	2.05005	1.1933	1.32749		0.363742	1.43449	1.52361
Glyma.17G158100		1-amino-cyclopropane-1-carboxylate synthase 8		1.95851	1.79992	0.040365	0.10187	0.143769	0.215444	0.438078	0.480692	0.1893	0.299644	0.523351	0.0098028	0.0302297	0.040365	0.10187	0.143769	0.215444	0.438078	0.480692	0.1893	0.299644	0.523351		0.0953347	0.378071	0.337432
Glyma.19G081500		F-box and associated interaction domains-containing protein		1.95989	1.72749	0.192577	0.456911	0.335995	1.41973	1.03931	1.40833	0.895845	1.52407	0.847294	1.56848e-06	0.000298154	0.192577	0.456911	0.335995	1.41973	1.03931	1.40833	0.895845	1.52407	0.847294		0.328494	1.28912	1.08907
Glyma.10G167100		AT-hook motif nuclear-localized protein 20		1.95996	1.36529	0.371435	0.464062	0.262568	1.84458	0.893726	1.61276	0.927112	1.02111	0.900832	9.02784e-06	0.00542957	0.371435	0.464062	0.262568	1.84458	0.893726	1.61276	0.927112	1.02111	0.900832		0.366022	1.45036	0.949685
Glyma.19G089800		chloride channel B		1.96303	1.88089	4.96933	5.18818	5.38308	20.3395	20.9341	20.4747	18.9202	18.7408	20.2606	1.55215e-138	3.2552e-122	4.96933	5.18818	5.38308	20.3395	20.9341	20.4747	18.9202	18.7408	20.2606		5.1802	20.5828	19.3072
Glyma.12G037902		Subtilase family protein		1.97038	2.26301	0.351301	0.606789	0.501199	1.95513	1.9563	1.9046	1.77476	1.70672	3.62698	9.61484e-05	2.18165e-05	0.351301	0.606789	0.501199	1.95513	1.9563	1.9046	1.77476	1.70672	3.62698		0.48643	1.93868	2.36949
Glyma.14G056300		Polyketide cyclase/dehydrase and lipid transport superfamily protein		1.97925	1.94774	4.9049	5.28916	5.94351	20.5103	22.2128	21.2605	22.0015	18.6611	21.5285	5.85419e-65	5.79777e-57	4.9049	5.28916	5.94351	20.5103	22.2128	21.2605	22.0015	18.6611	21.5285		5.37919	21.3279	20.7304
Glyma.11G003500	TSB	Pyridoxal-5\'-phosphate-dependent enzyme family protein		2.0007	1.83218	1.64112	2.3451	2.46206	8.31194	8.22271	9.40277	8.28183	7.34904	7.28595	1.80808e-33	2.08759e-27	1.64112	2.3451	2.46206	8.31194	8.22271	9.40277	8.28183	7.34904	7.28595		2.14943	8.64581	7.63894
Glyma.14G062300		Laccase/Diphenol oxidase family protein		2.01314	2.02358	0.515813	0.665489	0.671076	2.61933	2.51531	2.4106	1.83	2.61179	3.10939	1.88087e-19	1.84897e-14	0.515813	0.665489	0.671076	2.61933	2.51531	2.4106	1.83	2.61179	3.10939		0.617459	2.51508	2.51706
Glyma.03G221100		glycerol-3-phosphate acyltransferase 2		2.01901	2.29696	0.128009	0.167526	0.071674	0.326893	0.594871	0.56186	0.384062	0.790119	0.618708	0.00116215	6.4145e-05	0.128009	0.167526	0.071674	0.326893	0.594871	0.56186	0.384062	0.790119	0.618708		0.122403	0.494541	0.59763
Glyma.02G261900	PYR	PYR1-like 6	abscisic acid receptor PYL	2.01946	2.03687	0.544925	0.536711	0.896151	2.46573	2.02046	3.59402	3.07055	3.01649	2.04502	4.22587e-09	3.76762e-10	0.544925	0.536711	0.896151	2.46573	2.02046	3.59402	3.07055	3.01649	2.04502		0.659262	2.6934	2.71069
Glyma.20G028300		0		2.0205	1.84065	1.71001	1.42792	1.73414	7.72995	5.61459	6.59966	5.4797	5.03173	6.97999	8.48767e-24	4.49184e-18	1.71001	1.42792	1.73414	7.72995	5.61459	6.59966	5.4797	5.03173	6.97999		1.62402	6.64807	5.83048
Glyma.06G116400		amino acid permease 3		2.02461	2.12683	1.45121	2.47186	1.63675	7.38321	7.00412	8.35326	8.22262	8.46568	7.55901	2.71871e-25	2.43545e-30	1.45121	2.47186	1.63675	7.38321	7.00412	8.35326	8.22262	8.46568	7.55901		1.85327	7.5802	8.08244
Glyma.08G195000		Pyridoxal phosphate phosphatase-related protein		2.03389	2.07862	0.687953	1.08062	0.674234	4.22807	3.25093	2.61368	2.4552	4.05294	3.82927	3.78223e-12	2.2211e-12	0.687953	1.08062	0.674234	4.22807	3.25093	2.61368	2.4552	4.05294	3.82927		0.814269	3.36423	3.44581
Glyma.20G186200		AP2/B3 transcription factor family protein		2.03761	1.92907	0.892555	1.36585	1.37587	4.89009	4.27139	5.84082	4.28584	4.68922	4.85774	4.57786e-19	1.02443e-18	0.892555	1.36585	1.37587	4.89009	4.27139	5.84082	4.28584	4.68922	4.85774		1.21143	5.00076	4.61093
Glyma.09G063900	CKX	cytokinin oxidase 3		2.03931	2.48476	0.035725	0.127517	0.051901	0.373022	0.074316	0.437535	0.398555	0.493863	0.303212	0.0403148	0.000243538	0.035725	0.127517	0.051901	0.373022	0.074316	0.437535	0.398555	0.493863	0.303212		0.0717143	0.294958	0.398543
Glyma.13G279900		NAC domain containing protein 3		2.04843	2.07012	2.22922	2.49267	2.44478	9.35851	10.4351	10.0212	9.95033	9.3431	10.7943	2.96054e-54	2.57865e-55	2.22922	2.49267	2.44478	9.35851	10.4351	10.0212	9.95033	9.3431	10.7943		2.38889	9.93827	10.0292
Glyma.17G164200		Late embryogenesis abundant protein, group 6		2.05695	2.02015	0.155298	0.202053	0.356444	0.82252	1.03332	1.20805	1.08729	0.932625	0.953725	0.00566648	0.00760519	0.155298	0.202053	0.356444	0.82252	1.03332	1.20805	1.08729	0.932625	0.953725		0.237932	1.0213	0.991212
Glyma.12G038002		Subtilase family protein		2.07329	1.81699	0.235464	0.138835	0.071457	0.74756	0.524732	0.635726	0.22913	0.636397	0.722806	0.00114595	0.0254442	0.235464	0.138835	0.071457	0.74756	0.524732	0.635726	0.22913	0.636397	0.722806		0.148585	0.636006	0.529444
Glyma.17G079000		ABI five binding protein 3		2.08207	2.21891	0.273378	0.169526	0.177058	1.02416	0.700532	0.937264	0.884779	0.968345	1.06703	3.7282e-05	3.37066e-06	0.273378	0.169526	0.177058	1.02416	0.700532	0.937264	0.884779	0.968345	1.06703		0.206654	0.887318	0.973384
Glyma.17G067200		glutamate receptor 2.5		2.08336	2.1112	0.386303	0.576965	0.533367	2.02623	2.13188	2.24421	2.42614	2.1407	1.92363	3.96927e-14	1.0168e-13	0.386303	0.576965	0.533367	2.02623	2.13188	2.24421	2.42614	2.1407	1.92363		0.498878	2.13411	2.16349
Glyma.10G025600	protease	Eukaryotic aspartyl protease family protein		2.08542	1.83982	0.222082	0.253581	0.186841	0.711646	1.22519	0.881431	0.772228	0.595399	0.99817	8.75787e-06	0.000318338	0.222082	0.253581	0.186841	0.711646	1.22519	0.881431	0.772228	0.595399	0.99817		0.220835	0.939424	0.788599
Glyma.13G051600		cytochrome P450, family 79, subfamily B, polypeptide 2		2.09078	2.38874	0.082863	0.179829	0.22057	0.870124	0.34942	0.847916	1.00842	0.65794	0.859244	0.000398312	5.24386e-07	0.082863	0.179829	0.22057	0.870124	0.34942	0.847916	1.00842	0.65794	0.859244		0.161087	0.689153	0.841868
Glyma.17G140300		Bifunctional inhibitor/lipid-transfer protein/seed storage 2S albumin superfamily protein		2.12441	1.9222	4.0769	4.89963	4.73625	17.5183	22.4058	20.2541	17.8565	15.576	18.564	7.62998e-43	7.45559e-37	4.0769	4.89963	4.73625	17.5183	22.4058	20.2541	17.8565	15.576	18.564		4.57093	20.0594	17.3322
Glyma.09G062600	XET	xyloglucan endotransglycosylase 6		2.12469	2.12665	11.2715	12.2179	13.7264	52.1437	52.7845	58.1812	56.0883	53.7455	52.4096	3.40907e-108	1.12898e-122	11.2715	12.2179	13.7264	52.1437	52.7845	58.1812	56.0883	53.7455	52.4096		12.4053	54.3698	54.0811
Glyma.05G002700		NAC domain containing protein 44		2.14172	2.58368	0.130075	0.141098	0.230298	1.01482	0.528808	0.691704	0.808028	1.10466	1.17696	2.90768e-05	1.50496e-09	0.130075	0.141098	0.230298	1.01482	0.528808	0.691704	0.808028	1.10466	1.17696		0.167157	0.745112	1.02988
Glyma.04G049200		branched-chain amino acid transaminase 2		2.14529	2.26992	0.562321	0.348025	0.838771	1.9482	2.56922	3.64452	2.57728	2.92645	2.84358	1.89927e-11	5.87743e-16	0.562321	0.348025	0.838771	1.9482	2.56922	3.64452	2.57728	2.92645	2.84358		0.583039	2.72065	2.78244
Glyma.04G123800		alternative oxidase 1A		2.14798	2.23613	1.05749	1.60096	1.61202	5.62195	6.83995	6.55893	7.42222	7.09994	5.55967	7.74453e-33	6.87283e-34	1.05749	1.60096	1.61202	5.62195	6.83995	6.55893	7.42222	7.09994	5.55967		1.42349	6.34028	6.69394
Glyma.15G049700		nodulin MtN21 /EamA-like transporter family protein		2.15321	2.36824	0.078918	0.213301	0.192063	0.581945	0.637584	0.938135	0.785992	0.641781	1.07025	4.3895e-05	1.47496e-06	0.078918	0.213301	0.192063	0.581945	0.637584	0.938135	0.785992	0.641781	1.07025		0.161427	0.719221	0.832674
Glyma.08G194900		Pyridoxal phosphate phosphatase-related protein		2.17758	2.33857	0.087642	0.167648	0.063377	0.549274	0.453391	0.463997	0.350081	0.657722	0.610966	0.00440648	0.00212965	0.087642	0.167648	0.063377	0.549274	0.453391	0.463997	0.350081	0.657722	0.610966		0.106222	0.488887	0.53959
Glyma.08G171800		0		2.18738	1.85751	3.09933	2.9263	2.53134	12.5967	13.5247	14.7708	14.4838	13.5072	3.81289	3.39332e-100	0.0078773	3.09933	2.9263	2.53134	12.5967	13.5247	14.7708	14.4838	13.5072	3.81289		2.85232	13.6307	10.6013
Glyma.13G280000	NAP	NAC domain containing protein 2		2.19212	1.76055	0.290142	0.542294	0.283105	1.45348	1.42135	2.26996	1.44874	1.2296	1.11552	2.56458e-09	5.75489e-06	0.290142	0.542294	0.283105	1.45348	1.42135	2.26996	1.44874	1.2296	1.11552		0.371847	1.71493	1.26462
Glyma.07G136800		0		2.20176	1.91782	0.242903	0.344212	0.316834	1.31892	1.58674	1.3057	0.807355	1.41001	1.23233	4.81116e-06	0.000841918	0.242903	0.344212	0.316834	1.31892	1.58674	1.3057	0.807355	1.41001	1.23233		0.301316	1.40379	1.1499
Glyma.16G164400		Peroxidase superfamily protein		2.20816	2.24009	0.201502	0.234511	0.193814	0.88868	1.16918	0.890204	0.957423	1.22814	0.808774	5.43771e-07	7.89601e-07	0.201502	0.234511	0.193814	0.88868	1.16918	0.890204	0.957423	1.22814	0.808774		0.209942	0.982689	0.998111
Glyma.09G045600		flowering promoting factor 1		2.21153	2.58874	0.33691	0.054841	0.406222	0.852233	1.85776	1.02581	1.44987	1.91289	1.48078	0.00490783	5.95256e-05	0.33691	0.054841	0.406222	0.852233	1.85776	1.02581	1.44987	1.91289	1.48078		0.265991	1.24527	1.61451
Glyma.15G176802		Rho GTPase activation protein (RhoGAP) with PH domain		2.23519	2.75527	0.362768	0.606131	0.637985	3.03182	1.70072	3.07172	4.34695	3.22575	3.58165	0.000363692	6.56229e-08	0.362768	0.606131	0.637985	3.03182	1.70072	3.07172	4.34695	3.22575	3.58165		0.535628	2.60142	3.71812
Glyma.05G144500		response regulator 11		2.24735	2.03908	0.035763	0.17157	0.012794	0.317738	0.295837	0.504303	0.202778	0.316191	0.431458	0.0156135	0.0438915	0.035763	0.17157	0.012794	0.317738	0.295837	0.504303	0.202778	0.316191	0.431458		0.0733757	0.372626	0.316809
Glyma.08G195100		Pyridoxal phosphate phosphatase-related protein		2.25107	2.13427	0.722197	1.09767	1.04977	4.90999	4.61388	4.2417	3.3543	5.4314	3.81379	5.3591e-24	7.64513e-16	0.722197	1.09767	1.04977	4.90999	4.61388	4.2417	3.3543	5.4314	3.81379		0.956546	4.58852	4.19983
Glyma.13G246600		NAD(P)H dehydrogenase B2		2.25169	2.21147	1.75314	1.91611	1.88009	8.62362	10.375	7.62088	8.97132	8.61915	8.15158	1.15252e-53	6.31315e-69	1.75314	1.91611	1.88009	8.62362	10.375	7.62088	8.97132	8.61915	8.15158		1.84978	8.87316	8.58068
Glyma.14G048900	EFE	ethylene-forming enzyme		2.25604	2.02619	0.098123	0.177569	0.218817	0.911925	0.779559	0.703879	0.713177	0.778149	0.538796	9.07135e-05	0.00186309	0.098123	0.177569	0.218817	0.911925	0.779559	0.703879	0.713177	0.778149	0.538796		0.164836	0.798454	0.676707
Glyma.03G094700	CRP	cytokinin response factor 4		2.25622	2.03244	0.141176	0.106332	0.135143	0.768732	0.545389	0.528307	0.743201	0.491199	0.322077	0.000558828	0.00937106	0.141176	0.106332	0.135143	0.768732	0.545389	0.528307	0.743201	0.491199	0.322077		0.12755	0.614143	0.518826
Glyma.12G019900		NAD(P)-binding Rossmann-fold superfamily protein		2.26105	2.49314	0.090129	0.103966	0.098768	0.519168	0.570209	0.321725	0.556444	0.682237	0.402673	0.000496768	3.70655e-05	0.090129	0.103966	0.098768	0.519168	0.570209	0.321725	0.556444	0.682237	0.402673		0.097621	0.470367	0.547118
Glyma.08G096500		jasmonate-zim-domain protein 8		2.2614	1.95061	0.34203	0.346087	0.164437	1.65818	0.807881	1.63822	0.738974	1.42566	1.10627	0.0002839	0.00451996	0.34203	0.346087	0.164437	1.65818	0.807881	1.63822	0.738974	1.42566	1.10627		0.284185	1.36809	1.0903
Glyma.01G222200		myb domain protein 103		2.26645	2.23101	0.106411	0.148626	0.077103	0.498049	0.57926	0.526215	0.697676	0.293342	0.562758	0.000210193	0.00131276	0.106411	0.148626	0.077103	0.498049	0.57926	0.526215	0.697676	0.293342	0.562758		0.110713	0.534508	0.517925
Glyma.14G058700	2ODD	2-oxoglutarate (2OG) and Fe(II)-dependent oxygenase superfamily protein		2.27692	2.43892	0.257627	0.188581	0.417629	1.50953	1.23079	1.49528	1.22525	1.7923	1.68686	8.43854e-09	4.49534e-10	0.257627	0.188581	0.417629	1.50953	1.23079	1.49528	1.22525	1.7923	1.68686		0.287946	1.41187	1.56813
Glyma.06G104600		tetratricopeptide repeat (TPR)-containing protein		2.33483	2.36639	0.336413	0.285222	0.364612	1.62484	1.78731	1.61811	1.46299	1.67163	1.97604	1.70419e-27	1.78943e-25	0.336413	0.285222	0.364612	1.62484	1.78731	1.61811	1.46299	1.67163	1.97604		0.328749	1.67675	1.70355
Glyma.03G133300		cytokinin oxidase/dehydrogenase 1		2.33688	2.64739	0.018911	0.019167	0.081492	0.151587	0.111143	0.387132	0.398324	0.189006	0.217163	0.0286073	0.00282074	0.018911	0.019167	0.081492	0.151587	0.111143	0.387132	0.398324	0.189006	0.217163		0.0398567	0.216621	0.268164
Glyma.13G088400		tetratricopeptide repeat (TPR)-containing protein		2.35047	2.08936	0.059766	0.058155	0.096928	0.448323	0.386055	0.302484	0.279499	0.298832	0.371581	1.05997e-05	0.000399688	0.059766	0.058155	0.096928	0.448323	0.386055	0.302484	0.279499	0.298832	0.371581		0.0716163	0.378954	0.316637
Glyma.11G125500		Plant regulator RWP-RK family protein		2.35669	2.60201	0.1461	0.176437	0.093403	0.698268	0.685186	0.836079	0.860044	0.900372	0.888121	1.26977e-11	4.97884e-16	0.1461	0.176437	0.093403	0.698268	0.685186	0.836079	0.860044	0.900372	0.888121		0.138647	0.739844	0.882846
Glyma.19G002900		NAC (No Apical Meristem) domain transcriptional regulator superfamily protein		2.39968	2.51363	0.485639	0.363884	0.387448	2.77933	2.16591	1.67477	2.1708	2.54813	2.47222	1.42454e-17	1.84437e-24	0.485639	0.363884	0.387448	2.77933	2.16591	1.67477	2.1708	2.54813	2.47222		0.412324	2.20667	2.39705
Glyma.17G147500		expansin-like B1		2.40467	2.79337	0.076854	0.186662	0.046618	0.455238	0.662712	0.37485	0.903081	0.87453	0.549972	0.00142172	4.00273e-05	0.076854	0.186662	0.046618	0.455238	0.662712	0.37485	0.903081	0.87453	0.549972		0.103378	0.4976	0.775861
Glyma.06G057300		Protein kinase superfamily protein		2.40715	2.55857	0.095311	0	0.054902	0.182643	0.17709	0.435183	0.286017	0.361499	0.231362	0.039973	0.0123376	0.095311	0	0.054902	0.182643	0.17709	0.435183	0.286017	0.361499	0.231362		0.050071	0.264972	0.292959
Glyma.05G072500		Pentatricopeptide repeat (PPR) superfamily protein		2.43913	2.34802	0.023801	0.092773	0	0.196681	0.262209	0.189972	0.256709	0.219904	0.128801	0.0246696	0.0361095	0.023801	0.092773	0	0.196681	0.262209	0.189972	0.256709	0.219904	0.128801		0.038858	0.216287	0.201805
Glyma.08G269000		XH/XS domain-containing protein		2.43963	2.00722	0.109729	0.092883	0.165242	0.478889	0.675187	0.859637	0.50746	0.439633	0.535625	4.13227e-08	2.71103e-05	0.109729	0.092883	0.165242	0.478889	0.675187	0.859637	0.50746	0.439633	0.535625		0.122618	0.671238	0.494239
Glyma.14G067700		0		2.44782	3.01589	0.102409	0.208287	0.390809	1.86967	1.14733	0.972127	1.75363	1.87219	2.28213	0.00550898	1.71882e-05	0.102409	0.208287	0.390809	1.86967	1.14733	0.972127	1.75363	1.87219	2.28213		0.233835	1.32971	1.96932
Glyma.18G239000		S-adenosyl-L-methionine-dependent methyltransferases superfamily protein		2.45284	2.27884	0.037409	0.075917	0.071541	0.262432	0.527063	0.221994	0.179512	0.300199	0.414419	0.00363787	0.0108406	0.037409	0.075917	0.071541	0.262432	0.527063	0.221994	0.179512	0.300199	0.414419		0.0616223	0.337163	0.298043
Glyma.02G257700	2ODD	2-oxoglutarate (2OG) and Fe(II)-dependent oxygenase superfamily protein		2.47459	2.50915	1.51901	1.63569	1.29541	7.28805	8.82371	8.77801	8.07441	8.51244	8.75915	2.53709e-51	2.1261e-61	1.51901	1.63569	1.29541	7.28805	8.82371	8.77801	8.07441	8.51244	8.75915		1.48337	8.29659	8.44867
Glyma.18G183500		laccase 17		2.48587	2.59899	0.054212	0.03661	0.103442	0.289447	0.477335	0.329228	0.127686	0.78699	0.265704	0.000230904	0.00205969	0.054212	0.03661	0.103442	0.289447	0.477335	0.329228	0.127686	0.78699	0.265704		0.0647547	0.365337	0.39346
Glyma.20G205800		Serine protease inhibitor, potato inhibitor I-type family protein		2.53131	2.3539	1.10176	1.25301	1.632	9.46501	8.22317	5.65394	5.60808	4.84288	10.0594	3.45486e-19	1.04538e-12	1.10176	1.25301	1.632	9.46501	8.22317	5.65394	5.60808	4.84288	10.0594		1.32893	7.78071	6.8368
Glyma.15G062700		basic pathogenesis-related protein 1		2.62674	2.57268	10.983	12.1789	16.524	83.8006	83.3208	79.406	77.7699	77.2107	80.8563	5.17697e-101	3.11046e-102	10.983	12.1789	16.524	83.8006	83.3208	79.406	77.7699	77.2107	80.8563		13.2286	82.1758	78.6123
Glyma.05G162000		FASCICLIN-like arabinogalactan-protein 11		2.63477	2.4897	0.057804	0.130574	0.026508	0.4464	0.25273	0.648898	0.28858	0.49725	0.425396	0.00232382	0.00435781	0.057804	0.130574	0.026508	0.4464	0.25273	0.648898	0.28858	0.49725	0.425396		0.0716287	0.449343	0.403742
Glyma.18G033302		0		2.64366	2.61386	0.027193	0.034035	0.162052	0.571084	0.510078	0.384319	0.405027	0.463636	0.560905	0.00211619	0.00260739	0.027193	0.034035	0.162052	0.571084	0.510078	0.384319	0.405027	0.463636	0.560905		0.0744267	0.488494	0.476523
Glyma.08G070967		white-brown complex homolog protein 11		2.65195	2.07325	0.076092	0.269997	0.151776	0.957091	0.878268	1.3195	0.362763	0.841539	0.907799	7.58323e-06	0.00824993	0.076092	0.269997	0.151776	0.957091	0.878268	1.3195	0.362763	0.841539	0.907799		0.165955	1.05162	0.704034
Glyma.15G104700	protease	Eukaryotic aspartyl protease family protein		2.6847	2.81442	0.052902	0.081104	0	0.543738	0.192286	0.170755	0.366747	0.080111	0.529229	0.0306322	0.0225431	0.052902	0.081104	0	0.543738	0.192286	0.170755	0.366747	0.080111	0.529229		0.0446687	0.30226	0.325362
Glyma.09G238100		Transmembrane amino acid transporter family protein		2.69352	2.82954	1.85053	1.41519	0.723483	7.31703	8.76043	10.0717	9.35539	9.19393	9.81111	7.57928e-10	2.85561e-12	1.85053	1.41519	0.723483	7.31703	8.76043	10.0717	9.35539	9.19393	9.81111		1.32974	8.71638	9.45348
Glyma.13G152000		C-repeat-binding factor 4		2.7331	3.02915	0.155246	0.131272	0.041651	0.924903	0.492275	0.813756	0.757895	0.901855	1.05401	0.000339558	7.04128e-06	0.155246	0.131272	0.041651	0.924903	0.492275	0.813756	0.757895	0.901855	1.05401		0.10939	0.743645	0.904585
Glyma.13G226000		FASCICLIN-like arabinogalactan-protein 11		2.74124	3.38538	0	0.0843	0.026748	0.268338	0.20143	0.272457	0.429685	0.475175	0.254488	0.0336285	0.000924544	0	0.0843	0.026748	0.268338	0.20143	0.272457	0.429685	0.475175	0.254488		0.037016	0.247408	0.386449
Glyma.05G095600		Amino acid kinase family protein		2.79081	2.08045	0.171798	0.059094	0.155781	1.12972	1.04672	0.717628	0.317876	0.600444	0.817108	4.69237e-06	0.0139864	0.171798	0.059094	0.155781	1.12972	1.04672	0.717628	0.317876	0.600444	0.817108		0.128891	0.964689	0.578476
Glyma.04G220600		Peroxidase superfamily protein		2.80015	3.41898	0.090863	0	0.031206	0.293512	0.334053	0.323627	0.511868	0.43022	0.510132	0.0195891	0.000293123	0.090863	0	0.031206	0.293512	0.334053	0.323627	0.511868	0.43022	0.510132		0.0406897	0.317064	0.484073
Glyma.16G133400		XH/XS domain-containing protein		2.80199	2.40375	0.080447	0.167459	0.379497	1.39268	1.41977	1.56778	1.31944	1.17296	0.795235	5.54927e-11	5.96594e-07	0.080447	0.167459	0.379497	1.39268	1.41977	1.56778	1.31944	1.17296	0.795235		0.209134	1.46008	1.09588
Glyma.08G071033		white-brown complex homolog protein 11		2.83888	2.97833	0.136435	0.069315	0.002189	0.51351	0.478889	0.522586	0.566789	0.366065	0.744554	0.00177787	0.00088676	0.136435	0.069315	0.002189	0.51351	0.478889	0.522586	0.566789	0.366065	0.744554		0.069313	0.504995	0.559136
Glyma.17G067301		glutamate receptor 2.8		2.83997	2.62018	0.080772	0.154356	0.028093	0.625604	0.795353	0.841059	1.05975	0.522869	0.444283	1.426e-05	0.000414321	0.080772	0.154356	0.028093	0.625604	0.795353	0.841059	1.05975	0.522869	0.444283		0.0877403	0.754005	0.675633
Glyma.10G245100		Leucine-rich repeat (LRR) family protein		2.85381	3.02446	0.367071	0.384056	0.539175	2.94665	3.81889	2.64691	2.77103	3.16032	4.61438	2.62838e-26	3.31366e-28	0.367071	0.384056	0.539175	2.94665	3.81889	2.64691	2.77103	3.16032	4.61438		0.430101	3.13748	3.51525
Glyma.11G171400		glutamine-dependent asparagine synthase 1		2.87991	2.83325	3.635	3.8577	3.26513	25.7227	28.4631	26.7336	28.6429	24.9336	23.8032	1.04056e-208	3.53427e-175	3.635	3.8577	3.26513	25.7227	28.4631	26.7336	28.6429	24.9336	23.8032		3.58594	26.9731	25.7932
Glyma.11G154500		RNA polymerase II fifth largest subunit, E		2.91518	2.64866	0.040076	0	0.154872	0.47046	0.540322	0.469367	0.243501	0.68409	0.295874	0.00939694	0.04481	0.040076	0	0.154872	0.47046	0.540322	0.469367	0.243501	0.68409	0.295874		0.0649827	0.493383	0.407822
Glyma.13G320600		GDSL-like Lipase/Acylhydrolase superfamily protein		2.92102	2.59806	0.085253	0.028419	0.027294	0.556436	0.255122	0.312421	0.285662	0.19545	0.410369	0.00093038	0.00881247	0.085253	0.028419	0.027294	0.556436	0.255122	0.312421	0.285662	0.19545	0.410369		0.0469887	0.37466	0.29716
Glyma.09G281900		O-methyltransferase 1		2.93066	2.66392	0.027444	0	0.10579	0.440278	0.340064	0.246386	0.373143	0.220262	0.246977	0.0097748	0.0336455	0.027444	0	0.10579	0.440278	0.340064	0.246386	0.373143	0.220262	0.246977		0.0444113	0.342243	0.280127
Glyma.13G075900		PLAT/LH2 domain-containing lipoxygenase family protein		2.94146	2.75826	0	0.054795	0.025681	0.306823	0.259898	0.054094	0.163736	0.233062	0.145835	0.010768	0.00928891	0	0.054795	0.025681	0.306823	0.259898	0.054094	0.163736	0.233062	0.145835		0.0268253	0.206938	0.180878
Glyma.05G192300		0		3.01178	3.21181	0	0.041947	0.065388	0.202923	0.403304	0.291146	0.082982	0.500785	0.447636	0.00274075	0.00272635	0	0.041947	0.065388	0.202923	0.403304	0.291146	0.082982	0.500785	0.447636		0.0357783	0.299124	0.343801
Glyma.19G014600		cytochrome P450, family 82, subfamily C, polypeptide 4		3.05185	2.63716	0.261899	0.099784	0.21009	1.69711	1.54315	1.53377	1.24387	1.2144	1.09914	2.32715e-17	7.31226e-11	0.261899	0.099784	0.21009	1.69711	1.54315	1.53377	1.24387	1.2144	1.09914		0.190591	1.59135	1.1858
Glyma.17G159600		VQ motif-containing protein		3.08272	3.48996	0.429556	0.286067	0.139111	2.63774	1.9195	2.76905	3.18178	2.9822	3.49411	6.71195e-12	9.30945e-19	0.429556	0.286067	0.139111	2.63774	1.9195	2.76905	3.18178	2.9822	3.49411		0.284911	2.4421	3.21936
Glyma.15G067300		NAD(P)H dehydrogenase B2		3.09299	3.12841	0.143249	0.20692	0.137126	1.3815	1.44204	1.36998	1.40134	1.25683	1.61663	1.35147e-23	5.28507e-23	0.143249	0.20692	0.137126	1.3815	1.44204	1.36998	1.40134	1.25683	1.61663		0.162432	1.39784	1.42493
Glyma.12G221500		NAC (No Apical Meristem) domain transcriptional regulator superfamily protein		3.10714	3.13988	0.96062	0.895065	1.60964	10.0613	10.4789	9.70984	10.5695	10.1031	10.0703	1.33982e-57	2.3924e-61	0.96062	0.895065	1.60964	10.0613	10.4789	9.70984	10.5695	10.1031	10.0703		1.15511	10.0833	10.2476
Glyma.18G042400		gamete expressed protein 1		3.21496	3.06734	0.038688	0.059347	0.018767	0.367784	0.379893	0.336713	0.549681	0.243544	0.176126	3.39757e-06	0.000232464	0.038688	0.059347	0.018767	0.367784	0.379893	0.336713	0.549681	0.243544	0.176126		0.038934	0.361463	0.323117
Glyma.01G244066		Plant basic secretory protein (BSP) family protein		3.3067	3.29559	0.039097	0.009114	0.025535	0.19873	0.387596	0.161432	0.15271	0.296304	0.290555	0.0125735	0.0131713	0.039097	0.009114	0.025535	0.19873	0.387596	0.161432	0.15271	0.296304	0.290555		0.024582	0.249253	0.246523
Glyma.01G046300		UDP-glucosyl transferase 73B5		3.31727	3.67808	0.023703	0.071912	0	0.31993	0.510986	0.176384	0.15143	0.46004	0.673356	0.00157723	0.000164486	0.023703	0.071912	0	0.31993	0.510986	0.176384	0.15143	0.46004	0.673356		0.0318717	0.335767	0.428275
Glyma.03G145600		peroxidase 2		3.33742	3.04372	0.297024	0.093544	0.177684	2.14296	1.94051	1.80235	1.57461	1.6112	1.5776	1.04774e-16	1.96867e-12	0.297024	0.093544	0.177684	2.14296	1.94051	1.80235	1.57461	1.6112	1.5776		0.189417	1.96194	1.5878
Glyma.12G100600		Homeodomain-like superfamily protein		3.358	3.2801	1.03862	1.33851	1.6058	15.6397	13.9583	11.6282	10.4864	14.0148	14.2801	4.74157e-64	2.89275e-57	1.03862	1.33851	1.6058	15.6397	13.9583	11.6282	10.4864	14.0148	14.2801		1.32764	13.7421	12.9271
Glyma.19G026100		SNF1 kinase homolog 10		3.43206	3.31553	0.048411	0	0.028203	0.259522	0.107039	0.545013	0.325556	0.205218	0.308757	0.0263516	0.0279105	0.048411	0	0.028203	0.259522	0.107039	0.545013	0.325556	0.205218	0.308757		0.025538	0.303858	0.279844
Glyma.15G071200		0		3.4345	3.294	0.105151	0.047279	0.014984	0.760279	0.714954	0.341316	0.696427	0.373026	0.561561	2.55103e-08	7.90532e-08	0.105151	0.047279	0.014984	0.760279	0.714954	0.341316	0.696427	0.373026	0.561561		0.0558047	0.605516	0.543671
Glyma.03G173700		Plant protein 1589 of unknown function		3.51033	3.54148	0.136249	0.025612	0.161781	1.28266	1.34449	1.15371	0.849629	1.10903	1.90432	1.65164e-07	7.56107e-07	0.136249	0.025612	0.161781	1.28266	1.34449	1.15371	0.849629	1.10903	1.90432		0.107881	1.26029	1.28766
Glyma.14G145900		Regulator of chromosome condensation (RCC1) family protein		3.54458	3.73012	0.057763	0	0	0.287894	0.102515	0.292925	0.272883	0.358266	0.123297	0.00986295	0.00293629	0.057763	0	0	0.287894	0.102515	0.292925	0.272883	0.358266	0.123297		0.0192543	0.227778	0.251482
Glyma.02G000800		basic helix-loop-helix (bHLH) DNA-binding superfamily protein		3.58887	3.39148	0.06377	0	0	0.238451	0.419664	0.126762	0.143091	0.282395	0.339169	0.0206259	0.036376	0.06377	0	0	0.238451	0.419664	0.126762	0.143091	0.282395	0.339169		0.0212567	0.261626	0.254885
Glyma.05G039200		0		3.59889	3.42909	0	0	0.05188	0.128063	0.074679	0.428316	0.245807	0.096485	0.219869	0.0245336	0.027179	0	0	0.05188	0.128063	0.074679	0.428316	0.245807	0.096485	0.219869		0.0172933	0.210353	0.187387
Glyma.01G217600		osmotin 34		3.6146	4.17635	0	0.032022	0.090325	0.608857	0.634954	0.285122	0.775739	0.331005	1.13462	0.000181573	9.13267e-07	0	0.032022	0.090325	0.608857	0.634954	0.285122	0.775739	0.331005	1.13462		0.0407823	0.509644	0.74712
Glyma.20G149500		Leucine-rich repeat (LRR) family protein		3.65253	3.31388	0.027297	0.073125	0.02507	0.439682	0.592792	0.605247	0.166968	0.541492	0.586204	2.59919e-07	0.000176862	0.027297	0.073125	0.02507	0.439682	0.592792	0.605247	0.166968	0.541492	0.586204		0.0418307	0.545907	0.431555
Glyma.08G119600		FASCICLIN-like arabinogalactan-protein 11		3.66931	3.82772	0.030326	0.032022	0	0.169252	0.437519	0.18994	0.031994	0.474133	0.381384	0.00361094	0.00546946	0.030326	0.032022	0	0.169252	0.437519	0.18994	0.031994	0.474133	0.381384		0.0207827	0.26557	0.295837
Glyma.17G181200		ribosomal RNA processing 4		3.77323	3.50658	0.171522	0.089692	0	2.01229	1.09532	1.25427	1.19412	0.758483	1.65217	0.00137656	0.00798022	0.171522	0.089692	0	2.01229	1.09532	1.25427	1.19412	0.758483	1.65217		0.0870713	1.45396	1.20159
Glyma.06G273600		Cysteine proteinases superfamily protein		3.88417	3.71971	0	0.052052	0	0.157982	0.466127	0.14781	0.149416	0.207339	0.330129	0.0091559	0.0135788	0	0.052052	0	0.157982	0.466127	0.14781	0.149416	0.207339	0.330129		0.0173507	0.257306	0.228961
Glyma.05G234500		BR enhanced expression 1		3.92979	3.44404	0.06924	0.052634	0	0.606779	0.904657	0.464137	0.330423	0.483958	0.595991	2.83748e-06	0.000410236	0.06924	0.052634	0	0.606779	0.904657	0.464137	0.330423	0.483958	0.595991		0.0406247	0.658524	0.470124
Glyma.08G235300		Kunitz family trypsin and protease inhibitor protein		3.93802	3.79828	0	0	0.071622	0.357867	0.422037	0.331313	0.4042	0.33576	0.264549	0.00245388	0.00566023	0	0	0.071622	0.357867	0.422037	0.331313	0.4042	0.33576	0.264549		0.023874	0.370406	0.334836
Glyma.15G223900		12-oxophytodienoate reductase 2		4.05927	5.41279	0.029031	0	0	0.058384	0.201985	0.216708	0.292606	0.260991	0.674896	0.0239234	5.62006e-06	0.029031	0	0	0.058384	0.201985	0.216708	0.292606	0.260991	0.674896		0.009677	0.159026	0.409498
Glyma.07G218500		winged-helix DNA-binding transcription factor family protein		4.16196	3.4124	0.031279	0.04721	0	0.489544	0.38556	0.527845	0.384672	0.28465	0.158295	1.25624e-09	0.000190264	0.031279	0.04721	0	0.489544	0.38556	0.527845	0.384672	0.28465	0.158295		0.026163	0.46765	0.275872
Glyma.09G220800	SAUR	SAUR-like auxin-responsive protein family		4.16821	3.66537	0	0	0.037044	0.074431	0.248003	0.434487	0.24493	0.070131	0.204821	0.0101772	0.0488024	0	0	0.037044	0.074431	0.248003	0.434487	0.24493	0.070131	0.204821		0.012348	0.252307	0.173294
Glyma.03G052151		0		4.32534	4.27706	0.173164	0.214257	0.206546	4.55147	4.26147	3.41091	3.66269	3.7104	4.37074	1.2798e-49	7.4924e-49	0.173164	0.214257	0.206546	4.55147	4.26147	3.41091	3.66269	3.7104	4.37074		0.197989	4.07461	3.91461
Glyma.14G167800		0		4.53184	4.48676	0.146181	0	0.070555	2.36746	2.11367	0.579913	0.776364	1.91457	2.18973	2.61884e-07	8.72294e-08	0.146181	0	0.070555	2.36746	2.11367	0.579913	0.776364	1.91457	2.18973		0.0722453	1.68701	1.62689
Glyma.18G294300		Class I glutamine amidotransferase-like superfamily protein		4.61704	5.32085	0	0	0.007849	0.083248	0.046284	0.114213	0.090475	0.212708	0.091853	0.000421657	1.23819e-06	0	0	0.007849	0.083248	0.046284	0.114213	0.090475	0.212708	0.091853		0.00261633	0.0812483	0.131679
Glyma.12G068900		FASCICLIN-like arabinogalactan-protein 11		4.65608	4.90952	0	0.037955	0	0.279653	0.522781	0.373013	0.376942	0.448136	0.577855	0.000227384	2.35267e-05	0	0.037955	0	0.279653	0.522781	0.373013	0.376942	0.448136	0.577855		0.0126517	0.391816	0.467644
Glyma.11G025600		osmotin 34		4.7325	4.76454	0	0	0.02988	0.382658	0.232239	0.197069	0.200553	0.322337	0.295805	3.56779e-05	2.15876e-05	0	0	0.02988	0.382658	0.232239	0.197069	0.200553	0.322337	0.295805		0.00996	0.270655	0.272898
Glyma.05G161900		FASCICLIN-like arabinogalactan-protein 12		4.78143	4.74301	0.036056	0.109147	0	0.880677	1.92792	1.16024	1.48533	1.3771	0.972506	8.99074e-12	1.48777e-12	0.036056	0.109147	0	0.880677	1.92792	1.16024	1.48533	1.3771	0.972506		0.048401	1.32295	1.27831
Glyma.05G186400		0		4.85421	5.39886	0	0	0.054073	0.498776	0.692755	0.393614	0.505698	1.22794	0.567359	0.000272878	6.47462e-06	0	0	0.054073	0.498776	0.692755	0.393614	0.505698	1.22794	0.567359		0.0180243	0.528382	0.767
Glyma.19G148800	POD	peroxidase 2		5.02135	4.71641	0.029482	0.029881	0.028316	0.86261	0.75315	1.23076	0.524486	0.867065	0.900102	4.17083e-15	5.64353e-12	0.029482	0.029881	0.028316	0.86261	0.75315	1.23076	0.524486	0.867065	0.900102		0.0292263	0.948841	0.763884
Glyma.19G015000	CYP450	cytochrome P450, family 82, subfamily C, polypeptide 4		5.26761	5.58155	0	0.023648	0	0.174906	0.46585	0.25659	0.443797	0.368739	0.293043	1.71005e-05	4.08136e-07	0	0.023648	0	0.174906	0.46585	0.25659	0.443797	0.368739	0.293043		0.00788267	0.299115	0.368526
Glyma.01G042600		SPFH/Band 7/PHB domain-containing membrane-associated protein family		5.90545	5.63963	0	0	0	0.081258	0.026068	0.10056	0.044216	0.101293	0.025774	0.0220592	0.0478248	0	0	0	0.081258	0.026068	0.10056	0.044216	0.101293	0.025774		0	0.0692953	0.0570943
Glyma.09G010400		0		5.91134	6.08619	0	0	0	0.060058	0.114393	0.055759	0	0.062351	0.197869	0.0194317	0.0354017	0	0	0	0.060058	0.114393	0.055759	0	0.062351	0.197869		0	0.0767367	0.08674
Glyma.18G052200		cytochrome P450, family 79, subfamily B, polypeptide 2		5.96307	5.68874	0	0	0	0.137546	0.071818	0.050481	0.025768	0.099868	0.086512	0.0168431	0.040743	0	0	0	0.137546	0.071818	0.050481	0.025768	0.099868	0.086512		0	0.086615	0.070716
Glyma.20G221700		RmlC-like cupins superfamily protein		6.03556	7.01099	0	0	0	0.105313	0.152542	0.172381	0.049602	0.752021	0.049994	0.0120498	0.00100668	0	0	0	0.105313	0.152542	0.172381	0.049602	0.752021	0.049994		0	0.143412	0.283872
Glyma.13G032000		Protein kinase superfamily protein		6.21625	6.09354	0	0	0	0.041236	0.020066	0.136292	0.039368	0.09691	0.039151	0.00989864	0.0116346	0	0	0	0.041236	0.020066	0.136292	0.039368	0.09691	0.039151		0	0.0658647	0.0584763
Glyma.09G131700		0		6.21713	5.80592	0.097592	0	0	3.19793	2.02766	2.46724	0.949933	2.75688	2.03021	0.00745759	0.0193329	0.097592	0	0	3.19793	2.02766	2.46724	0.949933	2.75688	2.03021		0.0325307	2.56428	1.91234
Glyma.15G174833		zinc finger WD40 repeat protein 1		6.23039	5.92609	0	0	0	0.038538	0.09317	0.0512	0.018243	0.070934	0.054793	0.00646759	0.0206214	0	0	0	0.038538	0.09317	0.0512	0.018243	0.070934	0.054793		0	0.0609693	0.04799
Glyma.15G175100		zinc finger WD40 repeat protein 1		6.23374	6.52889	0	0	0	0.099527	0.018998	0.074844	0.063167	0.131033	0.03795	0.00795389	0.00231962	0	0	0	0.099527	0.018998	0.074844	0.063167	0.131033	0.03795		0	0.0644563	0.0773833
Glyma.15G134300		FAD-binding Berberine family protein		6.27114	5.73817	0	0	0	0.091192	0.066044	0.061756	0.021547	0.042676	0.086581	0.00498718	0.0371333	0	0	0	0.091192	0.066044	0.061756	0.021547	0.042676	0.086581		0	0.0729973	0.050268
Glyma.13G081100		nodulin MtN21 /EamA-like transporter family protein		6.29317	6.12662	0	0	0	0	0.295141	0.170471	0	0.240756	0.177198	0.0208266	0.0300676	0	0	0	0	0.295141	0.170471	0	0.240756	0.177198		0	0.155204	0.139318
Glyma.17G171600		phytochrome and flowering time regulatory protein (PFT1)		6.75152	5.83848	0	0	0	0.105896	0.027566	0.348829	0.050323	0.160069	0.026849	0.00155223	0.0297423	0	0	0	0.105896	0.027566	0.348829	0.050323	0.160069	0.026849		0	0.160764	0.0790803
Glyma.11G162700		Pentatricopeptide repeat (PPR) superfamily protein		6.76974	5.92343	0	0	0	0.09403	0.054052	0.075199	0	0.075605	0.045838	0.00054365	0.0492633	0	0	0	0.09403	0.054052	0.075199	0	0.075605	0.045838		0	0.074427	0.040481
Glyma.03G106200		mitogen-activated protein kinase kinase kinase 19		6.8571	6.40733	0	0	0	0.40325	0.187538	0.040064	0.113425	0.185901	0.151953	0.000891094	0.00310114	0	0	0	0.40325	0.187538	0.040064	0.113425	0.185901	0.151953		0	0.210284	0.150426
Glyma.01G041100		thioredoxin 2		7.35478	7.34137	0	0	0	0.337884	0.563702	0.292745	0.274462	0.261345	0.660193	2.2479e-05	3.36524e-05	0	0	0	0.337884	0.563702	0.292745	0.274462	0.261345	0.660193		0	0.39811	0.398667
Glyma.16G119900		Cytidine/deoxycytidylate deaminase family protein		7.51525	7.56922	0	0	0	0.328013	0.1504	0.184774	0.173693	0.175019	0.33443	9.23879e-06	6.82686e-06	0	0	0	0.328013	0.1504	0.184774	0.173693	0.175019	0.33443		0	0.221062	0.227714
Glyma.08G211000		0		7.792	7.84479	0	0	0	0.35322	1.20085	0.515213	0.261341	0.314967	1.59461	2.60078e-06	5.07976e-06	0	0	0	0.35322	1.20085	0.515213	0.261341	0.314967	1.59461		0	0.689762	0.72364
Glyma.14G148100		nodulin MtN21 /EamA-like transporter family protein		7.80145	8.18006	0	0	0	0.220084	0.300105	0.313995	0.330443	0.566802	0.180146	1.10151e-06	1.77475e-07	0	0	0	0.220084	0.300105	0.313995	0.330443	0.566802	0.180146		0	0.278061	0.35913
Glyma.10G184600		Serine protease inhibitor, potato inhibitor I-type family protein		8.22574	8.34157	0	0	0	1.20531	0.875871	0.859257	0.696655	0.884167	1.57994	5.42527e-08	3.83013e-08	0	0	0	1.20531	0.875871	0.859257	0.696655	0.884167	1.57994		0	0.980144	1.05359
Glyma.18G155550		NADH dehydrogenase family protein	NAD(P)H-quinone oxidoreductase subunit 1, chloroplastic	8.2416	7.97086	0	0	0	0.31222	0.335757	0.28586	0.184089	0.322427	0.264652	4.43803e-08	4.08357e-07	0	0	0	0.31222	0.335757	0.28586	0.184089	0.322427	0.264652		0	0.311279	0.257056
Glyma.08G341400	protease inhibitor	Kunitz family trypsin and protease inhibitor protein		8.40874	8.10286	0	0	0	0.790328	0.624268	0.36047	0.401097	0.445791	0.575618	2.09631e-08	1.45288e-07	0	0	0	0.790328	0.624268	0.36047	0.401097	0.445791	0.575618		0	0.591689	0.474169
Glyma.05G079651	PK	Pyruvate kinase family protein		8.82056	8.70341	0	0	0	0.841471	0.876441	0.551713	0.570753	0.550483	0.961368	6.97716e-10	2.12365e-09	0	0	0	0.841471	0.876441	0.551713	0.570753	0.550483	0.961368		0	0.756542	0.694201
Glyma.03G073778		laccase 7		9.52141	9.67876	0	0	0	0.545371	0.608959	0.514801	0.569973	0.611512	0.671529	2.21044e-12	6.4222e-13	0	0	0	0.545371	0.608959	0.514801	0.569973	0.611512	0.671529		0	0.556377	0.617671
Glyma.13G278000		low-molecular-weight cysteine-rich 68		10.4538	10.1813	0	0	0	4.48872	6.83587	4.31608	4.03169	3.87884	4.93348	1.61343e-15	1.06139e-14	0	0	0	4.48872	6.83587	4.31608	4.03169	3.87884	4.93348		0	5.21356	4.28134

## Sheet: FPKM>1
Supplementary Table S3. 552 DEGs in gmfbac1gmfbac2 vs wild type
Gene ID	annotation	log2FC (gmfbac1gmfbac2-1 vs WT)	log2FC (gmfbac1gmfbac2-2 vs WT)	WT-rep1	WT-rep2	WT-rep3	gmfbac1gmfbac2-1-rep1	gmfbac1gmfbac2-1-rep2	gmfbac1gmfbac2-1-rep3	gmfbac1gmfbac2-2-rep1	gmfbac1gmfbac2-2-rep2	gmfbac1gmfbac2-2-rep3	FDR (gmfbac1gmfbac2-1 vs WT)	FDR (gmfbac1gmfbac2-2 vs WT)
Glyma.16G170900	disease resistance family protein / LRR family protein	-11.2247	-11.2499	1.16249	1.16689	1.35965	0	0	0	0	0	0	1.38182e-18	1.09724e-18
Glyma.02G211100	#REF!	-4.34674	-5.02113	2.46961	0.105955	3.91373	0.089029	0.071045	0.128462	0.054513	0.046315	0.058566	7.67078e-05	1.05409e-05
Glyma.04G022620	SIGNAL PEPTIDE PEPTIDASE-LIKE 2	-4.28117	-3.5652	1.40213	1.1299	0.940041	0	0.10924	0.066677	0.050596	0.145335	0.084522	3.50323e-11	1.20798e-11
Glyma.20G076400	#REF!	-3.73928	-3.65701	3.15245	1.94407	2.47313	0.211967	0.114779	0.081164	0.181256	0.176176	0.025402	7.45826e-14	8.42266e-14
Glyma.10G278000	fatty acid desaturase 2	-3.60114	-2.68725	1.03849	1.27727	1.3168	0.130197	0.091871	0.066508	0.223655	0.177972	0.135194	2.09324e-18	2.08093e-12
Glyma.20G041100	zinc ion binding	-3.45485	-3.42531	1.23993	1.51789	1.06757	0.087749	0.124083	0.130918	0.101766	0.156397	0.09237	1.31079e-24	5.39331e-23
Glyma.19G231100	#REF!	-3.31264	-3.58187	67.6476	64.9086	111.738	7.4282	9.15878	8.01179	6.56419	6.73299	6.93343	9.76138e-51	1.0659e-60
Glyma.13G095200	xyloglucan endotransglycosylase 6	-3.29414	-2.86043	3.86922	4.48909	3.80471	0.260637	0.2877	0.682525	0.475387	0.556391	0.630467	1.9217e-22	2.08704e-30
Glyma.09G009700	Protein of unknown function (DUF506)	-3.22687	-3.38388	3.1389	2.79875	3.03457	0.320583	0.36418	0.270218	0.231431	0.387526	0.232483	3.48917e-41	4.99904e-37
Glyma.10G236000	CAP160 protein	-3.19567	-2.68426	1.57787	1.26656	1.67096	0.100164	0.145166	0.23916	0.221964	0.238941	0.230257	1.44423e-16	5.72384e-16
Glyma.01G204800	expansin-like B1	-3.08731	-3.15598	1.13157	0.834757	1.32143	0.244549	0.058039	0.07482	0.167204	0.075048	0.114003	4.947e-07	7.85674e-09
Glyma.01G055700	HCO3- transporter family	-2.89861	-3.00955	7.14251	4.11144	11.0422	1.99372	0.939589	0.095407	0.971545	0.979395	0.57461	2.07689e-05	1.39648e-09
Glyma.03G233900	phloem protein 2-B2	-2.85726	-2.92316	2.91343	1.95591	4.46105	0.46933	0.270596	0.582041	0.389134	0.578688	0.261739	2.45988e-11	4.66935e-12
Glyma.06G234500	RING/U-box superfamily protein	-2.80088	-2.49595	1.44731	1.51502	2.44957	0.174867	0.424111	0.175673	0.45772	0.246579	0.239648	6.82553e-12	1.23912e-11
Glyma.01G011500	Mono-/di-acylglycerol lipase, N-terminal;Lipase, class 3	-2.76155	-2.86452	2.79579	3.5531	3.79928	0.45391	0.499319	0.545825	0.266582	0.53291	0.581668	1.01007e-36	5.42733e-27
Glyma.02G114100	#REF!	-2.75306	-2.6215	15.792	15.2633	22.6873	3.34618	2.55136	2.15422	3.46094	2.77893	2.44132	5.55643e-45	7.59724e-45
Glyma.12G063900	WUSCHEL related homeobox 2	-2.69635	-2.33335	1.43567	1.86499	1.60042	0.202765	0.245124	0.307738	0.27484	0.333447	0.361033	1.42767e-16	8.26665e-14
Glyma.13G095000	Xyloglucan endotransglucosylase/hydrolase family protein	-2.65277	-2.62164	21.3261	21.1952	19.1638	3.12792	3.94907	2.77341	2.15052	3.31465	4.55301	3.78068e-83	6.11903e-46
Glyma.19G147200	Late Embryogenesis Abundant 4-5	-2.63699	-2.98854	1.33232	2.01794	2.01046	0.384128	0.247453	0.239009	0.145191	0.288041	0.243192	7.43708e-09	4.2395e-10
Glyma.06G021200	DC1 domain-containing protein	-2.6092	-2.64632	26.4411	25.5927	27.5366	4.04734	3.99618	4.51195	4.30401	3.88817	4.33978	1.77445e-176	1.93846e-186
Glyma.08G281600	arabinogalactan protein 3	-2.51776	-2.45566	46.8473	45.2198	47.7967	6.87514	8.44077	9.17383	8.69458	7.30529	9.46353	6.21545e-108	1.41148e-123
Glyma.09G185500	#REF!	-2.50852	-2.28373	10.7866	11.2941	10.6732	1.8275	2.36363	1.59183	1.5352	2.25996	2.92299	5.69773e-51	3.16896e-32
Glyma.02G177800	myb-like HTH transcriptional regulator family protein	-2.49975	-1.92506	1.92541	2.59524	3.04348	0.462505	0.565277	0.140238	0.706614	0.709359	0.336093	1.22102e-08	7.66786e-08
Glyma.02G142100	alpha/beta-Hydrolases superfamily protein	-2.49753	-2.25186	6.55498	6.64228	5.5539	1.1257	1.24058	0.966234	1.49182	1.14235	1.28713	6.28777e-50	1.50763e-40
Glyma.10G015000	#REF!	-2.37678	-2.15449	2.30575	3.87241	4.096	0.46296	0.82241	0.689305	0.681743	1.07615	0.524386	2.08282e-11	4.85929e-09
Glyma.08G346100	Protein of unknown function (DUF506)	-2.31547	-2.1187	1.30478	1.40663	1.09491	0.440976	0.150524	0.172015	0.518784	0.234802	0.118644	1.88886e-06	7.12692e-05
Glyma.15G262800	zinc transporter 1 precursor	-2.30567	-1.95472	3.78391	3.53645	4.159	0.80436	0.680213	0.836722	0.894954	1.2988	0.752989	2.97794e-25	1.24595e-14
Glyma.20G063100	zinc transporter 1 precursor	-2.2256	-2.0543	6.52788	7.52348	8.87019	1.76108	1.90864	1.25147	2.21589	1.6975	1.58245	7.27436e-31	1.83542e-28
Glyma.17G065400	xyloglucan endotransglycosylase 6	-2.22334	-2.24777	3.69706	4.09625	3.86752	0.874128	0.747602	0.879968	0.825884	0.87145	0.745765	1.98788e-20	3.7133e-20
Glyma.20G158500	CAP160 protein	-2.21623	-2.3875	2.30647	2.21882	2.75734	0.610352	0.569333	0.383952	0.564552	0.536421	0.269833	9.6796e-18	9.70322e-16
Glyma.12G076800	cyclic nucleotide-gated channel 15	-2.20576	-2.3918	4.60923	3.82966	4.61172	0.697472	0.997509	1.13902	0.752925	0.836594	0.889011	1.35234e-29	6.53635e-49
Glyma.17G065100	xyloglucan endotransglycosylase 6	-2.17823	-2.11281	13.6058	13.488	11.9358	2.88037	2.94253	2.83252	2.81872	2.65745	3.53152	3.08925e-62	4.10401e-48
Glyma.01G151300	Major facilitator superfamily protein	-2.14935	-1.11881	1.00536	1.15993	1.04329	0.193593	0.261985	0.262238	0.685009	0.476389	0.305826	6.53386e-11	0.00593877
Glyma.17G203400	Histone superfamily protein	-2.12787	-2.6297	1.57522	2.23267	0.870297	0.379743	0.487011	0.197084	0.268927	0.261641	0.198621	0.000821575	1.32598e-05
Glyma.06G088100	HPT phosphotransmitter 4	-2.10911	-2.73228	0.925756	0.615965	1.96289	0.374069	0.314013	0.107485	0	0.225257	0.283103	0.0310109	0.0172563
Glyma.19G188700	poly(A) binding protein 7	-2.09111	-1.67574	1.47394	1.56569	1.22125	0.198999	0.452095	0.321499	0.411685	0.466	0.421287	2.38129e-10	3.37374e-10
Glyma.18G003200	xyloglucan endotransglucosylase/hydrolase 16	-2.04684	-1.87436	17.7794	17.0203	17.7884	4.67232	4.05461	4.06176	4.37603	4.74155	5.19513	5.15561e-70	4.26657e-59
Glyma.20G192700	cycloartenol synthase 1	-2.03354	-1.46564	2.41165	1.79964	3.08228	0.615518	0.545113	0.608873	0.692016	1.06072	0.879018	1.0715e-17	1.00507e-08
Glyma.10G072000	#REF!	-1.9742	-2.04475	3.17933	2.98423	4.48636	1.39668	0.60446	0.726613	0.680684	1.1112	0.768018	1.30743e-07	5.3634e-10
Glyma.02G233300	#REF!	-1.94509	-1.62708	12.2005	10.9593	15.697	3.35046	3.2658	3.52021	3.67609	4.60766	4.27305	8.0144e-47	1.10874e-31
Glyma.13G004400	zinc transporter 5 precursor	-1.92657	-1.66931	9.71451	10.3035	9.82012	2.12329	2.01827	3.73758	2.87986	3.10501	3.10082	1.84033e-06	1.02857e-46
Glyma.13G052100	AGAMOUS-like 8	-1.90919	-2.08867	1.15018	0.860084	1.49989	0.347658	0.381439	0.211	0.280904	0.165434	0.370332	1.22766e-06	3.7243e-07
Glyma.11G060500	#REF!	-1.89881	-1.4972	2.58009	2.09501	3.69235	0.890944	0.290748	1.05775	1.34256	1.01438	0.556048	0.000573957	0.00301078
Glyma.18G246100	basic helix-loop-helix (bHLH) DNA-binding superfamily protein	-1.88571	-2.04419	9.74702	10.025	13.5848	3.68791	2.71287	2.6776	2.14977	2.9996	2.92165	6.97139e-26	1.45043e-30
Glyma.11G253900	xyloglucan endotransglucosylase/hydrolase 16	-1.87259	-2.02387	22.1096	20.964	23.307	5.68676	5.34837	7.15761	5.60637	5.21519	5.46058	6.42961e-46	4.37859e-77
Glyma.01G129200	#REF!	-1.85878	-2.48008	3.7366	3.40033	5.5097	1.35421	1.22709	0.915287	0.809159	0.889559	0.557063	2.00363e-10	4.93188e-16
Glyma.08G127600	RmlC-like cupins superfamily protein	-1.85718	-1.49805	7.50432	10.6265	9.00197	2.22661	2.49885	2.78547	3.45762	2.42935	3.70355	3.23914e-26	4.38315e-15
Glyma.14G119732	#REF!	-1.84501	-2.32897	0.541647	1.46669	1.52982	0.442972	0.270107	0.263098	0.442065	0.182621	0.067142	0.000307078	0.00026101
Glyma.19G228400	nicotianamine synthase 2	-1.83526	-1.66412	6.87663	7.86228	8.18708	1.72479	2.61046	2.1093	3.03479	1.66285	2.5135	1.94682e-22	2.98013e-15
Glyma.16G175900	UDP-glucosyl transferase 88A1	-1.82826	-1.61784	1.14798	1.23538	1.09421	0.255875	0.536908	0.188976	0.329127	0.415861	0.375583	8.85061e-05	9.43766e-06
Glyma.04G251100	nodulin MtN21 /EamA-like transporter family protein	-1.82759	-1.3793	2.90387	2.51288	2.53407	1.01532	0.336435	0.900718	1.06544	0.873907	1.10438	2.84277e-07	4.05925e-09
Glyma.06G035300	cytochrome P450, family 82, subfamily C, polypeptide 4	-1.82568	-1.88777	3.07234	3.29227	2.7324	0.703327	0.928068	0.936591	0.741669	0.830027	0.874886	1.41619e-17	1.63014e-20
Glyma.15G138000	#REF!	-1.81781	-1.89312	3.65954	3.51481	3.12529	0.98696	1.10764	0.838963	1.11158	0.827618	0.815673	2.59986e-13	3.11589e-13
Glyma.06G250300	Developmental regulator, ULTRAPETALA	-1.79998	-1.33569	1.57086	0.556892	1.13435	0.248434	0.255697	0.415288	0.355641	0.466274	0.471861	0.00161016	0.0204279
Glyma.12G223100	Seven transmembrane MLO family protein	-1.78736	-2.20146	1.3795	1.16561	0.996498	0.282988	0.3601	0.384245	0.15269	0.260566	0.351302	5.55862e-10	7.92275e-11
Glyma.17G171000	#REF!	-1.78563	-2.35563	5.66998	5.19282	7.76369	1.51332	1.8134	2.08633	1.98889	0.818052	0.813747	1.67123e-12	4.28916e-12
Glyma.14G176400	Phosphate-responsive 1 family protein	-1.76757	-1.61619	36.6238	34.4906	30.6863	8.32227	11.3937	10.2841	10.7089	11.988	10.419	2.01789e-45	1.04992e-55
Glyma.12G204100	#REF!	-1.76672	-1.56174	15.7973	15.2178	18.3396	5.49668	4.15804	4.91144	5.66158	5.82186	5.17985	1.05532e-28	9.03529e-26
Glyma.17G117200	early nodulin-related	-1.76292	-1.38362	1.89208	2.1561	1.93294	0.439859	0.440636	0.770832	0.454435	0.860719	0.942675	3.10199e-06	0.000354327
Glyma.07G090400	#REF!	-1.76046	-1.69316	3.30488	3.52108	3.82797	1.22287	1.24619	0.691163	1.26324	0.94008	1.07455	1.27558e-09	4.83189e-11
Glyma.14G195000	glutamine-dependent asparagine synthase 1	-1.75966	-1.81205	5.85339	6.61321	6.65297	1.83182	1.95446	1.88097	1.53112	2.13445	1.76581	1.00966e-37	1.28528e-30
Glyma.13G355200	Protein of unknown function (DUF1677)	-1.73781	-1.96274	1.93223	2.29335	3.87648	0.978993	0.42689	1.02924	0.805467	0.60699	0.657583	4.44913e-05	4.7376e-08
Glyma.15G066200	Cyclin D6;1	-1.7332	-1.59194	1.74425	1.62504	1.66621	0.252144	0.530067	0.726468	0.642373	0.454045	0.563788	2.22054e-06	1.65217e-09
Glyma.07G235000	molybdopterin biosynthesis MoaE family protein	-1.72641	-1.05518	1.12955	1.69724	1.48777	0.430091	0.4155	0.464035	0.708521	0.68583	0.666703	5.87845e-05	0.0206134
Glyma.06G064000	Integrase-type DNA-binding superfamily protein	-1.714	-1.59361	2.72486	3.79249	2.37501	1.18339	0.835641	0.711844	0.701987	1.51215	0.710139	1.9062e-07	3.52128e-05
Glyma.08G164400	zinc transporter 1 precursor	-1.71299	-1.80281	7.33123	8.18458	7.89905	2.54864	2.24366	2.38495	1.4144	2.38336	2.90323	3.84508e-31	1.03146e-16
Glyma.08G171400	#REF!	-1.71114	-1.84538	2.53384	2.31089	2.57124	1.08166	0.564504	0.652186	0.644964	0.565985	0.866309	0.000398312	6.6905e-05
Glyma.13G294200	#REF!	-1.68691	-1.5662	8.81721	9.32445	13.5645	3.43637	4.18301	2.28299	2.81355	4.09336	3.7642	4.79647e-09	3.2596e-09
Glyma.20G091300	Low temperature and salt responsive protein family	-1.68091	-1.73168	37.7473	41.6153	45.18	13.6506	13.0463	12.3339	13.3328	11.8021	12.2675	4.07967e-52	8.74989e-53
Glyma.12G185600	Protein of unknown function (DUF3049)	-1.67452	-1.75554	2.5479	2.49808	3.6572	0.903818	1.01613	0.818226	0.909831	0.927161	0.727397	1.8998e-12	4.64327e-13
Glyma.10G178400	calmodulin-like 11	-1.66679	-1.70445	7.03772	9.53851	8.62059	3.07669	2.28289	2.61964	1.87522	2.6071	3.23822	4.96051e-23	1.63424e-18
Glyma.11G063400	PQ-loop repeat family protein / transmembrane family protein	-1.65428	-1.42292	2.54358	2.42134	3.89462	0.866459	0.804463	1.14129	0.90184	1.44703	0.961308	1.09912e-09	6.44251e-07
Glyma.06G295900	#REF!	-1.65115	-1.57622	10.858	13.7372	16.5083	3.2173	6.43578	3.40515	3.30891	5.18931	5.16939	8.51513e-05	3.82535e-05
Glyma.06G052000	iron regulated transporter 3	-1.64627	-1.63675	37.2302	37.6214	46.883	13.5297	12.0284	12.7214	13.5981	12.1154	12.7296	5.36509e-60	2.76174e-58
Glyma.02G141900	alpha/beta-Hydrolases superfamily protein	-1.64449	-1.54748	43.7633	39.9491	37.5852	13.5101	11.7043	13.7745	14.1748	13.839	13.3926	2.28546e-70	4.37099e-78
Glyma.17G104600	#REF!	-1.64323	-1.72494	6.35292	5.86526	9.46925	1.76402	2.2251	2.97132	2.7076	1.32195	2.51327	2.31606e-09	5.27226e-09
Glyma.10G168100	ammonium transporter 1;2	-1.63527	-1.86888	3.15149	3.14357	3.02739	0.986325	0.979813	1.04376	0.783694	0.911036	0.848122	1.38355e-17	1.18967e-20
Glyma.13G094900	Xyloglucan endotransglucosylase/hydrolase family protein	-1.63079	-1.62313	74.7607	74.1255	80.1916	22.773	23.373	28.1299	24.4831	27.0959	22.6052	1.00504e-66	2.98908e-82
Glyma.02G142200	alpha/beta-Hydrolases superfamily protein	-1.63076	-1.38002	1.38787	1.57388	0.888284	0.508613	0.369691	0.358685	0.431003	0.687011	0.398962	2.18366e-06	0.000310316
Glyma.10G047100	aluminum sensitive 3	-1.61383	-1.95051	10.1728	11.0538	10.4464	4.39033	3.33116	2.69564	2.78192	3.07214	2.31122	3.43584e-19	3.90466e-34
Glyma.18G071100	translocation protein-related	-1.60854	-1.57928	13.0271	13.526	11.8834	4.60229	4.39059	3.67191	4.02655	4.79396	4.00211	1.01929e-32	1.18959e-31
Glyma.13G070300	Cellulose-synthase-like C4	-1.60608	-1.31666	5.7843	6.06368	4.90514	1.69267	2.10914	1.72192	2.13875	2.47984	2.08628	1.55551e-26	5.47406e-20
Glyma.16G100100	Bifunctional inhibitor/lipid-transfer protein/seed storage 2S albumin superfamily protein	-1.60065	-1.88127	1.50272	2.21035	3.10094	0.981771	0.92582	0.355366	0.329203	0.83093	0.69108	0.00373248	0.00029028
Glyma.04G055200	mechanosensitive channel of small conductance-like 10	-1.60035	-1.3451	1.44564	1.68525	1.61022	0.571559	0.359933	0.651712	0.431894	0.714183	0.714111	4.85685e-09	5.96594e-07
Glyma.14G162100	highly ABA-induced PP2C gene 3	-1.58376	-1.64047	14.5213	12.8264	16.3856	4.74446	5.17437	4.73567	4.62357	3.64744	5.75122	1.34426e-34	9.04038e-25
Glyma.08G189300	lipoxygenase 1	-1.57796	-1.38408	6.1349	6.08513	5.98557	2.22997	2.01112	1.88725	2.52385	2.06266	2.37449	2.34644e-39	2.05763e-28
Glyma.19G233900	respiratory burst oxidase homolog B	-1.56915	-1.20703	1.57632	1.49693	1.39822	0.572653	0.478734	0.39354	0.554962	0.597063	0.729536	1.85837e-11	7.80452e-08
Glyma.07G084600	#REF!	-1.56892	-1.78153	6.48158	5.88063	6.3498	1.5977	2.60499	2.11507	1.76454	1.69919	1.96414	8.59362e-15	3.86157e-27
Glyma.13G333400	C2H2-type zinc finger family protein	-1.5568	-1.40891	0.858386	0.677759	1.62839	0.30703	0.415074	0.357037	0.327724	0.342429	0.51911	0.014235	0.0330208
Glyma.17G117100	early nodulin-related	-1.53521	-1.37888	2.15609	2.78539	3.38162	1.00291	0.527958	1.33567	1.12359	1.08681	0.974912	0.000964009	0.000434172
Glyma.18G277500	#REF!	-1.52249	-1.66351	3.53035	3.75801	4.44031	1.80742	1.16975	1.12424	0.864089	1.28808	1.54633	1.80316e-08	1.83599e-09
Glyma.01G134600	homogentisate phytyltransferase 1	-1.5078	-1.2566	1.64812	1.02691	1.56332	0.601246	0.541927	0.353854	0.429545	0.768447	0.566527	0.000178799	0.00281522
Glyma.06G101900	EXORDIUM like 2	-1.50345	-1.48001	8.10344	6.9448	5.90265	3.3398	2.18281	1.92176	2.69805	2.5938	2.18272	4.07323e-11	6.30099e-15
Glyma.07G035200	hydroxyproline-rich glycoprotein family protein	-1.49783	-1.32341	3.44044	3.55819	3.23081	1.02407	1.35472	1.25412	1.28364	1.40848	1.38332	4.04965e-25	1.56756e-26
Glyma.12G186200	NAC domain containing protein 90	-1.49737	-1.24036	1.77726	1.56226	0.805237	0.379985	0.652051	0.439951	0.307623	0.669969	0.769948	0.00347136	0.0300478
Glyma.09G100100	#REF!	-1.48593	-2.01063	4.15794	0.930397	1.2834	0.507691	0.557392	0.372903	0.44678	0.400236	0.587743	0.000106655	5.98826e-06
Glyma.08G312000	spermidine hydroxycinnamoyl transferase	-1.48202	-1.38804	3.49418	3.91364	4.05797	1.29642	1.26278	1.55489	1.35098	1.96984	1.04243	3.65495e-16	5.29039e-09
Glyma.07G255400	mitogen-activated protein kinase 16	-1.47492	-1.36303	13.1133	13.3218	16.9531	5.01475	5.48305	5.3973	4.67799	5.84989	6.5495	1.58185e-36	1.66657e-25
Glyma.11G025200	Remorin family protein	-1.4599	-1.36471	1.03705	1.74249	1.97983	0.637919	0.766771	0.419579	0.378426	0.717509	0.598755	0.00391024	0.0152869
Glyma.14G082900	cytochrome P450, family 707, subfamily A, polypeptide 4	-1.45407	-1.37424	3.57781	2.99549	3.52588	1.18543	1.28073	1.23181	1.03618	1.66534	1.17833	3.52315e-13	8.22307e-09
Glyma.03G026000	Protein of unknown function (DUF1442)	-1.44925	-1.51432	5.81956	7.19855	7.02878	2.62038	2.27747	2.47948	2.06918	2.72305	2.20475	5.61328e-16	3.94628e-15
Glyma.17G049900	oxophytodienoate-reductase 3	-1.44486	-2.10706	1.84531	2.02277	1.84198	0.70253	0.7206	0.679473	0.369442	0.457746	0.487447	3.35597e-07	4.96618e-12
Glyma.09G235200	EXS (ERD1/XPR1/SYG1) family protein	-1.44079	-1.59171	6.06623	7.2123	6.03832	2.46593	2.55279	2.14979	2.09421	2.396	1.91366	1.95821e-27	5.6434e-30
Glyma.15G234800	Phosphatidylinositol-4-phosphate 5-kinase family protein	-1.432	-1.42731	1.22561	1.09921	0.955835	0.508572	0.242606	0.46822	0.464863	0.373973	0.377593	2.18371e-05	2.93279e-07
Glyma.01G154000	#REF!	-1.42965	-1.40253	1.80336	1.7914	1.12108	0.842886	0.468417	0.453645	0.676241	0.650117	0.443091	0.00121575	0.000795293
Glyma.18G281600	Cysteine proteinases superfamily protein	-1.42916	-1.13781	4.14602	4.5587	2.3651	1.20443	1.82382	1.09952	1.26313	1.72905	2.03317	6.61898e-09	1.30036e-06
Glyma.06G125800	Nodulin MtN3 family protein	-1.42428	-1.2833	2.95171	2.61684	3.74029	1.12399	0.908399	1.37523	1.36896	0.918657	1.47025	3.09323e-06	4.03361e-05
Glyma.01G211000	Glycosyl hydrolases family 32 protein	-1.42214	-1.5329	1.13279	1.26447	1.15222	0.343882	0.528547	0.455131	0.301115	0.445306	0.477358	7.45211e-07	1.45794e-07
Glyma.10G011000	glycerol-3-phosphate acyltransferase 3	-1.41498	-1.55753	9.80215	9.82383	8.98635	3.37902	3.55071	3.84375	3.38006	3.214	3.10258	3.49935e-33	3.30783e-41
Glyma.20G211700	calmodulin-like 11	-1.41242	-1.50507	10.4583	12.0339	15.0637	4.30489	5.05079	4.81148	3.12403	5.32205	4.76989	3.07721e-15	1.61946e-12
Glyma.18G182800	Haloacid dehalogenase-like hydrolase (HAD) superfamily protein	-1.40486	-2.16411	11.4229	9.34318	9.203	3.48314	4.37658	3.50075	2.20336	2.50586	1.9586	1.99607e-17	4.58028e-38
Glyma.12G067000	cytochrome P450, family 93, subfamily D, polypeptide 1	-1.39789	-1.2404	8.47741	9.11452	11.0877	3.82702	3.7734	3.34054	3.88292	3.97338	4.25628	1.50303e-23	6.59147e-20
Glyma.10G251400	ROP-interactive CRIB motif-containing protein 1	-1.39751	-1.3158	9.79496	7.47086	8.23382	3.15427	3.09532	3.46858	3.18783	3.20304	3.83132	6.28103e-23	5.80687e-20
Glyma.18G099500	fatty acid desaturase A	-1.39272	-1.11132	2.65084	2.0029	1.64352	0.896681	0.732457	0.777215	0.815151	1.12441	0.964535	8.94035e-08	4.77831e-05
Glyma.16G044300	HXXXD-type acyl-transferase family protein	-1.39148	-1.59872	4.47057	5.24492	4.62311	2.33667	1.79212	1.37139	1.18782	1.54103	1.99221	5.06788e-11	1.42092e-14
Glyma.07G114200	Fatty acid hydroxylase superfamily	-1.38659	-1.19133	3.92055	3.96887	4.21272	1.85749	1.37343	1.4228	1.66315	1.98249	1.64136	1.36845e-15	5.04594e-13
Glyma.12G184800	#REF!	-1.38307	-1.11552	3.5171	4.19395	5.13866	1.79794	1.77336	1.36621	1.64292	2.0146	2.2612	8.91841e-07	0.000110843
Glyma.06G265500	GRAS family transcription factor	-1.38191	-1.41067	6.52625	6.16212	7.13478	2.66423	2.47351	2.5036	2.65699	2.45283	2.32766	1.71318e-36	1.38931e-34
Glyma.06G044500	differentiation and greening-like 1	-1.37939	-1.11213	1.42836	2.25679	1.27827	0.544205	0.73946	0.622237	0.99575	0.953809	0.332309	0.00109796	0.0497953
Glyma.13G127500	multidrug resistance-associated protein 5	-1.37855	-1.39967	14.2349	11.61	15.3421	5.17472	5.19885	5.75228	5.47581	5.39805	4.79186	3.92237e-39	5.59121e-42
Glyma.02G208300	EXORDIUM like 2	-1.37597	-1.43415	10.3412	10.8704	9.8262	5.32829	3.43611	3.27689	3.95069	4.57692	2.91666	1.32914e-13	2.10823e-16
Glyma.09G021100	Pectin lyase-like superfamily protein	-1.37287	-1.36091	2.49838	2.00503	2.79438	1.23432	0.670058	0.924037	0.715581	1.00028	1.12019	1.10192e-05	3.83724e-06
Glyma.08G068800	HSP20-like chaperones superfamily protein	-1.3727	-1.33226	1.0719	1.60894	1.6105	0.660571	0.500823	0.500951	0.593231	0.336742	0.761729	0.00367551	0.0126847
Glyma.04G245000	Calcium-binding EF-hand family protein	-1.37015	-1.41402	0.913006	2.13864	1.64712	0.849612	0.705906	0.268191	0.704621	0.453165	0.588824	0.0426718	0.0140416
Glyma.18G267900	O-methyltransferase family protein	-1.36796	-1.76777	1.55316	1.53858	1.73989	0.518433	0.607464	0.752435	0.630552	0.470647	0.309442	9.33899e-05	5.72046e-06
Glyma.20G196900	Fe superoxide dismutase 2	-1.36454	-1.39642	179.996	185.547	185.058	71.6014	72.3774	70.9173	71.278	67.0542	70.4271	8.47318e-118	5.03576e-120
Glyma.13G067900	glucosyl transferase family 8	-1.36429	-1.30772	1.77106	2.14018	1.64148	0.934957	0.55058	0.67876	0.641334	0.602758	0.997331	4.14551e-05	0.000126787
Glyma.17G085600	#REF!	-1.35806	-1.43061	1.28207	1.62723	1.7803	0.750464	0.718749	0.374429	0.645645	0.559917	0.517737	0.00399111	0.000727703
Glyma.11G095600	hexokinase-like 1	-1.35648	-1.38653	13.3209	12.7554	13.4354	5.1953	5.32586	4.98123	4.83803	5.18003	5.06331	1.84991e-48	3.86525e-50
Glyma.14G176300	Phosphate-responsive 1 family protein	-1.35271	-1.3644	48.4432	47.6971	38.9886	19.5322	17.4436	16.2315	18.1639	16.2747	17.9357	1.23076e-36	1.93883e-41
Glyma.14G222700	Prolyl oligopeptidase family protein	-1.34625	-1.33445	30.0629	29.3444	32.4126	12.1069	12.2202	12.9186	12.2629	12.5471	10.9163	1.13518e-66	1.11341e-69
Glyma.08G144433	Phosphoglycerate mutase family protein	-1.34444	-1.44041	7.1395	7.61243	11.2169	3.76855	3.54055	2.93692	4.15045	2.44833	2.92911	3.73901e-06	6.16798e-06
Glyma.09G033800	#REF!	-1.33913	-1.35794	7.89619	7.71068	10.2229	4.12374	2.67025	3.47286	2.91495	2.86758	4.28516	1.79564e-12	1.09809e-12
Glyma.13G139300	#REF!	-1.33879	-1.02023	1.07675	1.375	1.25002	0.784406	0.217421	0.46654	0.590979	0.499975	0.733195	0.00722361	0.00579565
Glyma.06G039000	Protein phosphatase 2C family protein	-1.33823	-1.24271	9.55719	9.8178	8.64851	3.54068	3.8834	3.70075	3.49435	3.92933	4.39933	4.97602e-30	3.52847e-23
Glyma.15G134900	Major facilitator superfamily protein	-1.33358	-1.02837	1.51371	1.35809	1.70897	0.52954	0.516965	0.771581	0.526337	0.898506	0.816746	7.04021e-05	0.00426135
Glyma.03G101700	Fatty acid hydroxylase superfamily	-1.33273	-1.4623	14.9483	15.9223	16.0492	6.96774	5.53563	6.15089	5.92967	5.50882	5.37198	3.8278e-34	1.83627e-49
Glyma.06G102000	Phosphate-responsive 1 family protein	-1.33073	-1.202	15.2625	17.6747	14.2059	6.41902	6.41279	6.00402	7.08268	6.81919	6.53659	2.75276e-31	9.60064e-26
Glyma.12G238300	#REF!	-1.32672	-1.35947	7.35604	9.5979	8.33168	4.1925	2.75792	3.16031	2.98621	3.32508	3.50313	6.71417e-08	1.50917e-09
Glyma.13G072000	spermidine hydroxycinnamoyl transferase	-1.31315	-1.23664	10.3522	9.68415	11.5777	4.23081	4.35869	4.18491	4.32732	4.49202	4.55402	1.29374e-16	9.33478e-15
Glyma.10G051900	#REF!	-1.31272	-1.1825	2.31554	1.99493	2.11426	0.910012	0.832464	0.85279	0.99956	0.685635	1.14075	3.63659e-16	1.11291e-08
Glyma.07G181600	K-box region and MADS-box transcription factor family protein	-1.30781	-1.44428	4.80858	6.20531	7.35401	2.52695	2.68469	2.48298	2.66389	1.7	2.90742	3.15703e-12	8.15986e-10
Glyma.10G071000	purple acid phosphatase 22	-1.3066	-1.41969	2.21132	2.09893	2.37877	0.720211	1.51666	0.481174	0.717349	0.9867	0.785551	0.00153575	5.30844e-08
Glyma.13G304400	xyloglucan endotransglucosylase/hydrolase 9	-1.30216	-1.31224	190.197	191.828	189.336	77.0349	77.4771	78.3167	78.2141	77.6161	73.7613	1.23791e-116	8.74934e-110
Glyma.14G121400	Plant stearoyl-acyl-carrier-protein desaturase family protein	-1.30022	-1.41716	1.67396	1.77064	1.85519	0.472639	0.744943	0.929606	0.523362	0.651708	0.804417	6.93136e-05	8.141e-07
Glyma.14G012100	Nucleotide/sugar transporter family protein	-1.29561	-1.54547	1.85474	1.5016	1.38059	0.634118	0.437359	0.852538	0.555926	0.375761	0.686331	0.000276762	5.68178e-06
Glyma.18G247800	cyclin p4;1	-1.28651	-1.07635	11.0558	10.2049	10.6021	4.5205	4.60667	3.98891	5.43862	5.07301	4.56957	1.26116e-14	4.47189e-10
Glyma.11G198300	AMP-dependent synthetase and ligase family protein	-1.28105	-1.1205	2.80872	2.86145	2.981	1.29524	1.31212	0.970286	1.71192	1.02744	1.22912	6.09688e-10	3.16772e-06
Glyma.11G161600	Peroxidase superfamily protein	-1.27973	-1.17728	14.9624	14.8388	11.7262	6.32959	5.37415	5.4974	6.77566	6.27189	5.25953	1.31805e-19	5.80157e-15
Glyma.13G258100	#REF!	-1.27918	-1.34496	32.2493	39.7507	26.8739	16.0428	12.4903	12.4297	12.1737	12.2042	14.4601	1.19558e-14	5.86219e-18
Glyma.12G227700	Basic-leucine zipper (bZIP) transcription factor family protein	-1.26983	-1.35768	13.5865	13.817	11.5576	5.36987	5.5881	5.27791	5.29249	4.96038	4.90835	2.77284e-29	1.4489e-32
Glyma.09G276600	SOS3-interacting protein 4	-1.26908	-1.26929	2.68321	3.56666	3.79981	1.63014	1.28942	1.27261	1.27412	1.66562	1.21602	3.77877e-09	1.46275e-08
Glyma.13G272500	Basic-leucine zipper (bZIP) transcription factor family protein	-1.26736	-1.05993	9.81405	10.2943	7.77949	4.11308	3.68079	3.83642	4.52763	4.45218	4.3499	4.44532e-19	3.19213e-14
Glyma.07G015600	HPT phosphotransmitter 4	-1.26627	-1.76543	1.60235	1.69824	2.50718	0.593003	0.948329	0.877176	0.680852	0.48922	0.52165	0.000924988	1.16878e-06
Glyma.08G007400	Sec14p-like phosphatidylinositol transfer family protein	-1.2628	-1.72676	1.01003	1.98931	1.47551	0.61668	0.766904	0.480545	0.553988	0.252476	0.540716	0.012208	0.00101616
Glyma.13G230100	TRICHOME BIREFRINGENCE-LIKE 21	-1.26055	-1.25469	11.4923	9.97208	8.19988	4.27732	4.96531	3.19897	5.48664	3.83941	3.04645	2.06079e-11	2.85708e-09
Glyma.04G056133	P-type ATPase of Arabidopsis 2	-1.25783	-1.37726	1.98108	2.06392	2.58476	1.14763	1.03809	0.610409	1.013	0.661019	0.866399	0.000107894	3.11227e-06
Glyma.06G295800	#REF!	-1.24885	-1.4169	10.9544	10.151	14.1185	6.44217	3.89202	4.58294	4.38345	4.47829	4.29878	5.81007e-07	2.90372e-11
Glyma.03G175800	aluminum sensitive 3	-1.24145	-1.20409	6.28912	6.98692	7.33705	2.7456	2.62734	3.38164	2.55092	3.63156	2.73817	8.37765e-11	3.25913e-09
Glyma.08G295600	thioredoxin 2	-1.24133	-1.21095	4.72406	3.90971	5.70536	2.59661	1.57872	1.92808	2.67592	1.90832	1.58089	1.32344e-05	4.084e-05
Glyma.05G160900	#REF!	-1.23956	-1.14953	6.13376	6.75456	7.92639	3.21103	3.11123	2.53977	3.47179	2.79346	3.08645	9.72478e-10	1.5927e-08
Glyma.16G007700	germin-like protein 1	-1.23526	-1.21071	439.249	433.341	428.214	173.137	185.319	196.531	187.528	193.275	180.025	1.15936e-73	3.46768e-98
Glyma.03G005400	MATE efflux family protein	-1.23379	-1.27846	31.4015	32.9332	38.3209	15.774	14.294	13.8245	14.3942	14.5526	13.2767	2.03883e-37	2.03144e-41
Glyma.06G064400	Protein kinase superfamily protein	-1.23302	-1.11631	2.23315	2.18652	2.77286	1.28287	0.929177	0.864247	1.05527	1.31614	0.941618	4.47908e-07	3.9466e-06
Glyma.10G248400	with no lysine (K) kinase 1	-1.2313	-1.06217	5.76323	7.17971	7.0544	2.95003	2.80867	2.79636	2.85565	3.54529	3.14614	4.63675e-23	2.46847e-15
Glyma.08G144500	DNAse I-like superfamily protein	-1.2255	-1.02804	9.45216	9.62865	11.2639	4.66219	4.1161	4.24128	4.61808	4.5781	5.66939	4.03415e-08	1.21826e-05
Glyma.06G036600	#REF!	-1.22156	-1.17287	3.41105	3.22932	3.0413	1.58242	1.03778	1.5458	1.20677	1.2584	1.82178	1.61692e-07	4.78328e-07
Glyma.02G126600	#REF!	-1.21933	-1.52728	1.75795	1.54262	1.24123	0.601249	0.721981	0.630439	0.614303	0.573841	0.375087	0.000216037	2.04632e-05
Glyma.11G178300	calmodulin-binding receptor-like cytoplasmic kinase 1	-1.21894	-1.04278	8.79593	9.48373	12.9673	5.04393	4.88953	3.57461	4.7028	4.4762	5.97569	9.04404e-12	9.27578e-10
Glyma.13G316500	#REF!	-1.21549	-1.35848	2.66449	4.01873	4.72717	2.58005	0.919656	1.45487	1.18363	2.04353	1.20469	0.0089781	0.000515812
Glyma.09G016500	#REF!	-1.21519	-1.46479	1.44103	2.28923	2.98177	0.925603	0.767103	0.786549	0.904572	0.464633	0.831375	0.000828281	0.000209509
Glyma.20G241800	Peroxidase superfamily protein	-1.21458	-1.39744	1.58381	1.41511	1.33427	0.83761	0.49952	0.53324	0.682661	0.628079	0.325224	0.00108541	0.000544329
Glyma.16G200800	gibberellin 20 oxidase 2	-1.2125	-1.46248	1.3759	0.908229	1.14369	0.499314	0.548598	0.440641	0.438421	0.396307	0.40315	0.00155223	0.000113548
Glyma.05G242600	#REF!	-1.20922	-1.23653	20.661	20.4937	20.141	9.46628	9.30543	7.8895	9.03985	8.49094	8.42697	3.89261e-33	4.34147e-41
Glyma.12G137100	Protein kinase superfamily protein	-1.20578	-1.09856	4.00822	4.25145	4.25182	1.57217	1.85003	1.95256	2.00591	1.80435	2.05895	1.15013e-13	1.04346e-12
Glyma.01G131200	#REF!	-1.20388	-1.1399	3.71663	3.44972	3.17789	1.53581	1.58017	1.39516	1.70377	1.11767	1.86564	9.77206e-08	2.5837e-05
Glyma.16G020800	SAUR-like auxin-responsive protein family	-1.19913	-1.02114	2.73053	2.48526	2.30367	1.12091	1.28141	0.880408	1.48283	0.810546	1.39472	0.00215228	0.0207649
Glyma.08G037900	RHO guanyl-nucleotide exchange factor 11	-1.19704	-1.27979	4.78336	5.84196	5.00522	2.42524	2.69322	1.74568	2.24614	1.85398	2.33333	1.61026e-06	2.56823e-08
Glyma.12G197600	xyloglucan endotransglucosylase/hydrolase 9	-1.19662	-1.18714	111.745	117.076	99.2932	46.2738	46.948	50.5842	47.3941	47.4662	48.97	9.93569e-48	1.26621e-56
Glyma.13G152780	homogentisate phytyltransferase 1	-1.19261	-1.32537	17.4395	15.9785	15.6219	6.99469	6.59859	7.33982	6.12471	6.88921	5.63477	1.13211e-40	1.45261e-40
Glyma.05G230400	RHO guanyl-nucleotide exchange factor 11	-1.19047	-1.15689	1.76526	1.36416	1.81549	0.993084	0.705263	0.481385	0.933916	0.757531	0.495878	0.014722	0.0177665
Glyma.10G161000	N-MYC downregulated-like 1	-1.18931	-1.32415	12.4353	12.0739	12.7177	5.28451	5.6074	5.49776	5.21695	4.11028	5.50718	5.15426e-26	7.47416e-23
Glyma.05G166900	cytochrome P450, family 716, subfamily A, polypeptide 1	-1.18287	-1.13802	1.24925	0.95564	1.71041	0.735467	0.415663	0.579472	0.633263	0.65293	0.482805	0.00338216	0.00303291
Glyma.06G026300	glyoxal oxidase-related protein	-1.17946	-1.20212	1.58238	1.39116	1.71897	0.737449	0.749468	0.596249	0.751528	0.549016	0.732951	1.82058e-05	2.91396e-05
Glyma.05G152500	HXXXD-type acyl-transferase family protein	-1.17859	-1.25181	29.8333	30.8214	28.789	13.6077	12.5177	13.5798	11.421	13.9547	12.0981	1.37492e-44	7.08274e-39
Glyma.10G193500	Fe superoxide dismutase 2	-1.17582	-1.23677	107.812	110.634	114.546	48.6292	51.2513	48.2368	49.2403	47.1672	44.5688	5.03575e-66	6.11456e-67
Glyma.02G040700	uncoupling protein 5	-1.17267	-1.17663	40.3181	43.811	37.8865	16.8106	17.989	19.5559	18.173	18.6667	17.0175	1.58626e-38	1.13957e-46
Glyma.17G089500	Protein of unknown function (DUF1645)	-1.16987	-1.0292	0.993226	1.35221	0.936562	0.61235	0.436712	0.413232	0.462053	0.447136	0.699291	0.00406056	0.0172037
Glyma.20G223800	N-MYC downregulated-like 1	-1.16486	-1.2573	25.6573	25.3687	30.2772	14.2141	11.0983	11.1632	10.3362	11.3692	12.2557	7.96598e-23	1.6701e-33
Glyma.08G144367	Acyl-CoA N-acyltransferases (NAT) superfamily protein	-1.16341	-1.18825	3.13818	3.33795	4.59841	1.23124	1.57659	2.13045	1.46966	1.47703	1.89262	0.00119911	0.000278822
Glyma.19G250167	#REF!	-1.16289	-1.14372	66.4915	66.9584	62.5282	29.6356	30.5123	27.7979	30.2477	28.8155	29.4475	3.50412e-42	3.64629e-43
Glyma.20G067400	early nodulin-like protein 8	-1.16225	-1.3009	2.88904	2.07397	2.59007	1.05864	1.34819	0.977435	1.05945	1.3481	0.640883	9.19166e-05	0.000214078
Glyma.06G265700	NAD(P)-binding Rossmann-fold superfamily protein	-1.16189	-1.40671	9.69161	10.2742	11.6869	4.65953	4.69025	4.85185	3.38829	4.02692	4.49721	1.99255e-18	1.56543e-21
Glyma.09G181000	chlorophyllase 1	-1.15699	-1.17498	10.7588	10.9332	8.46394	4.83308	5.16626	3.5992	4.8328	3.7662	4.73302	1.19697e-10	1.8523e-12
Glyma.17G081200	AGAMOUS-like 8	-1.14978	-1.12396	14.0174	12.4929	18.1492	7.05116	6.64387	6.55515	6.37346	6.5038	7.56361	3.99911e-13	2.75419e-12
Glyma.06G050500	arabinogalactan protein 15	-1.14761	-1.26956	100.52	104.379	105.155	48.8601	44.0848	47.697	40.2005	42.2784	45.9263	1.87558e-41	3.86293e-49
Glyma.13G152168	IQ calmodulin-binding motif family protein	-1.14718	-1.19455	3.43414	2.77258	2.92193	1.13228	1.42496	1.5785	1.44531	1.13539	1.39912	3.11641e-07	2.23964e-08
Glyma.12G218900	Dynein light chain type 1 family protein	-1.14474	-1.86075	1.57737	2.98643	3.19187	1.11517	1.26658	1.14946	0.983298	0.559126	0.579481	0.00786323	3.0444e-05
Glyma.10G028300	cupin family protein	-1.14411	-1.02856	2.93771	2.95816	3.27648	1.43604	1.43495	0.968639	1.43721	1.39008	1.31087	2.46429e-08	1.33042e-07
Glyma.14G082200	Protein phosphatase 2C family protein	-1.13646	-1.14502	11.0979	11.0031	14.2016	5.91882	5.41956	5.26728	5.84707	4.98192	5.55205	3.40712e-20	5.98195e-20
Glyma.14G077400	thaumatin-like protein 3	-1.13486	-1.00876	3.31863	4.16674	2.23416	1.82586	0.956773	1.65582	1.41239	1.02035	2.39009	0.00240314	0.0146694
Glyma.08G069300	#REF!	-1.13332	-1.21556	83.1041	92.6501	86.1824	39.3753	39.731	40.851	37.5515	37.2948	37.7301	1.68034e-44	5.7846e-54
Glyma.11G032200	Eukaryotic aspartyl protease family protein	-1.13223	-1.02485	14.64	15.2048	15.0899	5.80836	7.75055	7.01655	7.35069	8.22561	6.44439	6.10814e-21	4.28806e-20
Glyma.20G145800	with no lysine (K) kinase 1	-1.13165	-1.19907	57.1066	53.5365	62.1135	29.1189	25.1478	25.0276	25.2631	24.8932	24.9411	2.09833e-43	4.31062e-64
Glyma.18G041300	#REF!	-1.1301	-1.26762	1.20236	1.47849	1.49895	0.637314	0.512965	0.760562	0.42164	0.728587	0.576758	0.00137174	0.000604249
Glyma.16G171400	disease resistance family protein / LRR family protein	-1.12472	-1.06096	2.82248	2.72238	3.09749	1.32441	1.04881	1.56812	1.34387	1.31865	1.38704	1.20171e-09	4.1105e-13
Glyma.15G057200	#REF!	-1.1228	-1.32298	27.2831	29.4058	23.9795	14.3321	11.5251	11.3868	10.6913	10.8274	10.6636	1.82377e-14	4.49878e-23
Glyma.09G111200	actin 1	-1.11941	-1.23338	14.9522	15.2665	14.1843	7.29335	6.90437	6.55023	5.86854	6.58642	6.39043	1.17243e-26	2.41082e-29
Glyma.04G021000	DC1 domain-containing protein	-1.11924	-1.13291	25.8383	27.4908	30.7648	12.816	12.9904	13.0597	12.9539	12.6088	12.6854	5.4156e-35	4.77034e-37
Glyma.18G064100	calmodulin-binding receptor-like cytoplasmic kinase 1	-1.11796	-1.08614	6.11531	5.34332	8.16547	3.32571	2.79244	2.97499	3.79507	2.97175	2.43997	1.50657e-09	2.97639e-07
Glyma.10G066100	heat shock transcription factor A3	-1.10969	-1.12129	2.64941	2.2793	2.54717	0.970773	1.33227	1.16788	0.975017	1.08428	1.37473	1.27163e-06	1.17173e-06
Glyma.11G044800	xyloglucan endotransglucosylase/hydrolase 6	-1.10852	-1.35594	12.518	13.8725	14.2431	7.07604	6.26908	5.60784	4.88829	5.06913	5.89888	2.31144e-18	7.95156e-28
Glyma.14G077333	thaumatin-like protein 3	-1.1075	-1.32074	13.2663	13.8165	10.558	7.94579	5.52426	4.14153	5.58616	5.46648	3.96143	7.94129e-07	4.39123e-13
Glyma.04G056067	P-type ATPase of Arabidopsis 2	-1.1075	-1.1906	1.5629	1.64437	1.97151	0.856154	0.653678	0.903294	0.556533	0.803718	0.896929	0.000431855	0.000322218
Glyma.17G259700	GDSL-like Lipase/Acylhydrolase superfamily protein	-1.10704	-1.11711	3.73164	3.8965	3.893	1.94301	2.07432	1.35705	2.05857	1.28782	1.95698	4.67973e-08	1.36115e-07
Glyma.12G213100	PDI-like 5-4	-1.10621	-1.12853	1.56487	1.51959	0.945861	0.699687	0.494224	0.519961	0.612152	0.56725	0.545427	0.0013902	0.000896114
Glyma.09G245400	cyclin p4;1	-1.10591	-1.58957	9.64415	10.0581	8.01158	3.67448	4.85342	4.37971	3.08477	3.23102	2.86407	3.47362e-09	1.69167e-19
Glyma.06G039100	BRI1 kinase inhibitor 1	-1.10469	-1.1232	11.6397	11.2542	10.0167	5.77182	4.68355	4.92959	4.44569	5.23763	5.39302	1.28638e-14	3.39528e-15
Glyma.17G232285	basic helix-loop-helix (bHLH) DNA-binding superfamily protein	-1.10234	-1.03534	17.6209	17.6962	17.3217	10.0884	8.79624	8.41188	10.0057	8.6587	9.42944	2.98217e-35	5.53752e-27
Glyma.11G218300	#REF!	-1.09952	-1.08811	14.2335	11.8547	10.7947	6.96034	4.3013	5.9863	8.04707	4.82315	4.40125	8.9487e-05	0.0006004
Glyma.08G117500	cellulose synthase family protein	-1.09912	-1.21426	7.35115	7.22081	5.73013	3.24679	3.36568	2.72251	2.91737	2.98951	2.60377	2.92102e-16	1.07881e-21
Glyma.09G053400	Ankyrin repeat family protein	-1.09804	-1.08371	2.67131	2.40076	3.03141	1.4102	1.18286	1.21135	1.48599	1.31455	1.00928	9.08634e-09	5.98863e-07
Glyma.13G343000	beta glucosidase 32	-1.09732	-1.19928	23.3656	28.3092	19.4692	12.7978	10.0157	10.6291	9.73598	10.3988	10.7961	2.20372e-15	7.31533e-22
Glyma.18G137500	xyloglucan:xyloglucosyl transferase 33	-1.08901	-1.36444	2.10027	2.26239	2.72978	1.25426	0.908585	1.18797	1.03258	1.0248	0.68555	1.1612e-07	6.40739e-10
Glyma.06G218000	Thioredoxin superfamily protein	-1.0875	-1.09458	3.77238	4.64626	5.81879	2.36931	2.64959	1.69532	2.33299	2.29257	2.03208	5.48347e-06	1.74717e-07
Glyma.04G104100	Protein of unknown function (DUF833)	-1.08337	-1.08664	23.7005	24.4561	24.5841	13.6186	10.9105	10.0114	10.1488	12.083	11.9632	5.52133e-19	3.48466e-25
Glyma.09G233800	Integrase-type DNA-binding superfamily protein	-1.08125	-1.1734	13.4699	13.53	14.4592	6.06853	6.16529	7.4414	5.50521	5.54055	7.31842	5.13925e-12	9.54905e-13
Glyma.06G137200	O-methyltransferase 1	-1.08073	-1.08233	6.86029	6.58278	5.8008	3.22356	3.76869	2.14994	2.80774	3.1661	3.08868	1.06049e-06	6.79707e-11
Glyma.13G100000	OSBP(oxysterol binding protein)-related protein 4B	-1.07903	-1.1678	3.27025	4.12641	3.40733	1.58998	1.9889	1.54927	1.5696	1.80495	1.41764	3.27521e-06	4.04683e-07
Glyma.17G237100	Gibberellin-regulated family protein	-1.07492	-1.11992	306.415	308.715	350.142	153.259	149.493	157.719	144.222	146.39	152.802	2.3549e-49	1.8482e-59
Glyma.18G120400	Fatty acid/sphingolipid desaturase	-1.0731	-1.03209	12.4979	11.9973	11.8333	6.0307	6.04393	5.28164	6.12379	5.52104	6.08295	9.6284e-26	3.94985e-25
Glyma.20G017900	Polyketide cyclase/dehydrase and lipid transport superfamily protein	-1.07062	-1.17046	184.4	192.278	186.928	104.79	85.6559	79.5444	81.0516	82.4982	86.4278	6.47406e-32	2.42656e-83
Glyma.05G144902	Restriction endonuclease, type II-like superfamily protein	-1.06561	-1.15664	5.52088	5.38957	6.66666	2.70137	3.09983	2.63106	3.06294	2.23159	2.56869	2.08257e-11	2.15774e-11
Glyma.06G291700	O-acyltransferase (WSD1-like) family protein	-1.06431	-1.08059	33.037	35.389	34.458	15.2238	16.8102	17.3712	16.9227	15.0195	16.6138	2.92362e-34	6.90154e-40
Glyma.07G270900	Polyketide cyclase/dehydrase and lipid transport superfamily protein	-1.06108	-1.10771	3.1421	2.5473	2.84145	1.55163	1.4532	1.01909	1.136	1.35647	1.3767	8.75419e-05	1.65713e-06
Glyma.01G196800	xyloglucan endotransglucosylase/hydrolase 6	-1.05912	-1.13633	20.784	20.1419	22.4123	9.85174	11.0758	9.61866	9.61721	9.54245	9.59861	8.35841e-26	3.63159e-35
Glyma.09G047900	Domain of unknown function (DUF23)	-1.0589	-1.06545	11.3247	11.2019	10.0576	5.61228	5.36426	4.74794	5.14328	4.6532	5.75082	1.51611e-20	1.2462e-19
Glyma.11G149200	IQ-domain 11	-1.05038	-1.12802	9.17476	9.87555	10.1259	5.2771	4.39059	4.49721	4.2458	4.15658	4.9279	2.64128e-18	2.64788e-21
Glyma.07G042600	Plant protein of unknown function (DUF936)	-1.04811	-1.11599	4.19328	4.23779	3.52785	1.90783	1.64602	2.24978	1.86765	1.99574	1.63296	3.43486e-08	4.67447e-10
Glyma.05G159966	cellulose synthase family protein	-1.04765	-1.15888	1.28551	1.35629	1.009	0.779567	0.333364	0.662517	0.515964	0.401196	0.71493	0.00384589	0.000130339
Glyma.10G261000	#REF!	-1.04304	-1.04273	2.04919	2.56989	2.86398	1.20423	1.10545	1.33569	1.52993	1.19468	0.892649	1.66457e-05	0.000254602
Glyma.12G039600	Plant calmodulin-binding protein-related	-1.04181	-1.23094	4.8883	5.04545	4.52515	2.44339	2.25853	2.35189	2.03317	1.95343	2.15823	4.57997e-18	1.14354e-23
Glyma.05G001700	MATE efflux family protein	-1.03925	-1.18121	1.4333	0.944654	1.15417	0.612642	0.770945	0.344485	0.601124	0.363029	0.585221	0.0244223	0.00396285
Glyma.11G236100	gamma-glutamyl transpeptidase 1	-1.03444	-1.14281	13.5054	13.8579	16.064	6.92866	7.76462	6.56824	6.06806	6.53689	7.026	4.39061e-19	3.44627e-25
Glyma.06G021400	RING/U-box superfamily protein	-1.03435	-1.15771	3.78517	3.89207	4.25203	1.98926	1.73456	2.11611	1.48208	2.29109	1.5498	2.46674e-05	3.71569e-05
Glyma.10G179200	EXORDIUM like 5	-1.02396	-1.05485	180.068	186.754	182.758	84.7495	92.8661	93.8641	88.0988	89.4604	86.4519	5.07467e-50	1.24563e-74
Glyma.11G129200	beta glucosidase 35	-1.0235	-1.66114	1.64869	1.46721	1.77706	0.829819	0.83775	0.818852	0.470391	0.454595	0.652349	0.000572974	2.40956e-07
Glyma.12G205100	Concanavalin A-like lectin protein kinase family protein	-1.01855	-1.15662	0.887227	1.33186	1.22975	0.49556	0.555928	0.6546	0.527387	0.46742	0.549152	0.00118595	0.000129431
Glyma.15G239600	#REF!	-1.01278	-1.06569	149.214	157.139	128.518	73.7564	69.6911	73.1429	70.0616	70.4455	66.7927	5.40257e-33	7.54989e-38
Glyma.15G042900	hercules receptor kinase 1	-1.01273	-1.05546	6.73339	5.81774	6.32369	3.47697	2.68271	3.25312	3.1185	3.07574	2.85668	2.49821e-16	9.32746e-22
Glyma.12G174100	auxin response factor 16	-1.01261	-1.07937	14.5764	13.6675	17.5493	7.81246	7.75659	7.23647	7.06959	6.84855	7.71604	2.83662e-20	4.24132e-23
Glyma.14G003800	#REF!	-1.01103	-1.05889	5.78865	5.54132	6.9454	3.67559	3.1206	2.3282	2.19686	2.95339	3.60503	1.74807e-05	9.50224e-06
Glyma.13G257700	#REF!	-1.00747	-1.08717	19.7282	19.9533	15.469	10.4666	9.52107	7.59425	8.53577	7.96877	9.40845	1.81024e-08	2.68443e-11
Glyma.11G085900	Transducin/WD40 repeat-like superfamily protein	-1.00226	-1.12726	1.47788	1.28658	1.27244	0.713825	0.559568	0.71182	0.52996	0.796237	0.450676	1.15657e-05	2.2533e-05
Glyma.06G050300	CCCH-type zinc finger family protein	1.00079	1.14209	10.6607	10.2545	9.67079	18.351	21.3798	21.7384	22.8978	23.1673	21.2944	1.6436e-19	1.69404e-32
Glyma.19G127950	RAD-like 6	1.00194	1.45046	2.19042	2.41016	1.44824	2.82928	5.6589	3.67081	5.73092	5.29645	5.47947	0.00460017	4.45931e-10
Glyma.15G071300	Aluminium induced protein with YGL and LRDR motifs	1.00737	1.02095	67.2352	50.9821	59.8035	117.613	121.677	119.254	118.757	120.742	123.049	6.31434e-24	1.24706e-26
Glyma.02G148200	Eukaryotic aspartyl protease family protein	1.00822	1.05438	2.53846	2.43208	2.73057	5.16387	5.16257	5.24911	5.65607	5.14675	5.17049	2.60421e-11	1.0399e-11
Glyma.12G112000	RING membrane-anchor 1	1.01174	1.02436	61.5116	57.0826	73.357	96.7264	107.048	136.721	139.011	100.876	103.7	4.40238e-24	8.23053e-27
Glyma.04G195300	SNF1-related protein kinase regulatory subunit gamma 1	1.01319	1.0358	14.3598	13.148	16.2004	29.0564	30.1599	29.4469	30.5745	28.3371	30.56	1.68907e-30	1.00168e-32
Glyma.13G183200	#REF!	1.01634	1.09681	8.65231	8.24199	8.97522	15.2595	18.346	18.9416	19.0607	18.2596	17.9039	1.11904e-19	6.43481e-35
Glyma.12G191500	cellulose synthase-like B4	1.01955	1.02996	1.4695	1.17779	1.32691	2.62352	2.85223	2.63752	2.79781	2.82512	2.4897	1.81546e-08	3.53518e-08
Glyma.07G191400	#REF!	1.02173	1.40823	2.21531	3.01268	2.80228	6.21161	5.42272	4.81896	6.12228	7.20915	8.03701	0.000394229	2.8232e-08
Glyma.02G024200	Actin cross-linking protein	1.02415	1.00793	4.28642	3.83584	3.86473	8.42206	8.20315	7.89212	7.37205	8.36818	8.33851	1.32702e-18	2.06041e-16
Glyma.17G138500	Glycosyl hydrolases family 32 protein	1.02537	1.06999	22.0856	22.349	20.4197	42.1562	44.5562	45.908	44.7994	46.8855	44.2015	6.19351e-42	1.68699e-52
Glyma.17G110300	xylogalacturonan deficient 1	1.02891	1.13294	1.6952	2.19912	1.56808	3.98483	3.76031	3.47738	3.93833	4.15385	3.87451	7.43242e-07	1.52902e-08
Glyma.02G059500	PQ-loop repeat family protein / transmembrane family protein	1.02955	1.04471	25.6284	22.7277	28.4678	54.2275	53.2946	47.5375	52.9062	49.2459	53.9145	1.04355e-28	1.40997e-32
Glyma.17G087900	Histidine kinase-, DNA gyrase B-, and HSP90-like ATPase family protein	1.03079	1.09078	2.09773	2.07076	2.6307	4.88901	4.88213	4.37989	3.45083	5.30882	5.38005	1.54613e-08	5.21829e-08
Glyma.13G043900	EXORDIUM like 2	1.03731	1.06042	14.6257	16.3108	16.9687	31.0922	31.6929	35.9797	34.0522	32.0361	33.6415	2.32568e-27	1.74836e-37
Glyma.17G230700	gamma vacuolar processing enzyme	1.04112	1.12556	40.7677	43.203	45.2157	87.9875	85.8485	91.7619	92.8525	91.1648	93.6648	9.77316e-53	2.84596e-72
Glyma.17G068800	sequence-specific DNA binding transcription factors	1.04144	1.06927	1.18354	0.933315	1.00513	2.1731	2.46227	1.94464	2.34926	2.2995	2.02312	0.000363602	0.000224146
Glyma.18G004900	#REF!	1.04169	1.01932	9.61384	10.2942	10.88	20.6986	21.0753	20.1567	20.3506	19.2899	21.2833	9.17579e-27	5.59939e-25
Glyma.17G047700	jasmonate-zim-domain protein 1	1.04888	1.09559	3.43438	4.13702	2.24411	6.50016	7.06521	6.84006	6.23903	7.62853	7.07229	1.10506e-05	3.65431e-06
Glyma.05G055000	copper chaperone for SOD1	1.05017	1.06637	12.2951	11.6811	10.6836	24.8473	23.3116	24.2331	22.4564	24.2893	26.0462	3.44487e-26	6.43039e-25
Glyma.11G121800	hemoglobin 1	1.05222	1.031	10.5716	10.5751	10.8992	21.6681	22.9357	21.2939	23.029	20.1065	21.7553	7.40795e-36	8.99469e-30
Glyma.09G208300	xyloglucan endotransglucosylase/hydrolase 30	1.06055	1.07131	3.44148	3.09659	3.7313	7.04654	7.44817	7.0402	7.31779	8.04663	6.16923	2.67774e-12	3.93454e-10
Glyma.12G099300	MATE efflux family protein	1.06113	1.22024	3.82817	4.1331	4.65214	8.65715	8.08786	9.70502	9.83868	9.45053	10.0635	1.08922e-15	1.64518e-25
Glyma.13G056100	HXXXD-type acyl-transferase family protein	1.06902	1.07024	2.04409	2.06746	2.65154	4.49901	4.68195	5.08015	4.46038	5.17142	4.54507	1.69793e-09	2.4556e-09
Glyma.08G351932	2-oxoglutarate (2OG) and Fe(II)-dependent oxygenase superfamily protein	1.07674	1.18668	10.2943	10.3752	9.25302	18.957	21.8157	22.6022	23.1112	23.8361	21.0009	1.8953e-23	6.87283e-34
Glyma.20G036100	ribonuclease 1	1.08353	1.14225	2.11112	2.61067	2.70626	5.173	5.38731	5.28386	5.006	5.67577	5.72005	6.45556e-07	1.89411e-07
Glyma.08G179600	Peroxidase superfamily protein	1.08537	1.11367	8.09065	8.20349	8.17763	18.4261	17.2244	16.583	17.2325	16.7508	18.9193	4.39846e-28	1.53733e-28
Glyma.01G089000	Nucleic acid-binding, OB-fold-like protein	1.0874	1.17439	2.53414	1.97116	2.43555	4.44588	5.08437	5.37982	5.90855	4.64081	5.20766	0.00221183	0.000784078
Glyma.20G144800	Haloacid dehalogenase-like hydrolase (HAD) superfamily protein	1.08993	1.06465	42.9266	37.3308	41.9177	88.4331	85.6244	87.2382	87.4185	81.5541	86.0706	3.66115e-47	1.38491e-44
Glyma.03G202600	plant U-box 22	1.09186	1.09245	2.75495	2.89599	2.92713	5.49204	6.63215	6.2512	5.5799	6.59318	6.10122	2.09826e-12	5.94551e-13
Glyma.18G085400	SHV3-like 1	1.09378	1.20742	8.43388	8.41078	9.72303	18.3139	18.6515	20.0144	20.9374	20.8435	19.4501	2.55241e-32	1.84384e-42
Glyma.01G208200	tonoplast intrinsic protein 2;3	1.09426	1.19106	4.23101	3.8191	3.3878	9.29964	7.19874	8.06835	8.25877	9.11614	8.69497	4.05916e-11	2.08663e-15
Glyma.08G032800	oxidative stress 3	1.09701	1.26771	1.85321	1.88887	3.12413	4.62947	6.01211	4.14511	4.86119	5.23178	6.45489	3.64862e-05	1.03034e-07
Glyma.12G108900	Auxin-responsive GH3 family protein	1.09771	1.03458	3.74188	3.28015	4.30898	8.32919	7.93808	8.1264	7.83376	8.3684	6.96407	4.63853e-16	1.9476e-12
Glyma.10G276000	#REF!	1.0989	1.33287	1.56228	1.37888	1.72019	3.10613	3.22346	3.71574	3.26403	4.62536	3.86278	5.74946e-05	6.01828e-07
Glyma.11G103100	pre-mRNA-processing protein 40C	1.10064	1.09838	2.04362	2.24592	1.94458	5.45568	3.97281	4.04144	4.82704	4.08836	4.31376	3.84929e-12	2.10823e-16
Glyma.06G170700	SNF1-related protein kinase regulatory subunit gamma 1	1.10601	1.10295	23.0389	19.1399	23.4672	43.7863	48.4321	48.0519	52.095	44.9327	48.1973	9.61973e-36	7.93248e-35
Glyma.03G079150	#REF!	1.10959	1.11329	1.17819	1.04238	2.41306	3.53665	3.32486	3.23025	3.55205	2.60625	3.90167	0.0157584	0.0197658
Glyma.13G234500	Thioredoxin superfamily protein	1.11218	1.149	6.6452	6.42346	5.1285	11.9855	12.8933	14.6516	14.5661	13.9073	11.804	4.05916e-11	7.29581e-12
Glyma.07G236000	Plant neutral invertase family protein	1.11443	1.08802	17.1663	16.3925	19.0779	37.9482	38.3156	38.4255	37.5811	37.5968	37.2946	1.8555e-49	3.86293e-49
Glyma.04G091600	Predicted AT-hook DNA-binding family protein	1.11778	1.07403	2.18962	2.31618	2.12132	4.93865	4.88813	4.64014	4.98996	5.20089	3.73214	1.22565e-13	1.09677e-08
Glyma.16G204600	Enolase	1.1183	1.08462	3.50857	3.33833	2.63744	6.06238	7.44541	7.1664	6.00808	7.36661	6.70112	2.51952e-11	4.14652e-11
Glyma.08G136100	#REF!	1.11836	1.10548	2.11981	2.3495	1.97864	3.38007	6.97616	3.69971	6.07787	4.05874	3.58373	0.000243384	1.73752e-05
Glyma.05G184500	WRKY DNA-binding protein 51	1.11907	1.11577	1.77022	2.13467	1.91741	3.88272	4.23335	4.57687	4.05569	4.16382	4.37519	3.63834e-06	3.1126e-06
Glyma.17G140400	Bifunctional inhibitor/lipid-transfer protein/seed storage 2S albumin superfamily protein	1.12033	1.13454	6.06516	5.60682	6.00739	12.571	12.3993	13.6538	13.3017	12.8839	12.5776	9.13789e-16	1.79429e-16
Glyma.18G004000	ATP-dependent RNA helicase, putative	1.1221	1.23009	1.38338	1.53198	1.63098	2.94228	3.55553	3.44675	3.41387	3.63167	3.60511	1.1756e-13	8.70262e-20
Glyma.13G285400	scarecrow-like 5	1.1234	1.22218	2.09829	1.97419	2.46977	4.93544	4.6881	4.75424	4.96497	5.15865	5.10144	1.42132e-14	1.11532e-17
Glyma.06G248900	NAC (No Apical Meristem) domain transcriptional regulator superfamily protein	1.12352	1.27322	1.34402	1.91601	1.43056	3.34513	3.39444	3.5361	2.96692	3.74296	4.63353	2.84846e-07	1.07427e-07
Glyma.08G150800	urophorphyrin methylase 1	1.12552	1.13537	12.2842	12.4609	11.4886	25.7637	27.4233	26.2447	28.313	25.57	25.541	6.19351e-42	6.53859e-39
Glyma.17G029200	Protein phosphatase 2C family protein	1.12672	1.17837	2.38316	2.00999	2.18564	4.25267	5.23174	4.94418	5.0441	4.46703	5.36091	1.04409e-11	8.19895e-14
Glyma.06G158800	Eukaryotic aspartyl protease family protein	1.12729	1.42548	1.64935	1.33066	1.35	3.15122	3.68073	2.69112	3.49869	4.55686	3.56379	2.87812e-07	1.81166e-12
Glyma.15G209200	polygalacturonase inhibiting protein 1	1.13155	1.17011	14.8101	13.4528	14.3473	30.9811	32.8341	30.0468	31.9935	32.2617	31.4703	7.05397e-34	5.22002e-39
Glyma.08G313300	polymerase gamma 2	1.13246	1.22411	4.20308	4.51781	4.90779	10.3903	10.1868	9.47159	10.4761	10.2721	11.0461	6.24821e-15	8.04929e-18
Glyma.08G220000	Chaperone DnaJ-domain superfamily protein	1.13749	1.15151	43.4221	44.1487	49.1198	97.6854	104.67	99.8443	98.5926	101.214	103.36	8.93007e-55	1.7278e-65
Glyma.02G053900	S-adenosyl-L-methionine-dependent methyltransferases superfamily protein	1.13988	1.08388	3.51733	3.6949	4.03755	7.71145	7.99987	9.04168	7.62761	7.91622	8.10639	1.21568e-15	1.09306e-15
Glyma.07G168900	tolB protein-related	1.14204	1.2116	9.8222	10.246	9.24498	19.5318	22.2286	22.849	23.1075	22.2363	22.5024	2.98217e-35	1.13965e-58
Glyma.05G043900	BTB and TAZ domain protein 2	1.14318	1.06458	20.7084	21.7929	24.0611	47.677	47.7741	52.3065	50.3899	43.1161	45.4916	4.04179e-29	1.83953e-23
Glyma.14G092800	gamma vacuolar processing enzyme	1.14544	1.19919	33.8668	31.3763	37.9385	77.3887	72.6721	79.2638	72.6791	82.6157	80.054	4.76446e-49	8.0136e-54
Glyma.20G186500	myb-like transcription factor family protein	1.14902	1.18084	1.62152	1.6908	1.64231	3.65599	3.53893	3.85276	3.94106	3.32187	3.96499	8.63943e-09	1.30827e-08
Glyma.11G208700	oxidative stress 3	1.15097	1.13914	33.3811	36.2382	40.6123	82.5974	83.2657	80.2106	78.8678	79.372	84.1984	1.66221e-41	4.24994e-42
Glyma.04G050300	CCCH-type zinc finger family protein	1.15342	1.21922	23.8999	22.3583	27.397	53.9901	54.8186	55.8573	55.9299	60.0168	55.2315	4.45754e-35	2.92301e-39
Glyma.20G227300	Plant protein of unknown function (DUF946)	1.15552	1.08505	4.45774	4.72229	4.56254	10.3889	9.32377	11.0533	9.81677	9.74791	9.5329	1.23244e-26	4.32572e-28
Glyma.07G266400	ARM repeat superfamily protein	1.16371	1.03433	3.72645	3.68231	3.58977	7.94913	8.30491	8.5055	7.07851	6.95465	8.47349	4.81335e-34	3.49258e-21
Glyma.18G213200	WRKY DNA-binding protein 70	1.16985	1.20461	6.46397	6.72612	6.34189	14.0961	14.9135	15.1613	15.4921	14.48	14.9718	2.29402e-23	2.66381e-25
Glyma.13G068800	cytochrome P450, family 82, subfamily C, polypeptide 4	1.17292	1.11947	1.72225	1.94113	2.3098	5.77165	3.96178	5.37359	4.94362	4.94214	3.05344	8.97149e-09	7.9249e-07
Glyma.13G361900	pleiotropic drug resistance 12	1.17464	1.13095	8.35632	9.13266	10.756	19.241	19.0156	24.5376	20.7939	19.4079	20.2077	3.38366e-23	7.95287e-35
Glyma.06G042100	DREB and EAR motif protein 3	1.1752	1.12715	5.39558	6.03743	5.64591	11.6744	14.3472	12.7244	11.9946	13.6036	11.6344	1.31195e-18	3.39852e-18
Glyma.18G022700	senescence associated gene 20	1.17743	1.12388	20.0483	22.7582	18.5918	37.4724	49.8608	52.0289	45.1437	45.795	42.5866	1.04798e-18	3.52759e-30
Glyma.13G029600	DNA-directed DNA polymerases	1.17858	1.23705	1.09057	1.23556	1.91627	4.04242	2.67497	3.06025	3.44452	2.41894	4.25813	0.0247179	0.0197694
Glyma.11G185700	cytochrome P450, family 94, subfamily C, polypeptide 1	1.18062	1.30279	1.88277	1.91174	1.75679	3.66996	4.18541	4.78613	3.93471	4.92435	4.82645	4.39385e-12	2.68563e-16
Glyma.13G179200	Protein of unknown function (DUF506)	1.18215	1.29299	2.01276	1.98856	3.24033	5.61046	5.95404	4.97414	5.929	5.58542	6.22379	4.25622e-07	4.8655e-09
Glyma.07G011700	phosphate starvation-induced gene 2	1.18288	1.21861	1.42065	0.759887	1.51095	3.20236	2.40955	2.83036	3.15681	2.86344	2.56372	0.000132757	4.94698e-05
Glyma.15G179600	jasmonate-zim-domain protein 1	1.18338	1.23383	44.9661	47.7403	43.5372	98.2403	104.295	110.216	106.165	106.398	108.258	1.20788e-55	1.70448e-80
Glyma.02G215700	matrix metalloproteinase	1.18368	1.26771	8.29743	9.47061	10.5236	19.5612	23.3707	21.6473	23.028	24.7965	20.157	8.54618e-21	9.0384e-24
Glyma.08G230100	MLP-like protein 43	1.18382	1.12266	1.40802	1.60713	0.945414	3.54238	3.22468	2.3098	2.81564	2.72638	3.07439	0.000906402	0.00100517
Glyma.14G073200	#REF!	1.18678	1.1154	5.5437	7.1076	7.54018	15.5613	16.8006	13.8428	14.7361	13.4167	15.6314	5.07845e-14	6.91919e-13
Glyma.20G000200	uridine-ribohydrolase 2	1.18784	1.03006	2.28699	2.16203	3.11084	5.8388	5.65437	5.59687	5.01465	5.1867	4.90303	2.50722e-09	1.11296e-06
Glyma.06G149120	#REF!	1.19556	1.07431	4.58793	3.5594	4.04526	8.90728	10.1337	9.05358	9.57827	8.60835	7.44968	1.32203e-11	4.05283e-08
Glyma.12G150500	Aluminium induced protein with YGL and LRDR motifs	1.19882	1.33867	2.4953	3.43856	3.8082	7.80898	7.363	7.31883	7.10512	8.52451	8.9906	3.14269e-16	3.44391e-19
Glyma.11G247600	glyceraldehyde-3-phosphate dehydrogenase C subunit 1	1.19941	1.21685	6.42721	6.18753	4.6867	14.6226	13.7771	11.576	12.5618	14.4838	13.1017	2.43899e-15	1.87745e-17
Glyma.13G285300	cytochrome P450, family 82, subfamily C, polypeptide 4	1.20092	1.2631	2.90632	2.35159	3.39029	6.59608	6.25307	7.13743	6.47566	7.62155	6.62723	9.74787e-13	4.75206e-14
Glyma.02G236800	cytokinin response factor 4	1.20444	1.1453	2.79499	1.94976	1.86758	5.34448	4.90451	5.07674	5.29661	4.67277	4.62936	5.27507e-11	1.51785e-09
Glyma.08G211100	Lactoylglutathione lyase / glyoxalase I family protein	1.21071	1.22567	1.00295	1.29678	1.04108	3.08185	2.15598	2.55351	3.27224	2.15553	2.38129	0.000318464	0.000522223
Glyma.18G026500	2-oxoglutarate (2OG) and Fe(II)-dependent oxygenase superfamily protein	1.21465	1.32086	3.49737	4.30966	3.13721	8.16468	8.66131	8.71873	9.34399	9.411	8.54867	8.02413e-16	3.91227e-19
Glyma.19G218300	AMP-dependent synthetase and ligase family protein	1.21719	1.2599	3.59288	3.02269	3.24473	7.91885	7.48241	7.69653	7.71879	8.29421	7.42755	6.90842e-23	1.14354e-23
Glyma.16G085600	Protein of unknown function (DUF506)	1.21785	1.04549	3.41217	2.4198	2.75924	5.72607	7.65547	6.6977	5.65841	5.9594	6.09431	1.20171e-09	4.38064e-08
Glyma.11G049100	#REF!	1.22264	1.17749	1.64131	0.996334	1.59561	3.5048	3.82492	2.63452	2.74619	3.43371	3.41135	0.00331004	0.00473034
Glyma.15G031400	beta glucosidase 17	1.22715	1.13811	33.0924	31.6246	37.2174	79.723	79.1982	80.9312	73.4928	73.3281	77.1506	2.57251e-56	5.23519e-51
Glyma.02G010900	WRKY DNA-binding protein 23	1.22954	1.37929	2.8615	2.3041	2.78689	6.24695	5.88858	6.63392	7.07392	7.05505	6.5415	3.73693e-14	1.05373e-18
Glyma.14G200800	O-methyltransferase family protein	1.23176	1.22968	1.36808	2.27294	1.54869	3.71885	4.14677	4.39513	3.8753	4.13474	4.15497	4.83296e-07	2.51113e-07
Glyma.09G173300	#REF!	1.23332	1.17233	3.21975	2.36375	4.80482	10.1011	9.78633	4.83534	6.48033	9.22694	7.81722	0.0203422	0.0161484
Glyma.08G292000	IAA-leucine resistant (ILR)-like 2	1.23429	1.21247	2.00453	2.90223	3.05779	5.59004	6.9208	6.31875	6.11986	6.23036	6.0869	5.02973e-10	1.13434e-10
Glyma.07G199000	squamosa promoter binding protein-like 4	1.23842	1.35387	1.03428	1.13616	1.05268	2.89694	2.70827	2.27634	2.57679	2.74547	2.84302	1.63608e-06	1.63195e-08
Glyma.13G092500	trehalose phosphatase/synthase 11	1.24347	1.261	7.1867	7.87322	9.95881	19.3155	19.2051	21.0079	20.2064	20.2484	19.404	5.79904e-25	5.63903e-28
Glyma.05G128500	#REF!	1.25765	1.14164	14.2654	15.7299	12.9441	39.6164	33.2621	30.4133	30.3296	31.714	32.5259	2.55624e-25	7.28973e-28
Glyma.05G043800	#REF!	1.26064	1.18859	8.50186	7.48067	10.1179	19.6402	22.4039	20.846	22.8081	19.2923	17.2732	1.74033e-17	4.47783e-13
Glyma.02G153000	Glutaredoxin family protein	1.26786	1.33189	10.6677	10.4177	9.8215	29.122	22.2849	23.5194	23.7974	27.1483	26.7872	2.06672e-21	2.43545e-30
Glyma.11G116600	Glucose-1-phosphate adenylyltransferase family protein	1.27386	1.28352	8.10744	7.162	6.62016	15.9777	17.8674	19.1518	20.0974	16.5652	16.4861	6.48287e-30	9.30828e-29
Glyma.18G130100	Domain of unknown function (DUF23)	1.27456	1.1212	1.21542	1.08202	1.03759	2.59757	2.30981	3.19877	2.63617	2.317	2.28813	1.22576e-08	3.10474e-07
Glyma.18G216800	Leucine-rich repeat protein kinase family protein	1.27627	1.19822	0.977201	1.01199	1.28433	2.84813	2.47983	2.68937	2.40913	2.69471	2.43271	1.45215e-13	1.08313e-11
Glyma.06G078100	protein kinase C-like zinc finger protein	1.28205	1.16313	9.65324	9.67791	6.65908	23.2978	21.7905	19.2976	20.7469	14.491	23.354	7.45057e-20	4.10902e-12
Glyma.16G131200	ferulic acid 5-hydroxylase 1	1.28332	1.30122	2.46761	2.46453	1.84114	6.39222	5.41619	4.77987	4.77032	5.10725	6.80756	9.91147e-13	5.64353e-12
Glyma.06G050100	branched-chain amino acid transaminase 2	1.2983	1.43169	8.2993	8.41708	7.97585	20.6211	19.8634	20.3742	20.6085	22.6875	23.1231	3.34155e-42	1.42752e-47
Glyma.12G042400	Glucose-1-phosphate adenylyltransferase family protein	1.30089	1.33493	3.30126	3.49729	3.89657	8.5164	8.94331	9.33645	9.90054	9.01069	8.46708	1.25103e-28	1.4689e-27
Glyma.05G186700	Integrase-type DNA-binding superfamily protein	1.31593	1.31441	4.66531	3.77913	3.89727	9.34813	9.4946	12.0216	9.42087	9.96891	11.2862	6.53273e-19	1.10993e-23
Glyma.03G222000	galactinol synthase 1	1.32153	1.14877	1.58651	1.23748	1.22648	3.19362	4.00126	2.98945	3.06814	2.87176	3.04061	1.06285e-08	4.48409e-07
Glyma.07G048100	NAC transcription factor-like 9	1.3287	1.2105	1.66175	1.56332	2.31076	5.80891	4.23091	3.98027	3.06116	4.03367	5.73377	2.1811e-09	2.81658e-06
Glyma.05G222000	galacturonic acid kinase	1.32893	1.33232	9.108	8.38431	10.0334	22.4845	22.5535	24.4416	22.9998	23.6552	22.5296	6.48056e-40	1.2765e-43
Glyma.16G071500	#REF!	1.33134	1.27626	3.96115	3.82141	3.86657	9.23404	9.19309	10.6723	10.1191	7.80247	9.9004	3.50707e-52	3.05611e-40
Glyma.06G193500	glutathione S-transferase tau 9	1.34958	1.05136	2.11953	2.17587	1.96113	6.21051	5.10197	4.75408	3.71852	4.16347	5.0899	3.4465e-14	1.70137e-07
Glyma.08G071100	white-brown complex homolog protein 11	1.34999	1.35362	2.69655	2.5449	3.40194	7.33885	7.5483	7.26996	7.21739	7.50321	7.34408	3.78401e-22	1.28785e-22
Glyma.07G212800	nitrite reductase 1	1.36371	1.37408	13.2734	12.3527	13.6734	32.6269	36.0412	32.9541	37.2971	32.2295	32.121	2.92623e-62	3.74393e-55
Glyma.13G043800	white-brown complex homolog protein 11	1.36733	1.29023	4.46136	4.6268	5.20347	11.7182	12.2033	13.1286	10.51	11.9735	12.4323	1.68743e-38	3.67684e-33
Glyma.19G151300	Disease resistance-responsive (dirigent-like protein) family protein	1.36817	1.17149	2.0662	2.07524	1.77012	3.99232	6.41773	4.93975	4.72934	3.54753	5.05218	5.38988e-08	2.34844e-06
Glyma.11G027400	non-yellowing 1	1.36986	1.35445	4.41034	4.17668	3.76878	10.491	10.4234	11.2029	10.7	10.9455	9.90525	2.63473e-25	8.96695e-24
Glyma.08G182900	nodulin MtN21 /EamA-like transporter family protein	1.36989	1.26969	1.23037	0.931342	1.43725	4.17097	2.29886	2.91118	3.04994	2.4309	3.19387	1.03552e-06	2.79132e-07
Glyma.13G181000	Aluminium induced protein with YGL and LRDR motifs	1.3825	1.53112	1.55014	0.892415	1.17163	3.23672	3.23074	3.0866	3.55111	3.52045	3.32005	1.18735e-07	1.11079e-09
Glyma.07G043000	Dormancy/auxin associated family protein	1.38273	1.12938	2.18453	2.2509	2.79332	6.60436	6.29678	6.04721	5.53308	4.96595	5.19283	3.33361e-12	2.44438e-07
Glyma.09G172500	MAP kinase kinase 9	1.38329	1.35659	5.51841	6.21291	6.4627	13.5714	16.72	17.3583	16.4125	15.1727	14.9131	2.11452e-24	6.34339e-31
Glyma.16G170100	#REF!	1.3865	1.47357	2.50344	2.77941	3.38973	7.09686	8.10463	7.62269	7.7109	9.11438	7.23558	4.4272e-13	5.85133e-14
Glyma.07G035800	#REF!	1.39056	1.40478	6.68709	6.99926	6.95589	18.0111	18.3793	17.945	19.7413	17.8626	17.0995	5.76763e-40	1.98709e-34
Glyma.02G132100	nitrite reductase 1	1.39071	1.33852	17.1588	18.1072	19.6804	48.0733	46.8726	49.8457	49.8482	44.788	44.02	9.54642e-73	4.1089e-59
Glyma.11G014700	Protein of unknown function (DUF506)	1.40108	1.3898	5.84463	7.58372	9.58997	22.0017	20.5763	18.5971	18.0521	20.729	21.4917	1.24385e-18	7.16449e-19
Glyma.20G101100	glutathione S-transferase TAU 8	1.40926	1.57394	0.566635	1.10386	1.62886	3.37296	2.99497	2.47585	3.22606	3.3183	3.27956	0.00051852	2.24849e-05
Glyma.09G080100	Cytidine/deoxycytidylate deaminase family protein	1.41056	1.44496	4.02331	4.45964	7.12309	16.0514	12.8566	12.8788	12.7081	13.5712	16.2261	4.35499e-12	2.94065e-13
Glyma.14G179200	#REF!	1.41692	1.42887	2.57869	2.04194	2.17797	5.48723	6.99637	5.77178	5.74789	7.10454	5.4219	1.33493e-11	2.06665e-11
Glyma.08G178000	EXORDIUM like 2	1.42025	1.2515	1.35924	1.76782	1.18812	3.50461	3.14284	4.95972	3.77937	3.01341	3.47309	4.14659e-08	1.62951e-07
Glyma.10G248900	Haloacid dehalogenase-like hydrolase (HAD) superfamily protein	1.42217	1.41729	69.5615	70.571	78.5885	183.145	203.584	202.085	190.539	197.549	195.038	6.41921e-69	8.11456e-89
Glyma.01G166000	Chaperone DnaJ-domain superfamily protein	1.4264	1.53468	19.2496	19.1334	18.3347	48.9354	51.4061	52.8171	52.6297	54.9608	56.457	6.54891e-62	6.14797e-81
Glyma.08G173400	NAC domain containing protein 1	1.42715	1.54817	1.9871	2.16442	3.6314	6.75876	7.26172	7.03423	7.20955	7.81811	7.7317	3.23181e-10	1.09809e-12
Glyma.06G032500	Sugar isomerase (SIS) family protein	1.44635	1.41513	3.10919	3.03704	3.87831	9.42159	8.64963	9.60796	8.43909	8.94609	9.48023	4.45094e-20	4.21454e-19
Glyma.18G061100	glutamine-dependent asparagine synthase 1	1.45958	1.53033	8.74473	11.3131	11.0602	25.3343	24.6466	28.5766	29.8728	30.5387	27.9025	1.55156e-57	4.28691e-72
Glyma.16G057600	chloride channel B	1.45964	1.36667	4.72602	4.37476	5.38936	12.4643	13.3386	14.2371	13.3737	12.2181	11.6972	8.0144e-47	4.03929e-42
Glyma.01G217700	osmotin 34	1.46686	1.412	2.01939	1.98461	2.21527	4.77108	7.18543	5.31962	5.71221	4.73906	6.08317	3.98229e-11	2.07184e-12
Glyma.14G102900	WRKY DNA-binding protein 40	1.47471	1.69211	0.852186	1.05927	1.12704	2.82416	2.57697	3.1135	3.67546	2.81088	3.33934	1.52887e-08	2.32343e-11
Glyma.14G201000	O-methyltransferase family protein	1.47605	1.24886	2.804	3.21568	2.99224	8.78197	7.9269	8.50545	6.68355	7.43519	7.27051	2.55299e-28	2.53767e-18
Glyma.19G223000	Glycosyl hydrolase superfamily protein	1.49654	1.51436	3.77573	4.21588	4.96614	11.8588	13.7568	12.465	11.4788	12.1977	14.2171	6.47279e-33	8.7909e-38
Glyma.03G221350	glycerol-3-phosphate acyltransferase 2	1.5003	1.59107	3.46014	3.71586	4.64284	10.1035	11.2829	11.0968	11.8424	11.4047	11.9815	7.30089e-31	7.43819e-39
Glyma.20G028350	Protein of unknown function (DUF567)	1.50535	1.43682	1.16042	1.4215	2.32178	4.9338	4.70263	4.38051	4.64875	3.17042	5.47305	2.09733e-07	1.2431e-05
Glyma.03G113200	NAD(P)-binding Rossmann-fold superfamily protein	1.506	1.46773	4.28911	4.85163	6.43392	16.2945	14.961	13.3533	14.4394	13.4496	15.2164	2.22663e-21	1.39664e-21
Glyma.10G053000	#REF!	1.52033	1.4413	4.37315	3.61117	6.23962	12.2343	14.6411	14.412	9.87547	11.255	17.782	4.16738e-05	0.000766421
Glyma.13G256000	Cox19-like CHCH family protein	1.52219	1.46896	6.25771	8.64012	7.35727	23.8981	21.4875	18.946	20.1045	21.8998	19.4964	2.67583e-24	1.77664e-24
Glyma.20G105300	ACT-like protein tyrosine kinase family protein	1.52531	1.54662	3.18671	3.11605	3.39991	8.90726	10.0388	9.16151	9.74409	9.29171	9.33463	3.40271e-43	8.43647e-49
Glyma.07G244700	Protein phosphatase 2C family protein	1.54322	1.43993	1.00057	1.26396	0.806531	3.02001	2.92047	3.0524	2.42105	2.69713	3.20494	2.77572e-11	1.00272e-08
Glyma.15G031500	NAD(P)-binding Rossmann-fold superfamily protein	1.5499	1.47611	13.108	11.7226	13.4765	39.4552	36.8921	36.5054	37.481	32.7251	36.2592	5.64792e-26	2.61511e-21
Glyma.16G004500	aminopeptidase M1	1.55013	1.70201	1.12131	0.760668	1.34607	2.51779	3.91523	3.11437	2.2531	4.33612	4.01803	0.03434	0.0178143
Glyma.13G242100	Aluminium induced protein with YGL and LRDR motifs	1.56441	1.5533	2.01556	1.37865	1.85532	4.89644	5.58787	5.12113	5.39467	5.63694	4.33867	2.61559e-18	4.34497e-16
Glyma.15G169100	xyloglucan endotransglycosylase 6	1.56456	1.50551	15.9171	16.16	17.9434	50.4408	47.3444	50.961	47.9992	48.3276	45.4387	1.80901e-78	5.27952e-73
Glyma.11G038600	TIFY domain/Divergent CCT motif family protein	1.56896	1.52863	12.8965	15.3291	10.1197	35.5452	38.0424	40.6794	35.1299	38.389	36.8927	2.38416e-31	1.02501e-32
Glyma.13G208100	Eukaryotic aspartyl protease family protein	1.59324	1.60992	1.6874	2.14241	2.06897	5.80211	5.57788	6.52493	7.02799	5.36536	5.58579	4.25576e-21	7.53133e-19
Glyma.11G170300	glutamine-dependent asparagine synthase 1	1.59695	1.5477	3.8111	3.28379	3.38894	10.1712	11.3889	10.319	10.4273	10.2181	9.95722	6.91553e-44	6.81785e-44
Glyma.17G140200	Bifunctional inhibitor/lipid-transfer protein/seed storage 2S albumin superfamily protein	1.60152	1.52006	1.75404	1.70535	2.10968	5.68413	5.50305	5.84969	4.92989	5.66613	5.3946	3.25139e-13	5.07258e-11
Glyma.07G243900	MLP-like protein 423	1.62466	1.76759	1.61788	1.71573	2.69843	5.70613	6.481	6.55738	5.75417	7.50619	7.31177	7.03729e-11	7.5296e-13
Glyma.13G084000	nitrate reductase 1	1.63255	1.68422	12.7247	13.4715	14.7137	39.3104	42.6709	45.4498	48.5787	41.4729	41.1324	1.14409e-80	5.03569e-83
Glyma.02G123200	O-fucosyltransferase family protein	1.63508	1.59721	0.843794	0.944103	1.25858	3.10832	2.87911	2.90463	3.26921	2.77749	3.13173	5.20284e-20	8.48862e-17
Glyma.18G005000	Protein of unknown function (DUF 3339)	1.64566	1.45013	1.81151	1.13075	1.01408	3.67834	3.57831	5.21949	4.77854	3.16736	2.8752	1.81107e-06	0.000150594
Glyma.19G211600	senescence-associated gene 21	1.65215	1.77213	1.2973	1.66143	1.28571	5.10007	4.01018	4.37962	4.3813	4.74539	5.4227	1.93845e-08	5.56796e-10
Glyma.06G032451	Sugar isomerase (SIS) family protein	1.67075	1.62262	2.03563	2.06664	2.74841	7.66338	7.05786	7.21586	6.67674	7.63609	6.76699	4.21372e-13	1.36604e-11
Glyma.15G022300	peptidase M20/M25/M40 family protein	1.68215	1.61696	5.79604	5.44436	6.54998	18.3966	19.2225	19.7626	17.06	17.1931	20.2783	7.15199e-56	4.03801e-46
Glyma.19G172200	heat shock protein 70	1.6829	1.76716	29.6736	29.1836	26.5526	121.318	29.9567	121.76	125.738	128.886	31.1885	0.0377929	0.0285376
Glyma.15G270100	#REF!	1.69013	1.70092	4.63677	5.00005	7.54533	19.0909	19.2919	17.4169	18.8559	17.5471	19.4253	2.76297e-20	3.40554e-21
Glyma.17G119000	#REF!	1.72083	1.67194	0.682477	1.4595	1.58561	4.5263	3.6763	4.21407	4.87857	3.91563	3.09291	2.92691e-06	2.21278e-05
Glyma.19G239800	dehydroquinate dehydratase, putative / shikimate dehydrogenase, putative	1.72595	1.50715	1.89458	1.53804	2.10855	6.51351	5.99303	5.94229	4.62484	4.86255	6.26877	6.90842e-23	1.07414e-13
Glyma.04G026400	glyoxal oxidase-related protein	1.73572	1.72464	5.76076	5.00988	5.01099	15.0294	18.7379	19.0123	17.4674	16.6761	17.9363	6.42961e-46	2.30022e-68
Glyma.01G204400	TIFY domain/Divergent CCT motif family protein	1.73782	1.77104	17.3208	17.7207	15.3175	55.0015	54.8323	58.9249	56.0412	60.8454	54.6283	1.10565e-92	8.10793e-96
Glyma.04G041200	DREB and EAR motif protein 3	1.7548	1.77593	6.41454	7.12588	6.83751	22.3953	22.7492	27.4255	22.8976	28.0617	22.3347	1.3547e-46	3.75612e-46
Glyma.16G020500	Basic helix-loop-helix (bHLH) DNA-binding family protein	1.80594	1.81431	1.11835	1.43077	1.11833	4.42607	4.09786	4.38956	4.36603	4.21605	4.31676	5.79904e-25	3.69627e-25
Glyma.16G123400	#REF!	1.81969	1.76164	2.69474	2.78527	2.78142	10.6965	9.92041	8.75343	8.31915	7.52405	12.1953	9.68995e-27	1.33358e-16
Glyma.03G132900	beta-1,3-glucanase 1	1.82916	1.80642	1.44449	1.8582	1.93902	5.47205	7.53145	5.73851	5.89043	6.49757	5.94532	7.99841e-20	9.18497e-24
Glyma.06G302200	terpene synthase-like sequence-1,8-cineole	1.8708	1.89709	4.01748	3.83359	4.93174	15.3633	14.915	16.7336	16.0832	17.0111	14.4426	7.15199e-56	9.40844e-56
Glyma.02G190900	#REF!	1.9064	2.03237	1.33859	1.38256	1.13866	4.57041	5.30626	4.66432	5.69881	6.65611	3.37573	1.42687e-14	2.41893e-11
Glyma.13G329900	#REF!	1.95103	2.0409	0.745193	1.66884	1.59015	4.80016	4.97352	5.90323	5.38512	4.70871	6.49552	1.22901e-07	2.02387e-08
Glyma.19G089800	chloride channel B	1.96303	1.88089	4.96933	5.18818	5.38308	20.3395	20.9341	20.4747	18.9202	18.7408	20.2606	1.55215e-138	3.2552e-122
Glyma.14G056300	Polyketide cyclase/dehydrase and lipid transport superfamily protein	1.97925	1.94774	4.9049	5.28916	5.94351	20.5103	22.2128	21.2605	22.0015	18.6611	21.5285	5.85419e-65	5.79777e-57
Glyma.11G003500	Pyridoxal-5'-phosphate-dependent enzyme family protein	2.0007	1.83218	1.64112	2.3451	2.46206	8.31194	8.22271	9.40277	8.28183	7.34904	7.28595	1.80808e-33	2.08759e-27
Glyma.20G028300	#REF!	2.0205	1.84065	1.71001	1.42792	1.73414	7.72995	5.61459	6.59966	5.4797	5.03173	6.97999	8.48767e-24	4.49184e-18
Glyma.06G116400	amino acid permease 3	2.02461	2.12683	1.45121	2.47186	1.63675	7.38321	7.00412	8.35326	8.22262	8.46568	7.55901	2.71871e-25	2.43545e-30
Glyma.20G186200	AP2/B3 transcription factor family protein	2.03761	1.92907	0.892555	1.36585	1.37587	4.89009	4.27139	5.84082	4.28584	4.68922	4.85774	4.57786e-19	1.02443e-18
Glyma.13G279900	NAC domain containing protein 3	2.04843	2.07012	2.22922	2.49267	2.44478	9.35851	10.4351	10.0212	9.95033	9.3431	10.7943	2.96054e-54	2.57865e-55
Glyma.17G140300	Bifunctional inhibitor/lipid-transfer protein/seed storage 2S albumin superfamily protein	2.12441	1.9222	4.0769	4.89963	4.73625	17.5183	22.4058	20.2541	17.8565	15.576	18.564	7.62998e-43	7.45559e-37
Glyma.09G062600	xyloglucan endotransglycosylase 6	2.12469	2.12665	11.2715	12.2179	13.7264	52.1437	52.7845	58.1812	56.0883	53.7455	52.4096	3.40907e-108	1.12898e-122
Glyma.04G123800	alternative oxidase 1A	2.14798	2.23613	1.05749	1.60096	1.61202	5.62195	6.83995	6.55893	7.42222	7.09994	5.55967	7.74453e-33	6.87283e-34
Glyma.08G171800	#REF!	2.18738	1.85751	3.09933	2.9263	2.53134	12.5967	13.5247	14.7708	14.4838	13.5072	3.81289	3.39332e-100	0.0078773
Glyma.13G246600	NAD(P)H dehydrogenase B2	2.25169	2.21147	1.75314	1.91611	1.88009	8.62362	10.375	7.62088	8.97132	8.61915	8.15158	1.15252e-53	6.31315e-69
Glyma.02G257700	2-oxoglutarate (2OG) and Fe(II)-dependent oxygenase superfamily protein	2.47459	2.50915	1.51901	1.63569	1.29541	7.28805	8.82371	8.77801	8.07441	8.51244	8.75915	2.53709e-51	2.1261e-61
Glyma.20G205800	Serine protease inhibitor, potato inhibitor I-type family protein	2.53131	2.3539	1.10176	1.25301	1.632	9.46501	8.22317	5.65394	5.60808	4.84288	10.0594	3.45486e-19	1.04538e-12
Glyma.15G062700	basic pathogenesis-related protein 1	2.62674	2.57268	10.983	12.1789	16.524	83.8006	83.3208	79.406	77.7699	77.2107	80.8563	5.17697e-101	3.11046e-102
Glyma.09G238100	Transmembrane amino acid transporter family protein	2.69352	2.82954	1.85053	1.41519	0.723483	7.31703	8.76043	10.0717	9.35539	9.19393	9.81111	7.57928e-10	2.85561e-12
Glyma.11G171400	glutamine-dependent asparagine synthase 1	2.87991	2.83325	3.635	3.8577	3.26513	25.7227	28.4631	26.7336	28.6429	24.9336	23.8032	1.04056e-208	3.53427e-175
Glyma.12G221500	NAC (No Apical Meristem) domain transcriptional regulator superfamily protein	3.10714	3.13988	0.96062	0.895065	1.60964	10.0613	10.4789	9.70984	10.5695	10.1031	10.0703	1.33982e-57	2.3924e-61
Glyma.12G100600	Homeodomain-like superfamily protein	3.358	3.2801	1.03862	1.33851	1.6058	15.6397	13.9583	11.6282	10.4864	14.0148	14.2801	4.74157e-64	2.89275e-57
Glyma.18G046400	cysteine-rich RLK (RECEPTOR-like protein kinase) 3	1.00833	1.0004	0.401126	0.483224	0.654577	0.999932	1.13714	0.991167	0.950482	1.00263	1.17279	0.0052713	0.00704162
Glyma.17G155500	ATP binding microtubule motor family protein	1.05239	1.02896	0.754579	0.840817	0.793851	2.02449	1.5387	1.53496	1.4092	2.07842	1.47992	0.0014727	0.00413746
Glyma.05G231800	aldehyde dehydrogenase 2C4	1.0538	1.30637	0.866208	0.461686	0.83162	1.36154	1.30152	1.8449	1.47809	1.97385	1.89733	0.00505191	6.48788e-05
Glyma.17G222500	WRKY DNA-binding protein 40	1.08753	1.02629	0.707613	0.802909	0.918102	1.42566	1.94903	1.81345	1.57422	1.76475	1.60237	0.000269081	0.000424989
Glyma.08G181100	xylem NAC domain 1	1.08832	1.1081	0.737201	0.609763	0.733611	1.35277	1.35945	1.73409	1.71562	1.26636	1.50866	0.00470468	0.00445087
Glyma.01G193300	BTB and TAZ domain protein 4	1.09108	1.1469	0.406564	0.69281	0.85729	1.3455	1.45006	1.40238	1.78071	0.999023	1.55522	0.00667851	0.00872991
Glyma.06G124000	glycolipid transfer protein 2	1.09244	1.00519	0.71915	0.485113	0.83004	1.41854	1.799	1.15898	1.30023	1.4337	1.36576	0.0145039	0.0236531
Glyma.20G229700	#REF!	1.10702	1.02971	1.1632	1.06141	0.600976	2.35677	1.54761	2.21256	1.57147	2.33121	1.8575	0.00219648	0.00509685
Glyma.03G210500	Thioredoxin superfamily protein	1.11924	1.15716	1.00781	0.739974	0.675719	1.48656	1.75026	2.05054	1.49125	1.93326	1.99441	0.00535639	0.00344078
Glyma.05G211502	monodehydroascorbate reductase 6	1.14639	1.00072	0.654566	0.39617	0.794901	1.46874	1.61593	1.02536	1.18556	1.02883	1.48607	0.0014183	0.00734061
Glyma.09G159000	Protein of unknown function, DUF599	1.1749	1.86193	0.577674	0.935193	0.999308	2.53071	1.66174	1.53364	2.77637	2.76239	3.62697	0.0083209	1.0444e-08
Glyma.07G152000	Plant protein of unknown function (DUF828)	1.1854	1.01046	0.669243	0.532882	0.684905	1.0657	1.9366	1.32107	1.54754	0.785321	1.47144	0.00285172	0.025994
Glyma.17G128000	malate synthase	1.1882	1.32979	0.813038	0.4941	0.822962	1.4496	1.52321	1.91195	1.75117	1.79853	1.80808	7.01958e-05	7.45154e-07
Glyma.18G189600	Major facilitator superfamily protein	1.18941	1.18099	0.45874	0.594052	0.366599	1.11432	1.16291	0.984839	0.809865	1.36979	1.0418	0.00114251	0.00391883
Glyma.08G000700	#REF!	1.20602	1.21545	0.437788	0.426063	0.447962	1.22155	0.695553	1.14829	0.961367	1.06467	1.03753	0.00440648	0.00122654
Glyma.20G137700	cysteine-rich RLK (RECEPTOR-like protein kinase) 29	1.21465	1.93178	0.492879	0.598595	0.264107	0.901366	1.2448	1.02005	2.1299	1.19786	1.85629	0.00320754	2.7461e-08
Glyma.04G040000	HXXXD-type acyl-transferase family protein	1.26371	1.31834	0.499689	0.408443	0.444237	0.946251	1.08518	1.23606	1.17486	1.21219	0.987899	3.03322e-06	6.07168e-07
Glyma.11G197500	PLAT/LH2 domain-containing lipoxygenase family protein	1.27762	1.29775	0.556604	0.66102	0.765761	1.41644	1.56949	1.84107	1.6202	1.19737	2.05976	3.94239e-06	2.41441e-05
Glyma.15G274200	Polyketide cyclase/dehydrase and lipid transport superfamily protein	1.28359	1.48178	0.686614	0.664898	1.00272	2.36565	2.01809	1.4187	2.37623	2.16969	2.03619	0.0060593	0.000263335
Glyma.18G268200	HXXXD-type acyl-transferase family protein	1.29642	1.02577	0.519869	0.576599	0.481784	1.05321	1.2524	1.60046	1.09477	0.97139	1.15559	0.000200559	0.00581036
Glyma.01G105600	#REF!	1.30464	1.11731	0.577521	0.582154	1.02026	1.85497	1.67729	1.85444	1.47168	1.48633	1.7504	0.000403578	0.00603872
Glyma.15G105300	TRICHOME BIREFRINGENCE-LIKE 11	1.30662	1.42645	0.706505	0.499021	1.01452	1.70715	2.04831	1.83506	2.00518	2.05813	1.97807	1.48504e-05	4.98029e-07
Glyma.02G130400	Chalcone and stilbene synthase family protein	1.3151	1.76225	0.573596	0.630414	1.05729	2.21452	1.55855	1.90795	2.58941	2.79308	2.29444	0.000298652	8.50653e-09
Glyma.16G181300	NAD(P)-binding Rossmann-fold superfamily protein	1.32955	1.15904	0.547324	0.650268	0.563971	1.20197	1.73933	1.51307	0.887091	1.17785	1.88664	0.000132043	0.00835537
Glyma.13G331000	CCT motif family protein	1.3498	1.30145	0.613175	0.431169	0.311822	1.00476	1.24543	1.22868	1.21937	1.0369	1.09332	0.00533917	0.00880998
Glyma.04G058400	histidine kinase 5	1.35104	1.21906	0.610739	0.504814	0.323712	0.672073	1.82619	1.18902	1.11807	1.13754	1.09372	0.000697081	2.76517e-05
Glyma.08G348600	UDP-glucosyl transferase 73B1	1.35831	1.33105	0.819889	0.661009	0.453512	2.05595	1.12011	1.83634	1.71572	1.62982	1.52866	0.00190128	0.000783413
Glyma.12G092600	NAD(P)-binding Rossmann-fold superfamily protein	1.36358	1.22175	0.627453	0.82407	0.879883	2.38613	2.13114	1.51271	1.97924	1.87724	1.57114	9.92948e-05	0.0005832
Glyma.17G036900	serine carboxypeptidase-like 33	1.37941	1.29551	0.751963	0.453327	0.742076	1.88745	1.80974	1.44352	1.56872	1.39149	1.85339	0.000837546	0.00292087
Glyma.08G077900	Late embryogenesis abundant (LEA) hydroxyproline-rich glycoprotein family	1.38411	1.54759	0.267457	0.435946	0.684716	1.73091	1.44269	1.01863	1.55316	1.92897	1.66137	0.000313598	1.14675e-05
Glyma.14G071600	HXXXD-type acyl-transferase family protein	1.39141	1.73558	0.525656	0.357497	0.403234	1.21576	0.809347	1.44477	1.34953	1.3347	1.69044	0.000835866	4.12763e-07
Glyma.13G183700	serine carboxypeptidase-like 31	1.39709	1.22005	0.599713	0.352316	0.485324	1.25897	1.28284	1.27907	0.747149	1.57909	1.03244	3.51323e-05	0.00627634
Glyma.01G173800	ARM repeat superfamily protein	1.40009	1.40141	0.301339	0.533374	0.41555	1.04487	1.06909	1.20433	1.16196	1.11736	1.0231	2.41593e-06	2.35916e-06
Glyma.03G210200	Thioredoxin superfamily protein	1.40041	1.22294	0.716662	0.563011	1.33149	2.46499	2.75334	1.75079	1.14866	3.09715	1.87029	0.00447676	0.0467594
Glyma.13G119000	P-glycoprotein 11	1.40052	1.52353	0.603938	0.399391	0.573772	1.2985	1.46143	1.42318	1.42342	1.44127	1.67583	2.3435e-10	1.44276e-12
Glyma.18G203100	Plant protein of unknown function (DUF828)	1.41667	1.51194	0.391514	0.569185	0.665791	1.34079	1.67669	1.35488	1.04871	1.79498	1.8083	5.60004e-05	6.54891e-05
Glyma.04G251000	nodulin MtN21 /EamA-like transporter family protein	1.42441	1.57946	0.230442	0.42341	0.851407	1.25841	1.36964	1.44145	1.5586	1.46412	1.47676	0.00698508	0.00126932
Glyma.17G030000	MLP-like protein 423	1.42457	1.17522	0.737959	0.729492	0.660275	1.80988	2.08608	1.89214	1.05324	1.79539	1.98382	0.000189226	0.017934
Glyma.02G228300	mitogen-activated protein kinase kinase kinase 14	1.43331	1.1025	0.385214	0.492081	0.649134	0.930378	1.56174	1.64479	1.28012	1.19706	0.791468	0.000665571	0.0199931
Glyma.10G275900	carboxyesterase 17	1.43422	1.57304	0.616846	0.275386	0.276301	0.97215	1.2962	0.926234	0.801614	0.645498	2.06155	0.00838515	0.0143395
Glyma.19G011700	Peroxidase superfamily protein	1.45201	1.53095	0.93276	1.02191	1.03611	3.16349	2.88304	2.69201	3.04722	2.85823	2.53713	2.52594e-15	5.75334e-17
Glyma.19G207400	Thioredoxin superfamily protein	1.45771	1.42919	0.481337	0.550389	0.786939	1.23496	1.78491	2.01392	1.38431	2.07005	1.44378	0.00274914	0.00362457
Glyma.05G069150	DYNAMIN-like 1C	1.47452	1.29997	0.638791	0.666002	1.41179	3.04909	2.50806	2.06138	2.2211	2.12046	2.34841	4.77547e-05	0.000381804
Glyma.09G022300	peroxidase 2	1.47481	1.56084	0.588985	0.820279	0.695363	2.02666	2.06545	1.80052	1.83678	2.22259	2.1464	6.61259e-07	1.30533e-07
Glyma.08G010500	HXXXD-type acyl-transferase family protein	1.48096	1.34579	1.05862	1.10524	0.530071	2.41653	2.52088	2.62444	2.47427	1.99391	2.36965	5.86205e-07	1.62451e-05
Glyma.04G103400	tetratricopeptide repeat (TPR)-containing protein	1.51205	1.65851	0.531854	0.590566	0.413674	1.39845	1.27683	1.73732	1.63719	1.8475	1.36896	9.93471e-09	5.42005e-11
Glyma.01G051300	NAC-like, activated by AP3/PI	1.51213	1.56511	0.639318	0.59375	0.373289	1.42925	1.52182	1.66442	1.86416	1.50377	1.39099	7.06227e-05	5.51201e-05
Glyma.15G173800	RING/U-box superfamily protein	1.52097	1.51076	0.578526	0.544475	0.850362	2.07413	1.99619	1.68542	2.06217	1.92785	1.67381	1.50871e-05	2.70283e-05
Glyma.03G147900	Disease resistance-responsive (dirigent-like protein) family protein	1.52312	1.37347	0.635979	0.710118	1.38066	2.68048	2.63877	2.5877	2.12364	2.30705	2.65438	1.64632e-05	0.000265776
Glyma.02G214600	Homeodomain-like superfamily protein	1.52946	1.61808	0.649092	0.977732	0.685307	2.22724	2.07233	1.82351	1.77737	2.28731	2.04508	3.71311e-08	4.69025e-09
Glyma.01G185800	heat shock factor 4	1.56925	1.54666	0.846112	0.80296	0.785981	2.05883	2.60066	2.61463	2.17623	2.3845	2.56053	1.41892e-15	9.40502e-17
Glyma.14G080200	Protein of unknown function (DUF1645)	1.56929	1.65974	0.572613	0.651461	0.650799	1.79469	1.78861	2.02644	1.84538	2.1214	1.96665	5.84562e-08	6.01317e-09
Glyma.18G094800	#REF!	1.57178	1.15552	0.71803	0.706292	0.823313	2.28269	2.07306	2.37769	1.67042	1.42267	1.91132	1.30475e-08	0.000761985
Glyma.08G293200	Domain of unknown function (DUF23)	1.5937	1.27235	0.637325	0.662561	0.470023	2.0642	1.52656	1.80423	1.42221	1.49508	1.3593	1.58505e-08	3.46603e-05
Glyma.08G235400	kunitz trypsin inhibitor 1	1.62292	1.2997	0.315114	0.503361	1.13169	2.66425	1.8497	1.56517	1.65002	1.62457	1.53544	0.00316203	0.0288182
Glyma.10G109500	Transmembrane amino acid transporter family protein	1.62825	1.75394	0.474693	0.454641	0.793213	1.70004	1.75412	2.11527	1.87243	1.95635	2.09805	6.03165e-08	2.80523e-10
Glyma.07G045700	#REF!	1.67637	1.35224	0.262304	0.586328	0.64812	2.01393	1.14922	1.66568	1.04071	1.47871	1.29224	0.00176014	0.0244403
Glyma.04G250600	nodulin MtN21 /EamA-like transporter family protein	1.67764	1.87807	0.362244	0.535421	0.467412	1.24403	1.47686	1.69814	1.9047	1.6741	1.46474	3.39025e-06	3.01927e-08
Glyma.01G216000	Integrase-type DNA-binding superfamily protein	1.69883	1.93554	0.77146	0.983804	0.185761	1.88623	2.31141	2.15947	2.26945	2.33408	2.83799	0.00256358	0.000159916
Glyma.10G130400	Ran BP2/NZF zinc finger-like superfamily protein	1.70221	1.57155	0.692111	0.905936	0.932907	4.48336	2.61238	1.52495	2.38131	2.44538	3.02708	0.0178928	0.0191786
Glyma.06G300100	myb domain protein 14	1.70777	1.64072	0.638247	0.910614	0.857555	2.39972	2.69228	2.80858	2.48621	2.61689	2.39234	5.84506e-10	5.60633e-09
Glyma.05G069200	#REF!	1.72047	1.50361	0.389214	0.66023	0.404274	2.26849	1.43454	1.18365	1.41579	1.08994	1.66258	0.00420353	0.0194289
Glyma.15G211300	NAD(P)-binding Rossmann-fold superfamily protein	1.72076	1.76979	0.492762	0.556127	1.01792	2.00821	2.50512	2.38857	1.80239	2.40154	2.89965	3.2549e-06	3.16838e-06
Glyma.20G044500	#REF!	1.74968	1.78483	0.664429	0.892774	0.713708	3.9596	1.63377	2.25867	1.87844	3.57085	2.50907	0.00898243	0.0047323
Glyma.06G145300	Peroxidase superfamily protein	1.75192	1.74628	0.579349	0.226873	0.394098	1.75468	1.1253	1.22958	1.08625	1.81847	1.14024	0.000212538	0.000347432
Glyma.08G042100	myb domain protein 62	1.75736	1.72047	0.302133	0.268514	0.555096	1.75324	1.15015	0.979406	1.23109	1.38714	1.11957	0.000362904	0.000249502
Glyma.15G226650	#REF!	1.76907	1.46155	0.559369	0.757532	0.71914	2.21293	2.74732	2.04076	1.41276	1.75866	2.454	4.85685e-09	6.37004e-05
Glyma.07G074300	Homeodomain-like transcriptional regulator	1.77388	1.8806	0.388502	0.523798	1.27261	2.51613	2.23714	2.7822	2.82321	2.27142	2.97379	3.52898e-05	5.18194e-06
Glyma.11G159021	Protein of unknown function (DUF793)	1.77736	1.53896	0.635672	0.611928	0.89274	2.27029	2.6244	2.47695	1.89375	2.22287	2.09163	9.08131e-10	1.23961e-06
Glyma.07G197100	Protein of unknown function (DUF506)	1.78211	1.37245	0.735677	0.685858	0.920032	2.69457	3.01176	2.41522	1.45225	1.99554	2.62967	2.66353e-11	9.21724e-05
Glyma.09G092700	#REF!	1.84483	2.09093	0.278338	0.352353	0.322582	1.1657	1.31076	0.978778	1.25255	1.31061	1.5067	1.97391e-05	1.61579e-07
Glyma.02G136200	2-oxoglutarate (2OG) and Fe(II)-dependent oxygenase superfamily protein	1.86035	1.98511	0.904055	0.899643	0.767335	3.03874	3.17399	3.18689	2.96802	3.14258	4.0829	1.12765e-16	6.42201e-17
Glyma.12G032900	Protein kinase protein with adenine nucleotide alpha hydrolases-like domain	1.86912	1.70993	0.384531	0.413447	0.52022	1.50104	1.88138	1.45681	1.58247	1.30089	1.48553	4.77172e-12	8.39024e-10
Glyma.07G011800	Pyridoxal phosphate phosphatase-related protein	1.88604	2.29506	0.302266	0.242618	0.429618	1.18256	1.26775	1.18653	1.77996	1.58343	1.42959	2.77961e-05	1.38005e-08
Glyma.13G234700	NAC domain containing protein 73	1.90565	1.57898	0.602458	0.476762	0.548417	1.91454	2.2869	1.94955	1.84659	1.27441	1.75313	4.37065e-14	1.36008e-07
Glyma.17G244200	phospholipase A 2A	1.92736	1.68668	0.700528	0.597466	0.619118	2.5377	2.18098	2.6273	1.6119	2.02382	2.55366	1.33722e-15	4.06916e-09
Glyma.03G149267	#REF!	1.95541	2.05406	0.208036	0.343981	0.53921	1.21317	1.5748	1.5155	2.05005	1.1933	1.32749	0.000468684	0.000309265
Glyma.19G081500	F-box and associated interaction domains-containing protein	1.95989	1.72749	0.192577	0.456911	0.335995	1.41973	1.03931	1.40833	0.895845	1.52407	0.847294	1.56848e-06	0.000298154
Glyma.12G037902	Subtilase family protein	1.97038	2.26301	0.351301	0.606789	0.501199	1.95513	1.9563	1.9046	1.77476	1.70672	3.62698	9.61484e-05	2.18165e-05
Glyma.14G062300	Laccase/Diphenol oxidase family protein	2.01314	2.02358	0.515813	0.665489	0.671076	2.61933	2.51531	2.4106	1.83	2.61179	3.10939	1.88087e-19	1.84897e-14
Glyma.02G261900	PYR1-like 6	2.01946	2.03687	0.544925	0.536711	0.896151	2.46573	2.02046	3.59402	3.07055	3.01649	2.04502	4.22587e-09	3.76762e-10
Glyma.08G195000	Pyridoxal phosphate phosphatase-related protein	2.03389	2.07862	0.687953	1.08062	0.674234	4.22807	3.25093	2.61368	2.4552	4.05294	3.82927	3.78223e-12	2.2211e-12
Glyma.17G067200	glutamate receptor 2.5	2.08336	2.1112	0.386303	0.576965	0.533367	2.02623	2.13188	2.24421	2.42614	2.1407	1.92363	3.96927e-14	1.0168e-13
Glyma.04G049200	branched-chain amino acid transaminase 2	2.14529	2.26992	0.562321	0.348025	0.838771	1.9482	2.56922	3.64452	2.57728	2.92645	2.84358	1.89927e-11	5.87743e-16
Glyma.13G280000	NAC domain containing protein 2	2.19212	1.76055	0.290142	0.542294	0.283105	1.45348	1.42135	2.26996	1.44874	1.2296	1.11552	2.56458e-09	5.75489e-06
Glyma.07G136800	#REF!	2.20176	1.91782	0.242903	0.344212	0.316834	1.31892	1.58674	1.3057	0.807355	1.41001	1.23233	4.81116e-06	0.000841918
Glyma.09G045600	flowering promoting factor 1	2.21153	2.58874	0.33691	0.054841	0.406222	0.852233	1.85776	1.02581	1.44987	1.91289	1.48078	0.00490783	5.95256e-05
Glyma.15G176802	Rho GTPase activation protein (RhoGAP) with PH domain	2.23519	2.75527	0.362768	0.606131	0.637985	3.03182	1.70072	3.07172	4.34695	3.22575	3.58165	0.000363692	6.56229e-08
Glyma.08G195100	Pyridoxal phosphate phosphatase-related protein	2.25107	2.13427	0.722197	1.09767	1.04977	4.90999	4.61388	4.2417	3.3543	5.4314	3.81379	5.3591e-24	7.64513e-16
Glyma.08G096500	jasmonate-zim-domain protein 8	2.2614	1.95061	0.34203	0.346087	0.164437	1.65818	0.807881	1.63822	0.738974	1.42566	1.10627	0.0002839	0.00451996
Glyma.14G058700	2-oxoglutarate (2OG) and Fe(II)-dependent oxygenase superfamily protein	2.27692	2.43892	0.257627	0.188581	0.417629	1.50953	1.23079	1.49528	1.22525	1.7923	1.68686	8.43854e-09	4.49534e-10
Glyma.06G104600	tetratricopeptide repeat (TPR)-containing protein	2.33483	2.36639	0.336413	0.285222	0.364612	1.62484	1.78731	1.61811	1.46299	1.67163	1.97604	1.70419e-27	1.78943e-25
Glyma.19G002900	NAC (No Apical Meristem) domain transcriptional regulator superfamily protein	2.39968	2.51363	0.485639	0.363884	0.387448	2.77933	2.16591	1.67477	2.1708	2.54813	2.47222	1.42454e-17	1.84437e-24
Glyma.14G067700	#REF!	2.44782	3.01589	0.102409	0.208287	0.390809	1.86967	1.14733	0.972127	1.75363	1.87219	2.28213	0.00550898	1.71882e-05
Glyma.16G133400	XH/XS domain-containing protein	2.80199	2.40375	0.080447	0.167459	0.379497	1.39268	1.41977	1.56778	1.31944	1.17296	0.795235	5.54927e-11	5.96594e-07
Glyma.10G245100	Leucine-rich repeat (LRR) family protein	2.85381	3.02446	0.367071	0.384056	0.539175	2.94665	3.81889	2.64691	2.77103	3.16032	4.61438	2.62838e-26	3.31366e-28
Glyma.19G014600	cytochrome P450, family 82, subfamily C, polypeptide 4	3.05185	2.63716	0.261899	0.099784	0.21009	1.69711	1.54315	1.53377	1.24387	1.2144	1.09914	2.32715e-17	7.31226e-11
Glyma.17G159600	VQ motif-containing protein	3.08272	3.48996	0.429556	0.286067	0.139111	2.63774	1.9195	2.76905	3.18178	2.9822	3.49411	6.71195e-12	9.30945e-19
Glyma.15G067300	NAD(P)H dehydrogenase B2	3.09299	3.12841	0.143249	0.20692	0.137126	1.3815	1.44204	1.36998	1.40134	1.25683	1.61663	1.35147e-23	5.28507e-23
Glyma.03G145600	peroxidase 2	3.33742	3.04372	0.297024	0.093544	0.177684	2.14296	1.94051	1.80235	1.57461	1.6112	1.5776	1.04774e-16	1.96867e-12
Glyma.03G173700	Plant protein 1589 of unknown function	3.51033	3.54148	0.136249	0.025612	0.161781	1.28266	1.34449	1.15371	0.849629	1.10903	1.90432	1.65164e-07	7.56107e-07
Glyma.17G181200	ribosomal RNA processing 4	3.77323	3.50658	0.171522	0.089692	0	2.01229	1.09532	1.25427	1.19412	0.758483	1.65217	0.00137656	0.00798022
Glyma.03G052151	#REF!	4.32534	4.27706	0.173164	0.214257	0.206546	4.55147	4.26147	3.41091	3.66269	3.7104	4.37074	1.2798e-49	7.4924e-49
Glyma.14G167800	#REF!	4.53184	4.48676	0.146181	0	0.070555	2.36746	2.11367	0.579913	0.776364	1.91457	2.18973	2.61884e-07	8.72294e-08
Glyma.05G161900	FASCICLIN-like arabinogalactan-protein 12	4.78143	4.74301	0.036056	0.109147	0	0.880677	1.92792	1.16024	1.48533	1.3771	0.972506	8.99074e-12	1.48777e-12
Glyma.09G131700	#REF!	6.21713	5.80592	0.097592	0	0	3.19793	2.02766	2.46724	0.949933	2.75688	2.03021	0.00745759	0.0193329
Glyma.13G278000	low-molecular-weight cysteine-rich 68	10.4538	10.1813	0	0	0	4.48872	6.83587	4.31608	4.03169	3.87884	4.93348	1.61343e-15	1.06139e-14

## Sheet: Sheet1
Glyma.14G201100
Glyma.01G171300
Glyma.10G184600
Glyma.05G019200
Glyma.05G002700
Glyma.18G265800
Glyma.09G094000
Glyma.08G270500
Glyma.17G164200
Glyma.17G120767
Glyma.10G167100
Glyma.08G070967
