# Supplementary material
Source: MDPI journal article supplement (https://www.mdpi.com/2073-4395/13/5/1383)
Supplement: s1 [file s1 › Supplementary Table S4. KEGG category of downregulated DEGs in gmfbac1gmfbac2 vs wild type.xlsx]

## Sheet: Sheet1
Supplementary Table S4. KEGG category of downregulated DEGs in gmfbac1gmfbac2 vs wild type
Annotation ID	Annotation ID (Glycine max)	Annotation	Database	Input number	Background number	P-Value	Input	Hyperlink
map04075	gmx04075	Plant hormone signal transduction	KEGG PATHWAY	10	675	0.00103419	Glyma.06G039100|Glyma.06G088100|Glyma.13G095200|Glyma.17G065400|Glyma.14G162100|Glyma.13G094900|Glyma.16G020800|Glyma.13G095000|Glyma.17G065100|Glyma.07G015600	http://www.genome.jp/kegg-bin/show_pathway?gmx04075/gmx:100526849%09red/gmx:100800547%09red/gmx:100807235%09red/gmx:100780856%09red/gmx:100784967%09red/gmx:100782104%09red/gmx:100787440%09red/gmx:100782365%09red/gmx:100808516%09red/gmx:100785313%09red
map01110	gmx01110	Biosynthesis of secondary metabolites	KEGG PATHWAY	19	2121	0.00327833	Glyma.08G312000|Glyma.06G137200|Glyma.07G114200|Glyma.10G011000|Glyma.08G144433|Glyma.20G241800|Glyma.12G067000|Glyma.16G200800|Glyma.11G129200|Glyma.09G181000|Glyma.14G195000|Glyma.03G101700|Glyma.13G152780|Glyma.01G134600|Glyma.11G095600|Glyma.20G192700|Glyma.17G049900|Glyma.11G161600|Glyma.13G343000	http://www.genome.jp/kegg-bin/show_pathway?gmx01110/gmx:100779814%09red/gmx:100818557%09red/gmx:100790852%09red/gmx:100820123%09red/gmx:100787771%09red/gmx:100802244%09red/gmx:100801998%09red/gmx:100777636%09red/gmx:100805263%09red/gmx:100783503%09red/gmx:547894%09red/gmx:100777517%09red/gmx:100819470%09red/gmx:100305378%09red/gmx:100781133%09red/gmx:100805835%09red/gmx:100810400%09red/gmx:100813…
map00940	gmx00940	Phenylpropanoid biosynthesis	KEGG PATHWAY	6	349	0.00518725	Glyma.08G312000|Glyma.20G241800|Glyma.13G343000|Glyma.06G137200|Glyma.11G129200|Glyma.11G161600	http://www.genome.jp/kegg-bin/show_pathway?gmx00940/gmx:100802244%09red/gmx:100777636%09red/gmx:100805263%09red/gmx:100779814%09red/gmx:100819470%09red/gmx:100813250%09red
map00460	gmx00460	Cyanoamino acid metabolism	KEGG PATHWAY	3	87	0.00753403	Glyma.13G343000|Glyma.11G129200|Glyma.11G236100	http://www.genome.jp/kegg-bin/show_pathway?gmx00460/gmx:100819470%09red/gmx:100805263%09red/gmx:100813586%09red
map01040	gmx01040	Biosynthesis of unsaturated fatty acids	KEGG PATHWAY	2	39	0.0142205	Glyma.10G278000|Glyma.14G121400	http://www.genome.jp/kegg-bin/show_pathway?gmx01040/gmx:100037478%09red/gmx:547814%09red
map00943	gmx00943	Isoflavonoid biosynthesis	KEGG PATHWAY	2	42	0.0162644	Glyma.12G067000|Glyma.18G267900	http://www.genome.jp/kegg-bin/show_pathway?gmx00943/gmx:100783503%09red/gmx:100813225%09red
map04626	gmx04626	Plant-pathogen interaction	KEGG PATHWAY	5	336	0.0182278	Glyma.12G076800|Glyma.10G178400|Glyma.19G233900|Glyma.20G211700|Glyma.04G245000	http://www.genome.jp/kegg-bin/show_pathway?gmx04626/gmx:547787%09red/gmx:100820185%09red/gmx:100791992%09red/gmx:100500308%09red/gmx:100527117%09red
map00073	gmx00073	Cutin, suberine and wax biosynthesis	KEGG PATHWAY	2	54	0.0255793	Glyma.03G101700|Glyma.07G114200	http://www.genome.jp/kegg-bin/show_pathway?gmx00073/gmx:100805835%09red/gmx:100818557%09red
map00500	gmx00500	Starch and sucrose metabolism	KEGG PATHWAY	4	299	0.0461242	Glyma.11G095600|Glyma.13G343000|Glyma.11G129200|Glyma.01G211000	http://www.genome.jp/kegg-bin/show_pathway?gmx00500/gmx:100798772%09red/gmx:100813589%09red/gmx:100819470%09red/gmx:100805263%09red
map04016	gmx04016	MAPK signaling pathway - plant	KEGG PATHWAY	4	307	0.0498741	Glyma.14G162100|Glyma.04G056067|Glyma.19G233900|Glyma.04G056133	http://www.genome.jp/kegg-bin/show_pathway?gmx04016/gmx:100127402%09red/gmx:100820185%09red/gmx:100807235%09red
map04122	gmx04122	Sulfur relay system	KEGG PATHWAY	1	14	0.064241	Glyma.07G235000	http://www.genome.jp/kegg-bin/show_pathway?gmx04122/gmx:100781775%09red
map00130	gmx00130	Ubiquinone and other terpenoid-quinone biosynthesis	KEGG PATHWAY	2	93	0.0663694	Glyma.13G152780|Glyma.01G134600	http://www.genome.jp/kegg-bin/show_pathway?gmx00130/gmx:100787771%09red/gmx:100777517%09red
map00941	gmx00941	Flavonoid biosynthesis	KEGG PATHWAY	2	94	0.0675903	Glyma.08G312000|Glyma.12G067000	http://www.genome.jp/kegg-bin/show_pathway?gmx00941/gmx:100783503%09red/gmx:100779814%09red
map00052	gmx00052	Galactose metabolism	KEGG PATHWAY	2	103	0.0789024	Glyma.11G095600|Glyma.01G211000	http://www.genome.jp/kegg-bin/show_pathway?gmx00052/gmx:100798772%09red/gmx:100813589%09red
map00909	gmx00909	Sesquiterpenoid and triterpenoid biosynthesis	KEGG PATHWAY	1	25	0.108723	Glyma.20G192700	http://www.genome.jp/kegg-bin/show_pathway?gmx00909/gmx:100810400%09red
map01100	gmx01100	Metabolic pathways	KEGG PATHWAY	24	4144	0.110553	Glyma.08G312000|Glyma.15G234800|Glyma.12G067000|Glyma.07G235000|Glyma.13G152780|Glyma.01G134600|Glyma.10G011000|Glyma.20G241800|Glyma.06G137200|Glyma.13G343000|Glyma.08G144433|Glyma.11G129200|Glyma.09G181000|Glyma.14G195000|Glyma.11G095600|Glyma.01G211000|Glyma.14G121400|Glyma.11G198300|Glyma.16G200800|Glyma.10G278000|Glyma.09G021100|Glyma.17G049900|Glyma.11G236100|Glyma.11G161600	http://www.genome.jp/kegg-bin/show_pathway?gmx01100/gmx:100777636%09red/gmx:100805263%09red/gmx:100779814%09red/gmx:100777517%09red/gmx:100819470%09red/gmx:100789775%09red/gmx:100798772%09red/gmx:100813586%09red/gmx:100786608%09red/gmx:100787771%09red/gmx:100813589%09red/gmx:547894%09red/gmx:100781133%09red/gmx:100813250%09red/gmx:100790852%09red/gmx:100801998%09red/gmx:100820123%09red/gmx:547814…
map01212	gmx01212	Fatty acid metabolism	KEGG PATHWAY	2	127	0.111549	Glyma.10G278000|Glyma.14G121400	http://www.genome.jp/kegg-bin/show_pathway?gmx01212/gmx:100037478%09red/gmx:547814%09red
map00590	gmx00590	Arachidonic acid metabolism	KEGG PATHWAY	1	31	0.132092	Glyma.11G236100	http://www.genome.jp/kegg-bin/show_pathway?gmx00590/gmx:100813586%09red
map00430	gmx00430	Taurine and hypotaurine metabolism	KEGG PATHWAY	1	33	0.139745	Glyma.11G236100	http://www.genome.jp/kegg-bin/show_pathway?gmx00430/gmx:100813586%09red
map04146	gmx04146	Peroxisome	KEGG PATHWAY	2	151	0.146987	Glyma.10G193500|Glyma.20G196900	http://www.genome.jp/kegg-bin/show_pathway?gmx04146/gmx:547531%09red/gmx:547823%09red
map00945	gmx00945	Stilbenoid, diarylheptanoid and gingerol biosynthesis	KEGG PATHWAY	1	44	0.180652	Glyma.08G312000	http://www.genome.jp/kegg-bin/show_pathway?gmx00945/gmx:100779814%09red
map00591	gmx00591	Linoleic acid metabolism	KEGG PATHWAY	1	48	0.195042	Glyma.08G189300	http://www.genome.jp/kegg-bin/show_pathway?gmx00591/gmx:100802685%09red
map00790	gmx00790	Folate biosynthesis	KEGG PATHWAY	1	50	0.202142	Glyma.07G235000	http://www.genome.jp/kegg-bin/show_pathway?gmx00790/gmx:100781775%09red
map00904	gmx00904	Diterpenoid biosynthesis	KEGG PATHWAY	1	55	0.219621	Glyma.16G200800	http://www.genome.jp/kegg-bin/show_pathway?gmx00904/gmx:100305378%09red
map02010	gmx02010	ABC transporters	KEGG PATHWAY	1	66	0.256745	Glyma.13G127500	http://www.genome.jp/kegg-bin/show_pathway?gmx02010/gmx:100781010%09red
map00906	gmx00906	Carotenoid biosynthesis	KEGG PATHWAY	1	66	0.256745	Glyma.14G082900	http://www.genome.jp/kegg-bin/show_pathway?gmx00906/gmx:100779978%09red
map00061	gmx00061	Fatty acid biosynthesis	KEGG PATHWAY	1	82	0.307625	Glyma.14G121400	http://www.genome.jp/kegg-bin/show_pathway?gmx00061/gmx:100037478%09red
map00010	gmx00010	Glycolysis / Gluconeogenesis	KEGG PATHWAY	2	260	0.322048	Glyma.11G095600|Glyma.08G144433	http://www.genome.jp/kegg-bin/show_pathway?gmx00010/gmx:100813589%09red/gmx:100790852%09red
map00860	gmx00860	Porphyrin and chlorophyll metabolism	KEGG PATHWAY	1	90	0.331748	Glyma.09G181000	http://www.genome.jp/kegg-bin/show_pathway?gmx00860/gmx:100820123%09red
map03060	gmx03060	Protein export	KEGG PATHWAY	1	92	0.337647	Glyma.18G071100	http://www.genome.jp/kegg-bin/show_pathway?gmx03060/gmx:100809457%09red
map00592	gmx00592	alpha-Linolenic acid metabolism	KEGG PATHWAY	1	97	0.352169	Glyma.17G049900	http://www.genome.jp/kegg-bin/show_pathway?gmx00592/gmx:100801998%09red
map00250	gmx00250	Alanine, aspartate and glutamate metabolism	KEGG PATHWAY	1	98	0.355035	Glyma.14G195000	http://www.genome.jp/kegg-bin/show_pathway?gmx00250/gmx:547894%09red
map00260	gmx00260	Glycine, serine and threonine metabolism	KEGG PATHWAY	1	112	0.393858	Glyma.08G144433	http://www.genome.jp/kegg-bin/show_pathway?gmx00260/gmx:100790852%09red
map04070	gmx04070	Phosphatidylinositol signaling system	KEGG PATHWAY	1	126	0.430354	Glyma.15G234800	http://www.genome.jp/kegg-bin/show_pathway?gmx04070/gmx:100789775%09red
map00051	gmx00051	Fructose and mannose metabolism	KEGG PATHWAY	1	128	0.435386	Glyma.11G095600	http://www.genome.jp/kegg-bin/show_pathway?gmx00051/gmx:100813589%09red
map00630	gmx00630	Glyoxylate and dicarboxylate metabolism	KEGG PATHWAY	1	128	0.435386	Glyma.11G198300	http://www.genome.jp/kegg-bin/show_pathway?gmx00630/gmx:100817853%09red
map00562	gmx00562	Inositol phosphate metabolism	KEGG PATHWAY	1	130	0.440374	Glyma.15G234800	http://www.genome.jp/kegg-bin/show_pathway?gmx00562/gmx:100789775%09red
map04141	gmx04141	Protein processing in endoplasmic reticulum	KEGG PATHWAY	2	375	0.496954	Glyma.08G068800|Glyma.18G071100	http://www.genome.jp/kegg-bin/show_pathway?gmx04141/gmx:100527855%09red/gmx:100809457%09red
map00561	gmx00561	Glycerolipid metabolism	KEGG PATHWAY	1	158	0.505763	Glyma.10G011000	http://www.genome.jp/kegg-bin/show_pathway?gmx00561/gmx:100781133%09red
map00480	gmx00480	Glutathione metabolism	KEGG PATHWAY	1	170	0.531403	Glyma.11G236100	http://www.genome.jp/kegg-bin/show_pathway?gmx00480/gmx:100813586%09red
map01230	gmx01230	Biosynthesis of amino acids	KEGG PATHWAY	2	426	0.564989	Glyma.14G195000|Glyma.08G144433	http://www.genome.jp/kegg-bin/show_pathway?gmx01230/gmx:547894%09red/gmx:100790852%09red
map00564	gmx00564	Glycerophospholipid metabolism	KEGG PATHWAY	1	187	0.565474	Glyma.10G011000	http://www.genome.jp/kegg-bin/show_pathway?gmx00564/gmx:100781133%09red
map03018	gmx03018	RNA degradation	KEGG PATHWAY	1	203	0.595283	Glyma.19G188700	http://www.genome.jp/kegg-bin/show_pathway?gmx03018/gmx:100779547%09red
map00040	gmx00040	Pentose and glucuronate interconversions	KEGG PATHWAY	1	207	0.602412	Glyma.09G021100	http://www.genome.jp/kegg-bin/show_pathway?gmx00040/gmx:100786608%09red
map03015	gmx03015	mRNA surveillance pathway	KEGG PATHWAY	1	224	0.631339	Glyma.19G188700	http://www.genome.jp/kegg-bin/show_pathway?gmx03015/gmx:100779547%09red
map01200	gmx01200	Carbon metabolism	KEGG PATHWAY	2	492	0.642874	Glyma.11G095600|Glyma.08G144433	http://www.genome.jp/kegg-bin/show_pathway?gmx01200/gmx:100813589%09red/gmx:100790852%09red
map00520	gmx00520	Amino sugar and nucleotide sugar metabolism	KEGG PATHWAY	1	254	0.677367	Glyma.11G095600	http://www.genome.jp/kegg-bin/show_pathway?gmx00520/gmx:100813589%09red
map03013	gmx03013	RNA transport	KEGG PATHWAY	1	283	0.71641	Glyma.19G188700	http://www.genome.jp/kegg-bin/show_pathway?gmx03013/gmx:100779547%09red
map04144	gmx04144	Endocytosis	KEGG PATHWAY	1	327	0.766847	Glyma.15G234800	http://www.genome.jp/kegg-bin/show_pathway?gmx04144/gmx:100789775%09red
