# Supplementary material
Source: MDPI journal article supplement (https://www.mdpi.com/2073-4395/13/5/1383)
Supplement: s1 [file s1 › Supplementary Table S5. KEGG category of upregulated DEGs in gmfbac1gmfbac2 vs wild type.xlsx]

## Sheet: Sheet1
Supplementary Table S5. KEGG category of upregulated DEGs in gmfbac1gmfbac2 vs wild type
Annotation ID	Annotation ID (Glycine max)	Annotation	Database	Input number	Background number	P-Value	Input	Hyperlink
map00750	gmx00750	Vitamin B6 metabolism	KEGG PATHWAY	4	27	2.12366e-05	Glyma.07G011700|Glyma.08G195100|Glyma.08G195000|Glyma.07G011800	http://www.genome.jp/kegg-bin/show_pathway?gmx00750/gmx:100785897%09red/gmx:100782134%09red/gmx:100306469%09red/gmx:100786409%09red
map01110	gmx01110	Biosynthesis of secondary metabolites	KEGG PATHWAY	26	2121	8.19967e-05	Glyma.11G116600|Glyma.03G145600|Glyma.11G027400|Glyma.18G061100|Glyma.06G302200|Glyma.04G049200|Glyma.15G031400|Glyma.16G131200|Glyma.11G170300|Glyma.06G032451|Glyma.06G032500|Glyma.16G204600|Glyma.13G183200|Glyma.17G128000|Glyma.02G130400|Glyma.11G247600|Glyma.19G239800|Glyma.11G003500|Glyma.11G197500|Glyma.11G171400|Glyma.08G179600|Glyma.09G022300|Glyma.06G145300|Glyma.06G050100|Glyma.08G150800…	http://www.genome.jp/kegg-bin/show_pathway?gmx01110/gmx:100807448%09red/gmx:100782452%09red/gmx:100818776%09red/gmx:100782644%09red/gmx:732647%09red/gmx:100790220%09red/gmx:732628%09red/gmx:547895%09red/gmx:548068%09red/gmx:100170686%09red/gmx:100783115%09red/gmx:100808791%09red/gmx:100814915%09red/gmx:100788604%09red/gmx:100817322%09red/gmx:100812431%09red/gmx:100790279%09red/gmx:100807342%09red…
map01100	gmx01100	Metabolic pathways	KEGG PATHWAY	41	4144	9.43682e-05	Glyma.11G116600|Glyma.05G211502|Glyma.03G145600|Glyma.18G061100|Glyma.06G193500|Glyma.19G218300|Glyma.17G138500|Glyma.07G011800|Glyma.02G132100|Glyma.04G049200|Glyma.15G031400|Glyma.13G084000|Glyma.20G101100|Glyma.16G131200|Glyma.11G170300|Glyma.05G222000|Glyma.19G223000|Glyma.06G032500|Glyma.16G204600|Glyma.13G183200|Glyma.17G128000|Glyma.02G130400|Glyma.13G092500|Glyma.11G247600|Glyma.19G239800…	http://www.genome.jp/kegg-bin/show_pathway?gmx01100/gmx:100807448%09red/gmx:100809287%09red/gmx:100818776%09red/gmx:100782644%09red/gmx:100775519%09red/gmx:100790220%09red/gmx:100306469%09red/gmx:100782134%09red/gmx:100787923%09red/gmx:100785897%09red/gmx:732628%09red/gmx:100818394%09red/gmx:100786409%09red/gmx:100813471%09red/gmx:547586%09red/gmx:547581%09red/gmx:100799487%09red/gmx:100170686%09…
map01230	gmx01230	Biosynthesis of amino acids	KEGG PATHWAY	9	426	0.000557425	Glyma.11G247600|Glyma.19G239800|Glyma.11G003500|Glyma.11G171400|Glyma.11G170300|Glyma.18G061100|Glyma.06G050100|Glyma.16G204600|Glyma.04G049200	http://www.genome.jp/kegg-bin/show_pathway?gmx01230/gmx:100782644%09red/gmx:100170686%09red/gmx:100818776%09red/gmx:100787663%09red/gmx:547895%09red/gmx:100807342%09red/gmx:100788604%09red/gmx:100798318%09red
map00500	gmx00500	Starch and sucrose metabolism	KEGG PATHWAY	7	299	0.00128252	Glyma.15G031400|Glyma.11G116600|Glyma.13G092500|Glyma.17G138500|Glyma.06G032451|Glyma.06G032500|Glyma.12G042400	http://www.genome.jp/kegg-bin/show_pathway?gmx00500/gmx:100812431%09red/gmx:100799487%09red/gmx:100814915%09red/gmx:100808791%09red/gmx:100789206%09red/gmx:100790220%09red
map00940	gmx00940	Phenylpropanoid biosynthesis	KEGG PATHWAY	7	349	0.00299633	Glyma.15G031400|Glyma.09G022300|Glyma.03G145600|Glyma.16G131200|Glyma.05G231800|Glyma.06G145300|Glyma.08G179600	http://www.genome.jp/kegg-bin/show_pathway?gmx00940/gmx:100812431%09red/gmx:100817721%09red/gmx:100807448%09red/gmx:100790279%09red/gmx:100783115%09red/gmx:548068%09red/gmx:100789249%09red
map00910	gmx00910	Nitrogen metabolism	KEGG PATHWAY	3	65	0.00563647	Glyma.13G084000|Glyma.07G212800|Glyma.02G132100	http://www.genome.jp/kegg-bin/show_pathway?gmx00910/gmx:100775519%09red/gmx:100813471%09red/gmx:732631%09red
map04075	gmx04075	Plant hormone signal transduction	KEGG PATHWAY	9	675	0.011013	Glyma.01G204400|Glyma.17G047700|Glyma.02G261900|Glyma.11G038600|Glyma.16G020500|Glyma.12G108900|Glyma.14G056300|Glyma.15G179600|Glyma.15G062700	http://www.genome.jp/kegg-bin/show_pathway?gmx04075/gmx:100804965%09red/gmx:100798803%09red/gmx:100527510%09red/gmx:100800709%09red/gmx:100306332%09red/gmx:100804400%09red/gmx:100807250%09red/gmx:100792358%09red/gmx:100812618%09red
map00520	gmx00520	Amino sugar and nucleotide sugar metabolism	KEGG PATHWAY	5	254	0.0124245	Glyma.06G032500|Glyma.11G116600|Glyma.05G222000|Glyma.06G032451|Glyma.12G042400	http://www.genome.jp/kegg-bin/show_pathway?gmx00520/gmx:100814915%09red/gmx:100790220%09red/gmx:100795881%09red/gmx:100808791%09red
map00250	gmx00250	Alanine, aspartate and glutamate metabolism	KEGG PATHWAY	3	98	0.0165137	Glyma.11G171400|Glyma.18G061100|Glyma.11G170300	http://www.genome.jp/kegg-bin/show_pathway?gmx00250/gmx:100798318%09red/gmx:547895%09red
map00290	gmx00290	Valine, leucine and isoleucine biosynthesis	KEGG PATHWAY	2	37	0.0180344	Glyma.06G050100|Glyma.04G049200	http://www.genome.jp/kegg-bin/show_pathway?gmx00290/gmx:100782644%09red/gmx:100818776%09red
map00770	gmx00770	Pantothenate and CoA biosynthesis	KEGG PATHWAY	2	57	0.0388856	Glyma.06G050100|Glyma.04G049200	http://www.genome.jp/kegg-bin/show_pathway?gmx00770/gmx:100782644%09red/gmx:100818776%09red
map00010	gmx00010	Glycolysis / Gluconeogenesis	KEGG PATHWAY	4	260	0.0518188	Glyma.06G032500|Glyma.16G204600|Glyma.06G032451|Glyma.11G247600	http://www.genome.jp/kegg-bin/show_pathway?gmx00010/gmx:100814915%09red/gmx:100787663%09red/gmx:100807342%09red
map00400	gmx00400	Phenylalanine, tyrosine and tryptophan biosynthesis	KEGG PATHWAY	2	72	0.0583352	Glyma.11G003500|Glyma.19G239800	http://www.genome.jp/kegg-bin/show_pathway?gmx00400/gmx:100788604%09red/gmx:100170686%09red
map00061	gmx00061	Fatty acid biosynthesis	KEGG PATHWAY	2	82	0.0727886	Glyma.19G218300|Glyma.03G221350	http://www.genome.jp/kegg-bin/show_pathway?gmx00061/gmx:100807687%09red/gmx:100818394%09red
map04016	gmx04016	MAPK signaling pathway - plant	KEGG PATHWAY	4	307	0.0831788	Glyma.16G020500|Glyma.14G056300|Glyma.02G261900|Glyma.15G062700	http://www.genome.jp/kegg-bin/show_pathway?gmx04016/gmx:100804965%09red/gmx:100798803%09red/gmx:100804400%09red/gmx:100807250%09red
map00860	gmx00860	Porphyrin and chlorophyll metabolism	KEGG PATHWAY	2	90	0.085084	Glyma.08G150800|Glyma.11G027400	http://www.genome.jp/kegg-bin/show_pathway?gmx00860/gmx:732647%09red/gmx:100810127%09red
map01210	gmx01210	2-Oxocarboxylic acid metabolism	KEGG PATHWAY	2	95	0.0930636	Glyma.06G050100|Glyma.04G049200	http://www.genome.jp/kegg-bin/show_pathway?gmx01210/gmx:100782644%09red/gmx:100818776%09red
map03018	gmx03018	RNA degradation	KEGG PATHWAY	3	203	0.09585	Glyma.17G181200|Glyma.16G204600|Glyma.08G171800	http://www.genome.jp/kegg-bin/show_pathway?gmx03018/gmx:100787663%09red/gmx:100812450%09red/gmx:100776358%09red
map00280	gmx00280	Valine, leucine and isoleucine degradation	KEGG PATHWAY	2	97	0.0963141	Glyma.06G050100|Glyma.04G049200	http://www.genome.jp/kegg-bin/show_pathway?gmx00280/gmx:100782644%09red/gmx:100818776%09red
map00592	gmx00592	alpha-Linolenic acid metabolism	KEGG PATHWAY	2	97	0.0963141	Glyma.19G011700|Glyma.11G197500	http://www.genome.jp/kegg-bin/show_pathway?gmx00592/gmx:100794600%09red/gmx:100817322%09red
map03030	gmx03030	DNA replication	KEGG PATHWAY	2	99	0.0995967	Glyma.08G313300|Glyma.13G029600	http://www.genome.jp/kegg-bin/show_pathway?gmx03030/gmx:100790704%09red/gmx:100798779%09red
map00944	gmx00944	Flavone and flavonol biosynthesis	KEGG PATHWAY	1	19	0.10029	Glyma.13G056100	http://www.genome.jp/kegg-bin/show_pathway?gmx00944/gmx:100127426%09red
map00071	gmx00071	Fatty acid degradation	KEGG PATHWAY	2	100	0.10125	Glyma.19G218300|Glyma.03G221350	http://www.genome.jp/kegg-bin/show_pathway?gmx00071/gmx:100807687%09red/gmx:100818394%09red
map00052	gmx00052	Galactose metabolism	KEGG PATHWAY	2	103	0.106254	Glyma.17G138500|Glyma.03G222000	http://www.genome.jp/kegg-bin/show_pathway?gmx00052/gmx:100799487%09red/gmx:100809287%09red
map00030	gmx00030	Pentose phosphate pathway	KEGG PATHWAY	2	112	0.121644	Glyma.06G032500|Glyma.06G032451	http://www.genome.jp/kegg-bin/show_pathway?gmx00030/gmx:100814915%09red
map01200	gmx01200	Carbon metabolism	KEGG PATHWAY	5	492	0.123829	Glyma.06G032500|Glyma.16G204600|Glyma.06G032451|Glyma.11G247600|Glyma.17G128000	http://www.genome.jp/kegg-bin/show_pathway?gmx01200/gmx:100814915%09red/gmx:100787663%09red/gmx:732628%09red/gmx:100807342%09red
map01212	gmx01212	Fatty acid metabolism	KEGG PATHWAY	2	127	0.148368	Glyma.19G218300|Glyma.03G221350	http://www.genome.jp/kegg-bin/show_pathway?gmx01212/gmx:100807687%09red/gmx:100818394%09red
map04146	gmx04146	Peroxisome	KEGG PATHWAY	2	151	0.193153	Glyma.19G218300|Glyma.03G221350	http://www.genome.jp/kegg-bin/show_pathway?gmx04146/gmx:100807687%09red/gmx:100818394%09red
map00943	gmx00943	Isoflavonoid biosynthesis	KEGG PATHWAY	1	42	0.203291	Glyma.13G056100	http://www.genome.jp/kegg-bin/show_pathway?gmx00943/gmx:100127426%09red
map00945	gmx00945	Stilbenoid, diarylheptanoid and gingerol biosynthesis	KEGG PATHWAY	1	44	0.211672	Glyma.14G200800	http://www.genome.jp/kegg-bin/show_pathway?gmx00945/gmx:100781008%09red
map00950	gmx00950	Isoquinoline alkaloid biosynthesis	KEGG PATHWAY	1	46	0.219965	Glyma.13G183200	http://www.genome.jp/kegg-bin/show_pathway?gmx00950/gmx:100798709%09red
map00591	gmx00591	Linoleic acid metabolism	KEGG PATHWAY	1	48	0.228171	Glyma.11G197500	http://www.genome.jp/kegg-bin/show_pathway?gmx00591/gmx:100817322%09red
map00480	gmx00480	Glutathione metabolism	KEGG PATHWAY	2	170	0.229682	Glyma.20G101100|Glyma.06G193500	http://www.genome.jp/kegg-bin/show_pathway?gmx00480/gmx:547586%09red/gmx:547581%09red
map03040	gmx03040	Spliceosome	KEGG PATHWAY	3	315	0.23588	Glyma.11G103100|Glyma.19G172200|Glyma.18G004000	http://www.genome.jp/kegg-bin/show_pathway?gmx03040/gmx:100815173%09red/gmx:100815386%09red/gmx:100777767%09red
map00073	gmx00073	Cutin, suberine and wax biosynthesis	KEGG PATHWAY	1	54	0.252276	Glyma.08G010500	http://www.genome.jp/kegg-bin/show_pathway?gmx00073/gmx:100775546%09red
map02010	gmx02010	ABC transporters	KEGG PATHWAY	1	66	0.298259	Glyma.13G119000	http://www.genome.jp/kegg-bin/show_pathway?gmx02010/gmx:100800293%09red
map03410	gmx03410	Base excision repair	KEGG PATHWAY	1	68	0.305643	Glyma.08G313300	http://www.genome.jp/kegg-bin/show_pathway?gmx03410/gmx:100790704%09red
map00270	gmx00270	Cysteine and methionine metabolism	KEGG PATHWAY	2	211	0.30935	Glyma.06G050100|Glyma.04G049200	http://www.genome.jp/kegg-bin/show_pathway?gmx00270/gmx:100782644%09red/gmx:100818776%09red
map00350	gmx00350	Tyrosine metabolism	KEGG PATHWAY	1	86	0.368718	Glyma.13G183200	http://www.genome.jp/kegg-bin/show_pathway?gmx00350/gmx:100798709%09red
map00460	gmx00460	Cyanoamino acid metabolism	KEGG PATHWAY	1	87	0.37205	Glyma.15G031400	http://www.genome.jp/kegg-bin/show_pathway?gmx00460/gmx:100812431%09red
map00053	gmx00053	Ascorbate and aldarate metabolism	KEGG PATHWAY	1	90	0.38194	Glyma.05G211502	http://www.genome.jp/kegg-bin/show_pathway?gmx00053/gmx:100819919%09red
map00900	gmx00900	Terpenoid backbone biosynthesis	KEGG PATHWAY	1	93	0.391675	Glyma.06G302200	http://www.genome.jp/kegg-bin/show_pathway?gmx00900/gmx:100782452%09red
map00941	gmx00941	Flavonoid biosynthesis	KEGG PATHWAY	1	94	0.394886	Glyma.02G130400	http://www.genome.jp/kegg-bin/show_pathway?gmx00941/gmx:100788048%09red
map03440	gmx03440	Homologous recombination	KEGG PATHWAY	1	98	0.407562	Glyma.08G313300	http://www.genome.jp/kegg-bin/show_pathway?gmx03440/gmx:100790704%09red
map04712	gmx04712	Circadian rhythm - plant	KEGG PATHWAY	1	106	0.432125	Glyma.02G130400	http://www.genome.jp/kegg-bin/show_pathway?gmx04712/gmx:100788048%09red
map00260	gmx00260	Glycine, serine and threonine metabolism	KEGG PATHWAY	1	112	0.449879	Glyma.11G003500	http://www.genome.jp/kegg-bin/show_pathway?gmx00260/gmx:100170686%09red
map03420	gmx03420	Nucleotide excision repair	KEGG PATHWAY	1	123	0.481004	Glyma.08G313300	http://www.genome.jp/kegg-bin/show_pathway?gmx03420/gmx:100790704%09red
map00710	gmx00710	Carbon fixation in photosynthetic organisms	KEGG PATHWAY	1	127	0.491881	Glyma.11G247600	http://www.genome.jp/kegg-bin/show_pathway?gmx00710/gmx:100807342%09red
map00051	gmx00051	Fructose and mannose metabolism	KEGG PATHWAY	1	128	0.494565	Glyma.19G223000	http://www.genome.jp/kegg-bin/show_pathway?gmx00051/gmx:100787923%09red
map00630	gmx00630	Glyoxylate and dicarboxylate metabolism	KEGG PATHWAY	1	128	0.494565	Glyma.17G128000	http://www.genome.jp/kegg-bin/show_pathway?gmx00630/gmx:732628%09red
map04144	gmx04144	Endocytosis	KEGG PATHWAY	2	327	0.518383	Glyma.19G172200|Glyma.05G069150	http://www.genome.jp/kegg-bin/show_pathway?gmx04144/gmx:100818169%09red/gmx:100777767%09red
map04626	gmx04626	Plant-pathogen interaction	KEGG PATHWAY	2	336	0.532834	Glyma.02G236800|Glyma.15G062700	http://www.genome.jp/kegg-bin/show_pathway?gmx04626/gmx:100817278%09red/gmx:100807250%09red
map04141	gmx04141	Protein processing in endoplasmic reticulum	KEGG PATHWAY	2	375	0.59197	Glyma.12G112000|Glyma.19G172200	http://www.genome.jp/kegg-bin/show_pathway?gmx04141/gmx:100807729%09red/gmx:100777767%09red
map00620	gmx00620	Pyruvate metabolism	KEGG PATHWAY	1	181	0.618308	Glyma.17G128000	http://www.genome.jp/kegg-bin/show_pathway?gmx00620/gmx:732628%09red
